# Supplementary material
Source: PubMed Central journal article supplement (PMC6739137)
Supplement: NIHMS1048113-supplement-Supporting_Info.pdf [file NIHMS1048113-supplement-Supporting_Info.pdf]

## Supporting Information

# Direct Conversion of Primary Alcohols to 1,2-Amino Alcohols: Enantioselective Iridium-Catalyzed Carbonyl Reductive Coupling of Phthalimido-Allene *via* Hydrogen Auto-Transfer

Kim Spielmann<sup>†</sup>, Ming Xiang<sup>†</sup>, Leyah A. Schwartz<sup>†</sup>, and Michael J. Krische<sup>\*</sup>

University of Texas at Austin, Department of Chemistry, Austin, TX 78712, USA

## Table of Contents

|                                                                                                                          |           |
|--------------------------------------------------------------------------------------------------------------------------|-----------|
| General Information.....                                                                                                 | S3        |
| Spectroscopy, Spectrometry, and Data Collection.....                                                                     | S3        |
| Selected Optimization Experiments.....                                                                                   | S4        |
| Synthesis of Ir-V and Ir-VI.....                                                                                         | S5-S7     |
| Synthesis of Phthalimido-Allene.....                                                                                     | S8-S11    |
| Procedures and Spectral Data for the Coupling Products of<br>Phthalimido-Allene and Alcohols <b>3a-3z, 3a'-3c'</b> ..... | S12-S99   |
| Procedures and Spectral Data for the Elaboration of Morpholine <b>5a</b> .....                                           | S100-S105 |
| Procedures and Spectral Data for the Elaboration of Amino-Acid <b>6m</b> .....                                           | S106-S111 |
| Isotopic Labeling Studies.....                                                                                           | S112-S120 |
| Single Crystal Diffraction Data for Coupling Products <b>3a, 3v and Ir-VI</b> .....                                      | S121-S126 |
| Kinetic Studies.....                                                                                                     | S127-S133 |
| References.....                                                                                                          | S134      |

## **General Information**

All reactions were run under an atmosphere of argon, unless otherwise indicated. Resealable pressure tubes (13x100 mm) were purchased from Fischer Scientific (catalog number 14-959-35C) and were flame dried followed by cooling in a desiccator or under a stream of argon prior to use. All commercial reagents and anhydrous solvents were used as received from vendors (Strem Chemicals, Fischer Scientific, Sigma Aldrich and Combi Blocks) without further purification. Preparative column chromatography employing Silicycle silica gel (40-63  $\mu\text{m}$ ) was performed according to the method of Still.<sup>1</sup> Analytical thin-layer chromatography (TLC) was carried out using 0.25 mm commercial silica gel plates (Dynamic Absorbents F254). Visualization was accomplished with UV light followed by dipping in CAM, *p*-Anisaldehyde (PAA), or KMnO<sub>4</sub> stain solution followed by heating. Specific optical rotations were recorded on an Atago AP-300 automatic polarimeter at the sodium line (589.3 nm) in CHCl<sub>3</sub>. Solution concentrations are given in the units of 10<sup>-2</sup> g mL<sup>-1</sup>. Racemic reactions were conducted using racemic catalyst prepared in utilizing racemic BINAP ligand.

## **Spectroscopy, Spectrometry, and Data Collection**

Infrared spectra were recorded on a Perkin-Elmer 1600 spectrometer. High-resolution mass spectra (HRMS) were obtained on a Karatos MS9 and are reported as *m/z* (relative intensity). Accurate masses are reported for the molecular ion (M+H, M+Na), or a suitable fragment ion. Proton nuclear magnetic resonance (<sup>1</sup>H NMR) spectra were recorded with a Varian INOVA (500 MHz) spectrometer equipped with a Bruker AVANCE III cryoprobe. Chemical shifts are reported in delta ( $\delta$ ) units, parts per million (ppm) downfield from tetramethylsilane or ppm relative to the center of the singlet at 7.26 ppm for deuteriochloroform. Data reported as multiplicity (*s* = singlet, *d* = doublet, *t* = triplet, *q* = quartet, *m* = multiplet). Integration and coupling constants were reported in Hertz (Hz). Carbon-13 nuclear magnetic resonance (<sup>13</sup>C NMR) spectra were recorded with a Varian INOVA (125 MHz) spectrometer and were routinely run with broadband decoupling. Chemical shifts are reported in delta ( $\delta$ ) units, ppm relative to the center of the triplet at 77.16 ppm for deuteriochloroform. Fluorine-19 nuclear magnetic resonance (<sup>19</sup>F NMR) spectra were recorded with a Varian INOVA (470 MHz) spectrometer. Deuterium nuclear magnetic resonance (<sup>2</sup>H NMR) spectra were recorded in CHCl<sub>3</sub> solution with a Varian Gemini 500 (77 MHz) spectrometer (relaxation delay 2.00s).

## Experimental Details and Spectral Data

### Selected Optimization Experiments

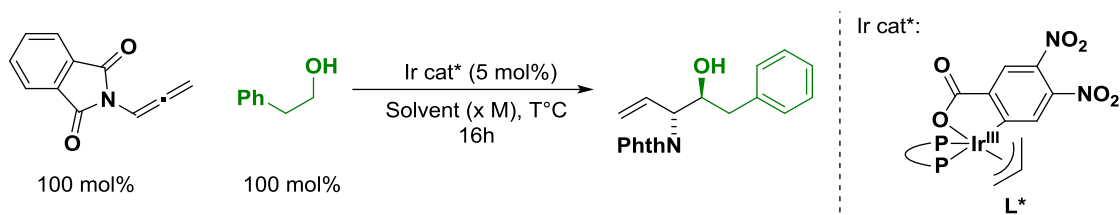

| Entry           | L*                         | Solvent (M)     | Temp (°C) | Yield (%) | ee (%) | dr    |
|-----------------|----------------------------|-----------------|-----------|-----------|--------|-------|
| 1               | ( <i>R</i> )-DTBM-SEGPPOS  | THF (0.2 M)     | 100       | <10       | N/D    | N/D   |
| 2               | ( <i>R</i> )-Cl,MeO-BIPHEP | THF (0.2 M)     | 100       | 42        | 87     | >20:1 |
| 3               | ( <i>R</i> )-Tol-BINAP     | THF (0.2 M)     | 100       | 31        | 85     | >20:1 |
| 4               | ( <i>R</i> )-H8-BINAP      | THF (0.2 M)     | 100       | 69        | 96     | >20:1 |
| 5               | ( <i>R</i> )-H8-BINAP      | Dioxane (0.2 M) | 100       | 68        | 94     | >20:1 |
| 6               | ( <i>R</i> )-H8-BINAP      | PhMe (0.2 M)    | 100       | 59        | 92     | >20:1 |
| 7               | ( <i>R</i> )-H8-BINAP      | THF (0.5 M)     | 100       | 60        | 94     | >20:1 |
| 8               | ( <i>R</i> )-H8-BINAP      | THF (0.1 M)     | 100       | 37        | 97     | >20:1 |
| 9               | ( <i>R</i> )-H8-BINAP      | THF (0.2 M)     | 90        | 65        | 96     | >20:1 |
| 10              | ( <i>R</i> )-H8-BINAP      | THF (0.2 M)     | 80        | 40        | 96     | >20:1 |
| 11 <sup>a</sup> | ( <i>R</i> )-H8-BINAP      | THF (0.2 M)     | 100       | 71        | 96     | >20:1 |

<sup>a</sup>150 mol% of phthalimido-allene 1 and 48 h reaction time

## Synthesis of Ir-V and Ir-VI

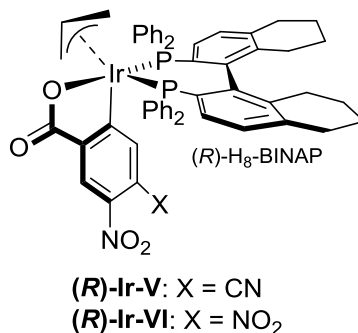

To a dried pressure tube with a magnetic stir bar under an argon atmosphere charged with Cs<sub>2</sub>CO<sub>3</sub> (586 mg, 1.80 mmol, 225 mol%), the corresponding benzoic acid (1.60 mmol, 200 mol%), (R)-H<sub>8</sub>-BINAP (505mg, 0.80 mmol, 100 mol%), and [Ir(cod)Cl]<sub>2</sub> (268 mg, 0.40 mmol, 50 mol%) was added THF (8 mL, 0.1 M) followed by allyl acetate (0.22 mL, 2.0 mmol, 250 mol%). The resulting mixture was stirred at ambient temperature for 30 min, at which point the reaction vessel was transferred to an oil bath at 80 °C. After stirring for 120 min, the reaction mixture was allowed to cool to ambient temperature. The mixture was filtered through a celite plug with the aid of THF. The filtrate was concentrated *in vacuo* and the residue subjected to column chromatography (SiO<sub>2</sub>, 20:1 DCM:THF). The gum-like product was dissolved in a minimum volume of THF and precipitated upon rapid addition of hexanes. The product was filtered and washed with hexanes, followed by removal of trace amount of solvent *in vacuo*.

**(R)-Ir-V:** 4-cyano-3-nitrobenzoic acid (307 mg) was used. The title complex was obtained as light yellow powder in 85% yield (716 mg).

**(R)-Ir-VI:** 3,4-dinitrobenzoic acid (340 mg) was used. The title complex was obtained as light yellow powder in 86% yield (736 mg).

**(R)-Ir-V:**

**$^{31}\text{P}$  NMR (202 MHz,  $\text{CDCl}_3$ ):**  $\delta$  -8.18 (d,  $J = 20.0$  Hz), -11.41 (d,  $J = 19.9$  Hz), -12.40 (d,  $J = 21.0$  Hz), -12.76 (d,  $J = 19.7$  Hz), -14.37 (d,  $J = 23.7$  Hz), -15.64 (d,  $J = 23.7$  Hz).

**HRMS** ( $\text{H}^+$ ,  $m/z$ ) for  $\text{C}_{55}\text{H}_{47}\text{IrN}_2\text{O}_4\text{P}_2$ : calcd. = 1053.2690; found = 1053.2675.

**MP:** [175-182] °C (decomposition)

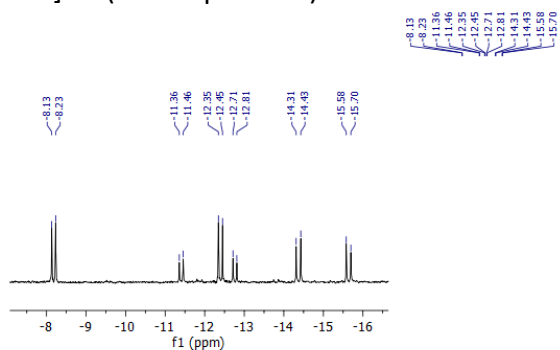

**(R)-Ir-V**  
 $^{31}\text{P}$  NMR (202 MHz,  $\text{CDCl}_3$ )

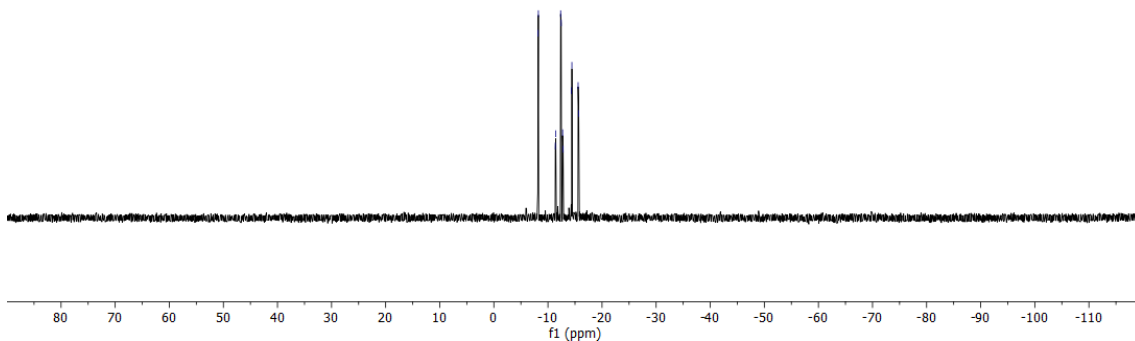

**(R)-Ir-VI:**

**$^{31}\text{P}$  NMR (202 MHz,  $\text{CDCl}_3$ ):**  $\delta$  -8.56 (d,  $J = 20.7$  Hz), -11.87 (d,  $J = 20.1$  Hz), -12.41 (d,  $J = 20.0$  Hz), -12.89 (d,  $J = 19.9$  Hz), -14.56 (d,  $J = 23.7$  Hz), -15.61 (d,  $J = 23.7$  Hz).

**HRMS** ( $\text{H}^+$ ,  $m/z$ ) for  $\text{C}_{54}\text{H}_{47}\text{IrN}_2\text{O}_6\text{P}_2$ : calcd. = 1073.2588; found = 1073.2579.

**MP:** [226-232] °C (decomposition)

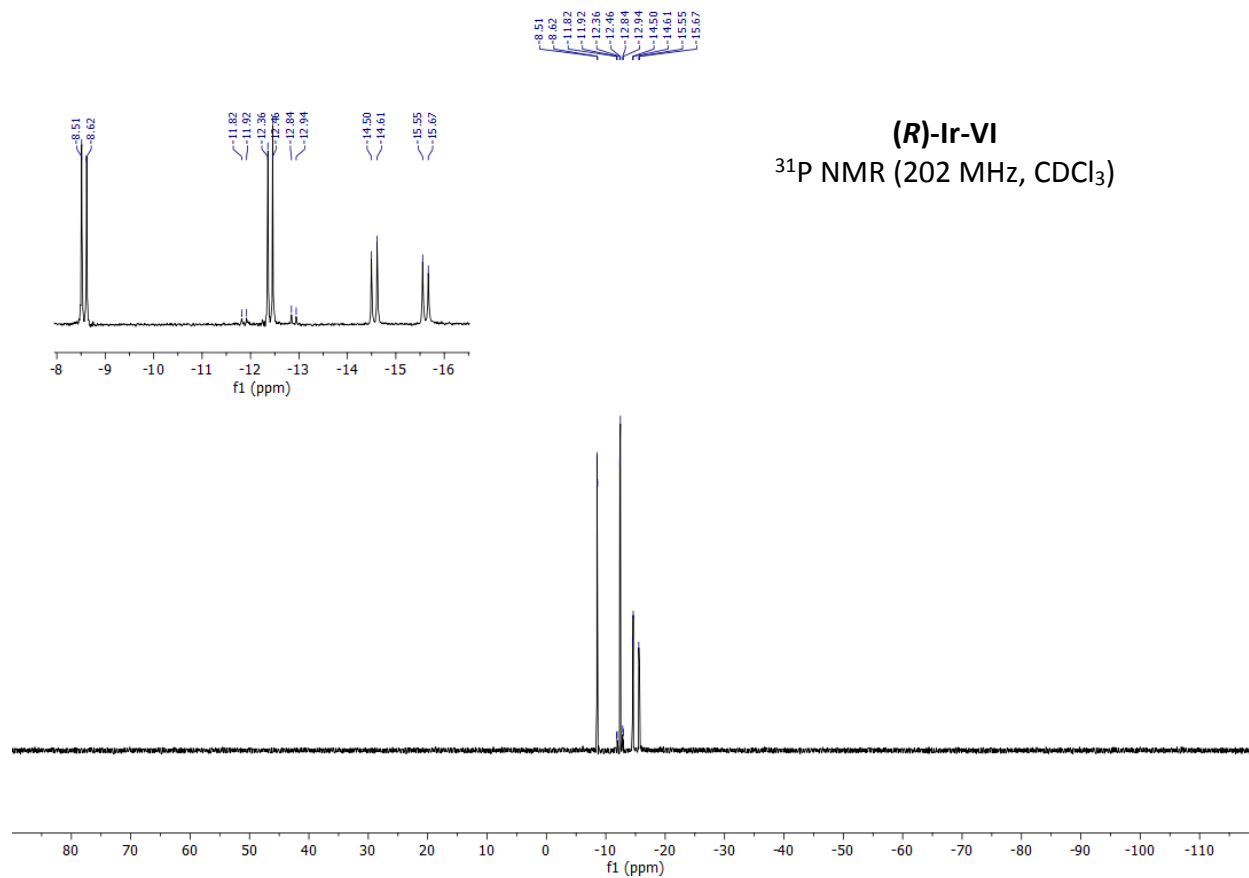

## Synthesis of Phthalimido-Allene 1

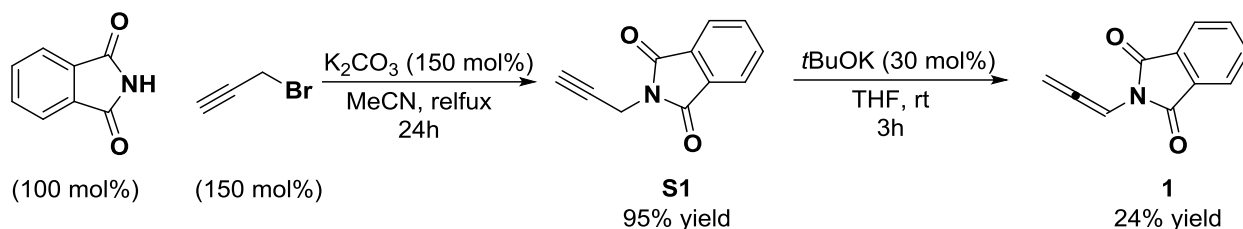

## Synthesis of N-Propargylphthalimide (S1)

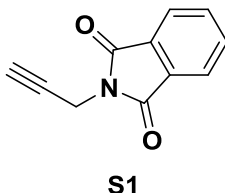

**S1** can also be purchased and used from Combi-Blocks.

To a round-bottomed flask equipped with a magnetic stir bar under an argon atmosphere charged with phthalimide (15.2 g, 103 mmol, 100 mol%) and  $K_2CO_3$  (21.4 g, 155 mmol, 150 mol%) in  $CH_3CN$  (250 mL) was added propargyl bromide (80% wt in PhMe, 23.0 g, 155 mmol, 150 mol%). The reaction mixture was allowed to stir for 24 hours at reflux. The hot reaction mixture was then filtered through a pad of Celite and washed with  $CH_3CN$  (3 x 15 mL). The mixture was then concentrated under reduced pressure. The residue was then solubilized in DCM, resulting in a suspension of starting material which was then filtered off through a pad of Celite. The resulting residue was concentrated under reduced pressure, dissolved in a minimum volume of DCM, and precipitated upon rapid addition of pentane. The product was filtered and washed with pentane, followed by removal of trace amount of solvent in vacuo, to provide a white solid (18.1 g, 97.8 mmol) in 95% yield.

$^1H$  NMR (500 MHz,  $CDCl_3$ )  $\delta$ : 7.88 (dd,  $J = 5.4, 3.1$  Hz, 2H), 7.74 (dd,  $J = 5.5, 3.0$  Hz, 2H), 4.45 (d,  $J = 2.5$  Hz, 1H), 2.22 (t,  $J = 2.5$  Hz, 1H).

$^{13}C$  NMR (125 MHz,  $CDCl_3$ )  $\delta$ : 167.1, 134.4, 132.1, 123.7, 77.3, 71.6, 27.1.

The spectral data recorded for the compound was in complete agreement with the literature.<sup>2</sup>



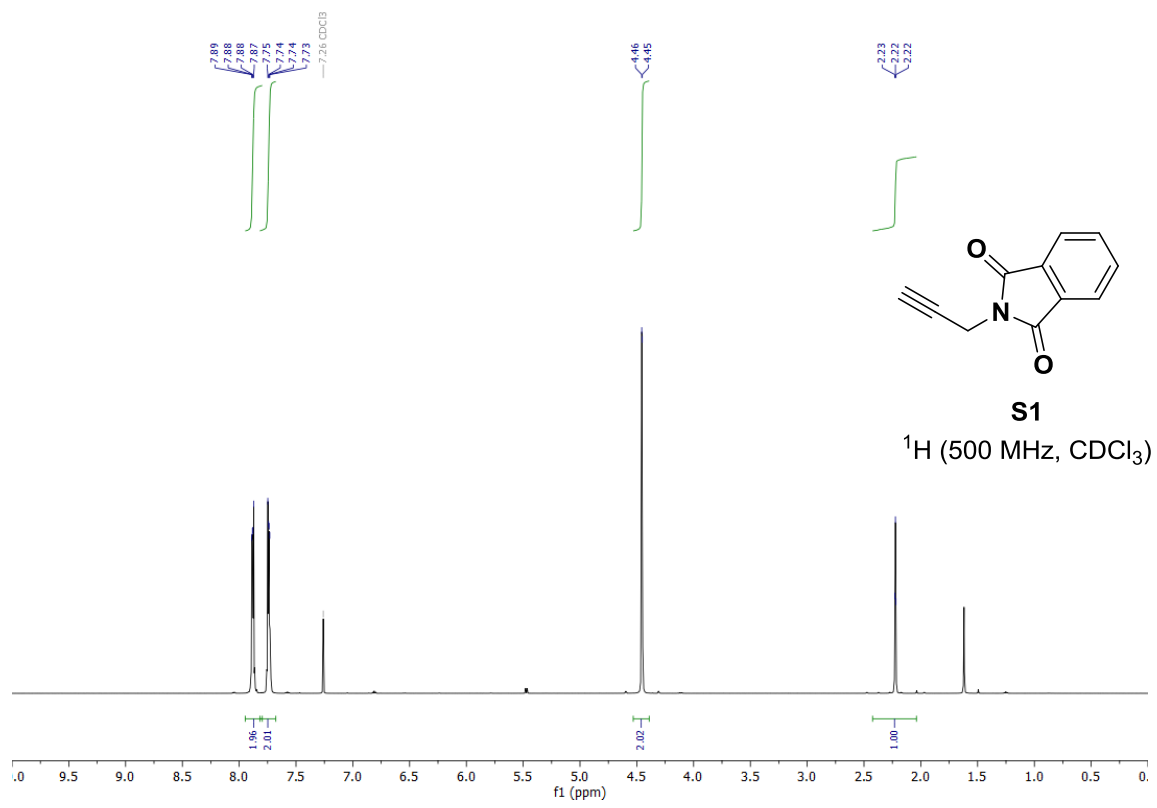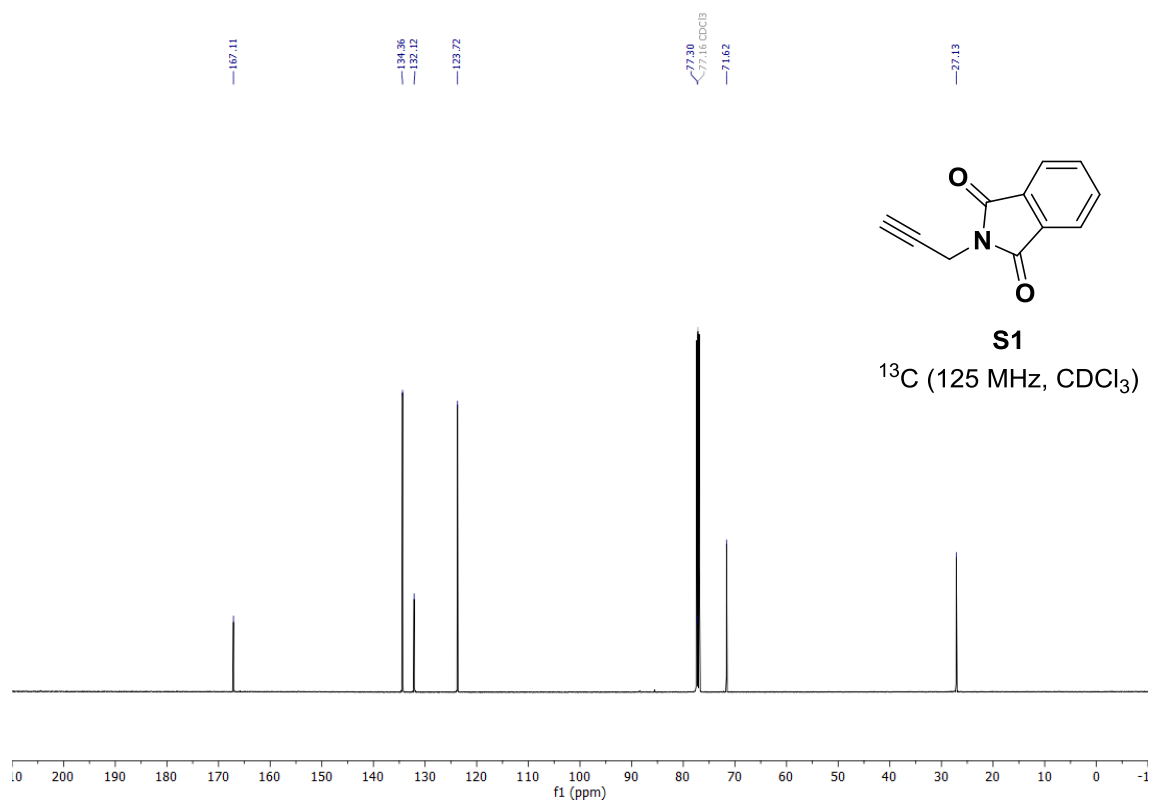

## Synthesis of Phthalimido-Allene (**1**)

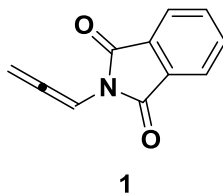

To a round-bottomed flask equipped with a magnetic stir bar under an argon atmosphere charged with N-propargylphthalimide **S1** (9.26 g, 50.0 mmol, 100 mol%) in dried THF (50 mL) was added potassium *tert*-butoxide (1.68 g, 15 mmol, 30 mol%). The reaction mixture was allowed to stir at ambient temperature for 3 hours. The reaction mixture was then filtered through a pad of Celite, washed with THF, and the solvent removed in vacuo. The residue was purified by flash column chromatography (SiO<sub>2</sub>, 0-10% EtOAc in hexanes) to give the phthalimido-allene (2.21 g, 11.9 mmol) as a pale green crystalline solid in 24% yield.

<sup>1</sup>H NMR (500 MHz, CDCl<sub>3</sub>) δ: 7.85 (dd, *J* = 5.4, 3.1 Hz, 2H), 7.73 (dd, *J* = 5.5, 3.0 Hz, 2H), 6.81 (t, *J* = 6.7 Hz, 1H), 5.47 (d, *J* = 6.6 Hz, 1H).

<sup>13</sup>C NMR (125 MHz, CDCl<sub>3</sub>) δ: 204.5, 165.8, 134.4, 133.1, 123.6, 88.4, 85.6.

The spectral data recorded for the compound was in complete agreement with the literature.<sup>3</sup>

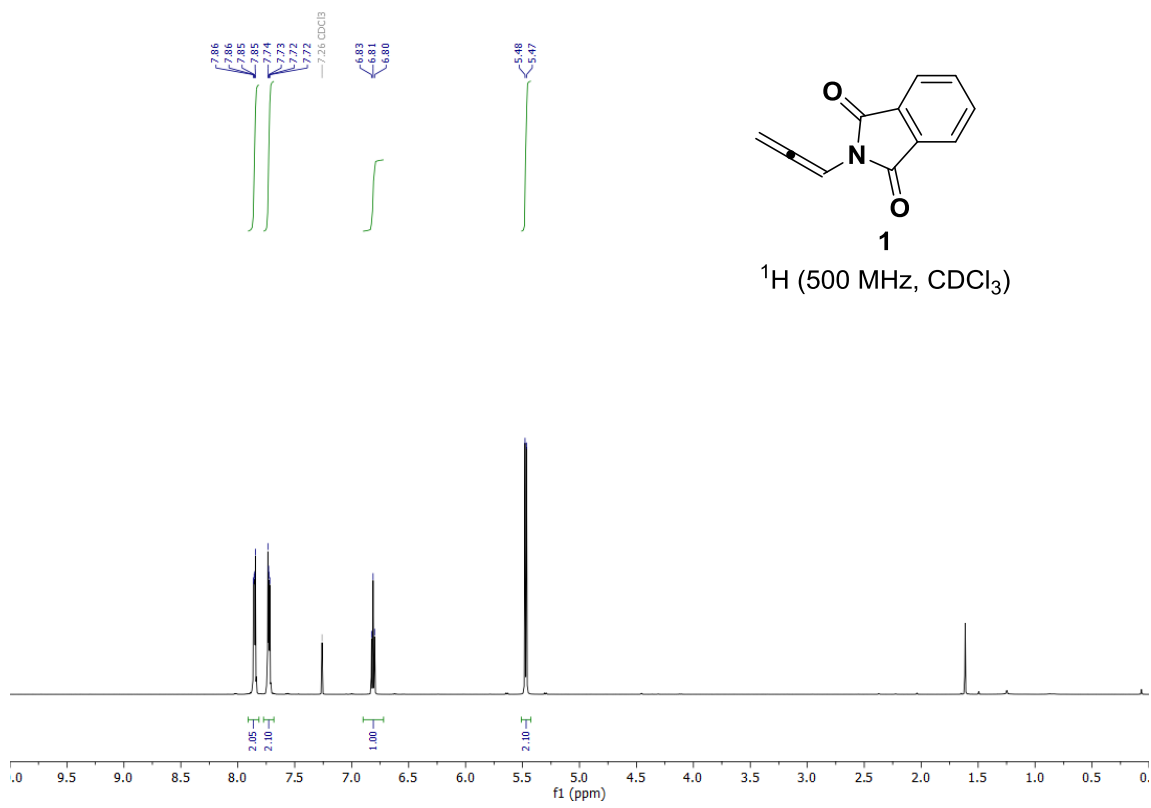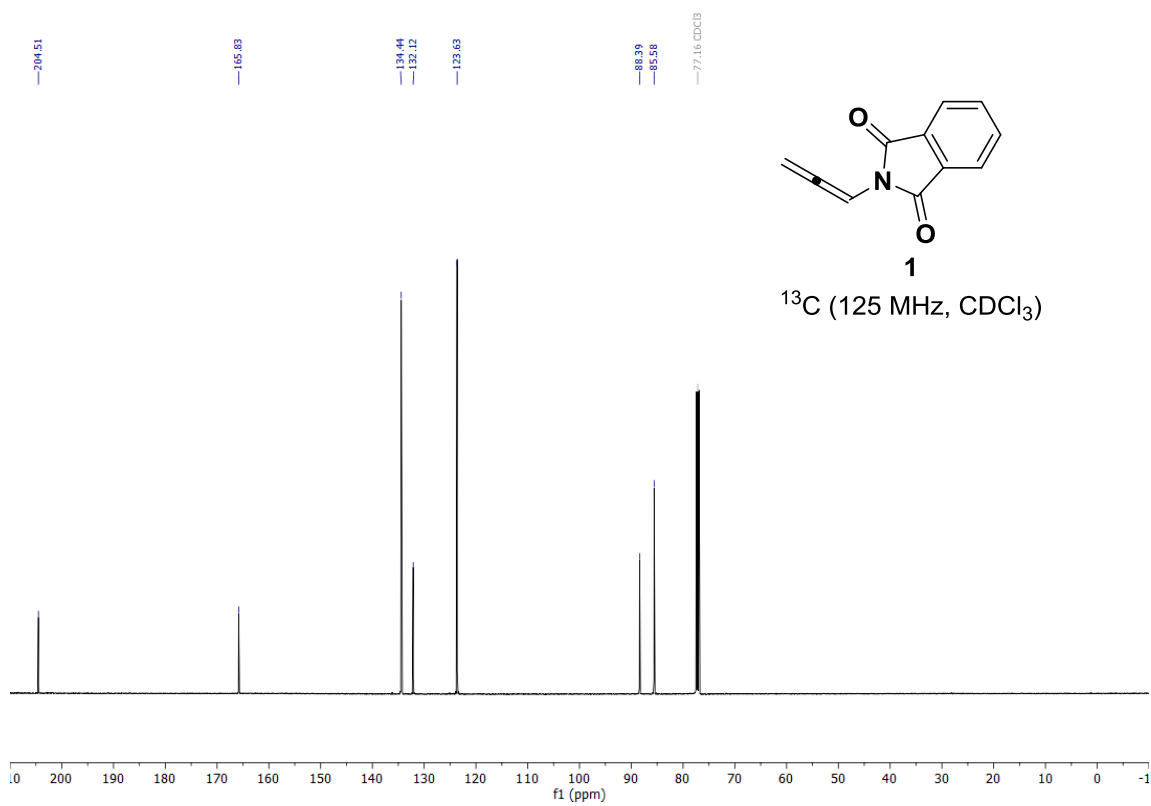

**Procedures and Spectral Data for the Coupling Products of Phthalimido-Allene 1 and Alcohols 3a-3z, 3a'-3c'**

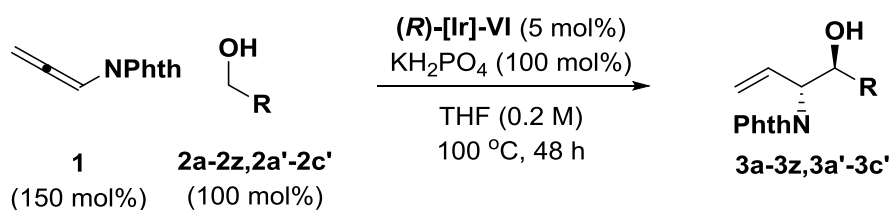

**General Procedure**

To a dried pressure tube with a magnetic stir bar under an argon atmosphere charged with Ir-**VI** (10.7 mg, 0.01 mmol) (5 mol%), phthalimido-allene (55 mg, 0.3 mmol) (150 mol%), alcohol (0.2 mmol) (100 mol%), and  $\text{KH}_2\text{PO}_4$  (27.2 mg, 0.2 mmol) (100 mol%) was added THF (1.0 mL) (0.2 M). The tube was sealed with a PTFE lined cap and the reaction mixture was allowed to stir for 48 hours at 100 °C. After reaching ambient temperature, the solvent was removed in vacuo and the residue was subjected to flash column chromatography ( $\text{SiO}_2$ ) under the noted conditions to furnish the products **3a-3z, 3a'-3c'**.

**2-((3*R*,4*S*)-4-hydroxy-5-phenylpent-1-en-3-yl)isoindoline-1,3-dione (**3a**)**

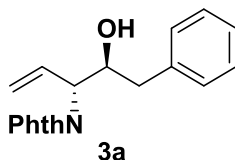

Alcohol **2a** (24.0  $\mu$ L, 0.2 mmol) was subjected to standard reaction conditions (100  $^{\circ}$ C, 48 h). Upon flash column chromatography ( $\text{SiO}_2$ , 20:80 EtOAc:hexanes), the title compound **3a** (48.8 mg, 0.16 mmol, >20:1 dr) was obtained as a light yellow solid in 80% yield.

**TLC** ( $\text{SiO}_2$ )  $R_f$  = 0.35 (20:80 EtOAc:hexanes)

**$^1\text{H}$  NMR** (500 MHz,  $\text{CDCl}_3$ )  $\delta$ : 7.83 (dd,  $J$  = 5.4, 3.1 Hz, 2H), 7.73 (dd,  $J$  = 5.5, 3.0 Hz, 2H), 7.28 – 7.15 (m, 5H), 6.34 (ddd,  $J$  = 17.1, 10.3, 7.9 Hz, 1H), 5.36 (d,  $J$  = 10.7 Hz, 1H), 5.32 (d,  $J$  = 17.1 Hz, 1H), 4.78 – 4.76 (m, 1H), 4.41 (ddd,  $J$  = 7.7, 5.8, 4.7 Hz, 1H), 3.45 (brs, 1H), 2.90 – 2.81 (m, 2H).

**$^{13}\text{C}$  NMR** (125 MHz,  $\text{CDCl}_3$ )  $\delta$ : 168.6, 137.9, 134.4, 131.8, 131.4, 129.4, 128.7, 126.7, 123.7, 120.4, 73.0, 58.7, 40.9.

**HRMS** ( $\text{Na}^+$ ,  $m/z$ ) for  $\text{C}_{19}\text{H}_{17}\text{NO}_3$ : calcd. = 330.1101; found = 330.1104.

**FTIR** (neat): 3549, 1698, 1383, 1334, 1055, 721, 703.

**HPLC**: (Chiralcel column OD-H, Hexane:2-PrOH = 95:5, 1.0 mL/min, 230 nm) ee = 96%.

$[\alpha]_D^{34} = +56.6^{\circ}$  ( $c$  = 1.31,  $\text{CHCl}_3$ ).

**MP** [121 – 126]  $^{\circ}$ C

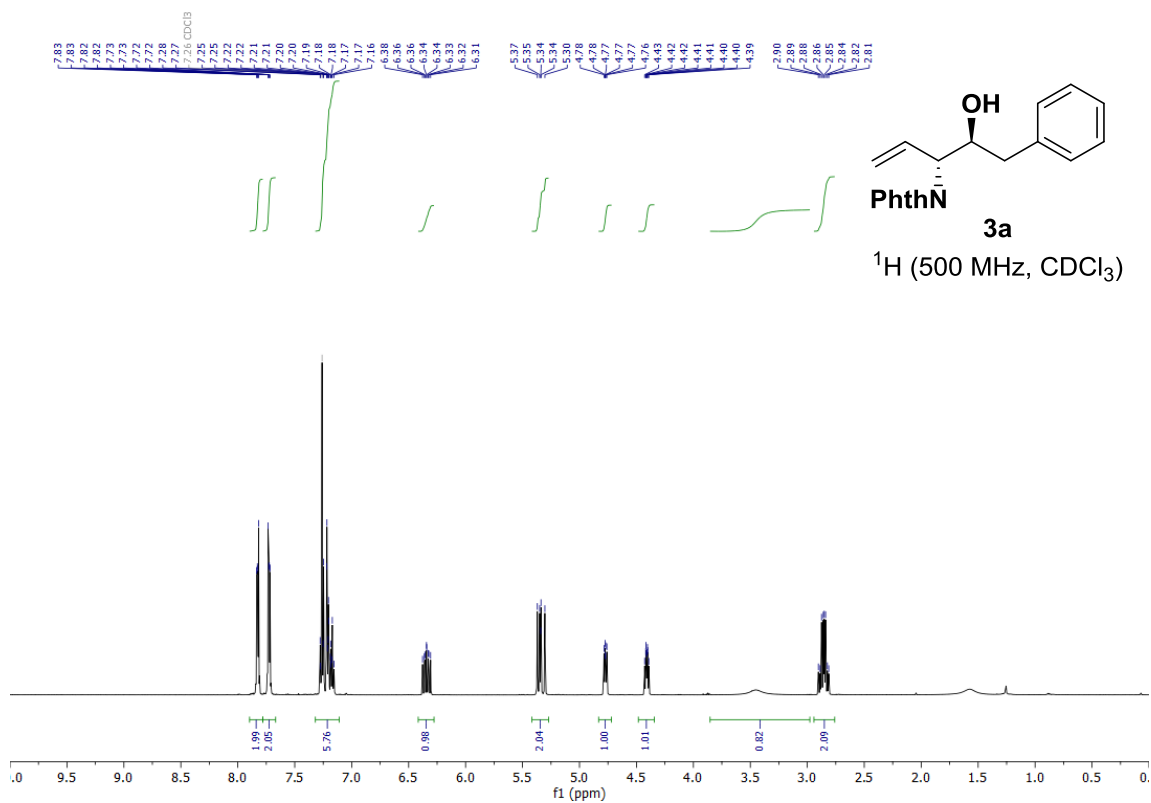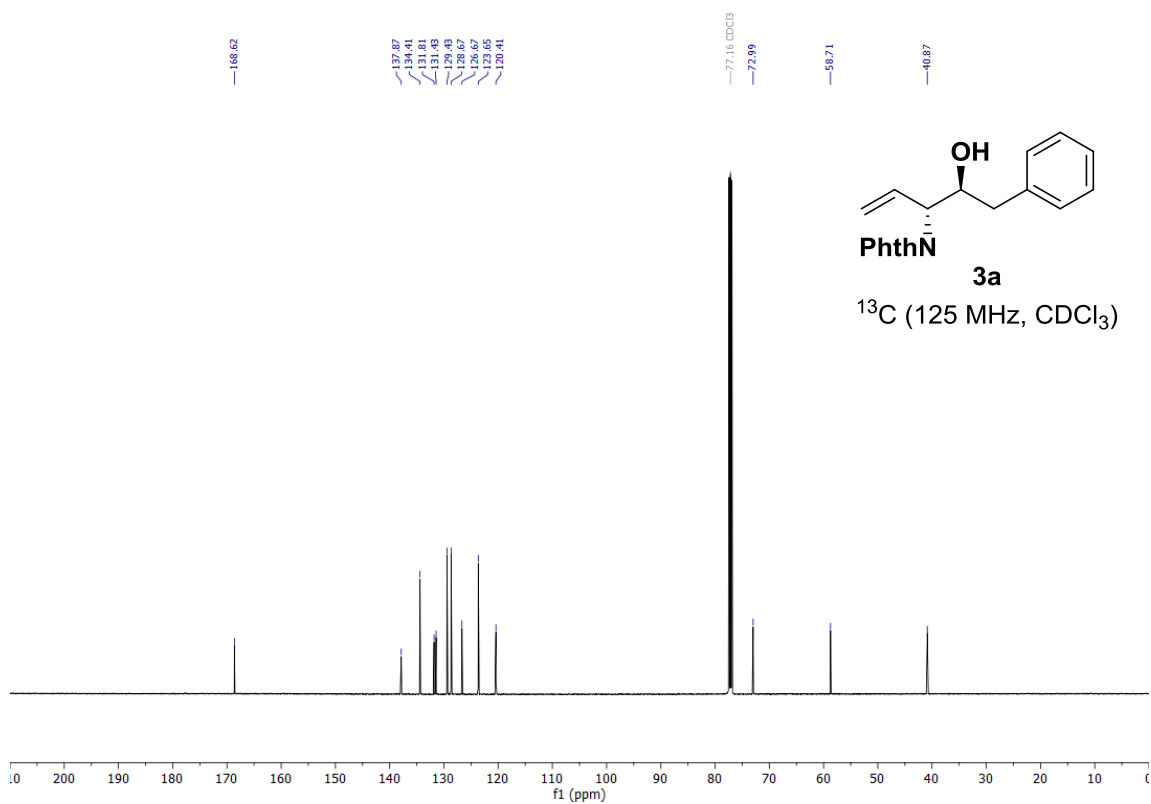

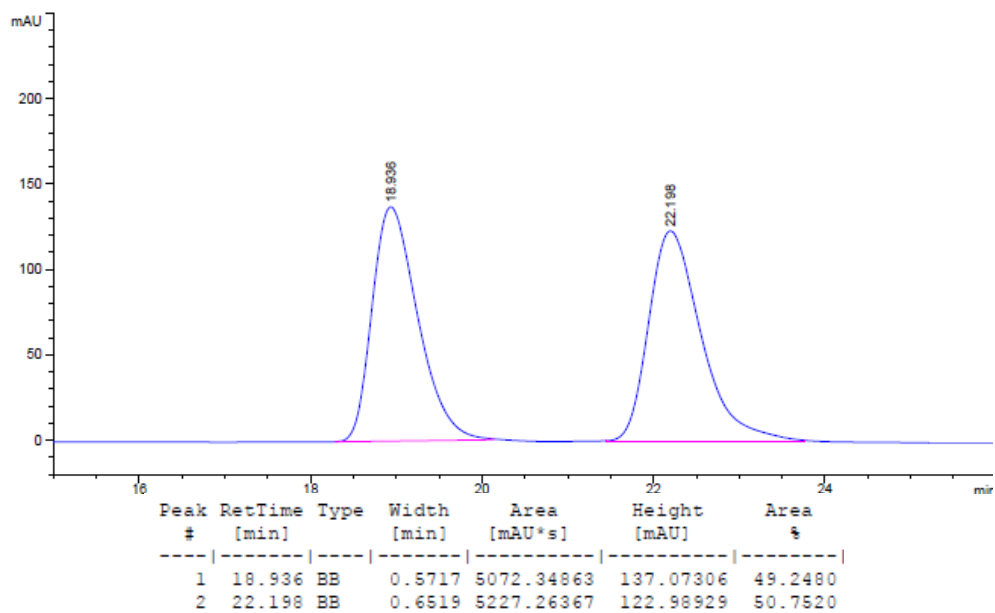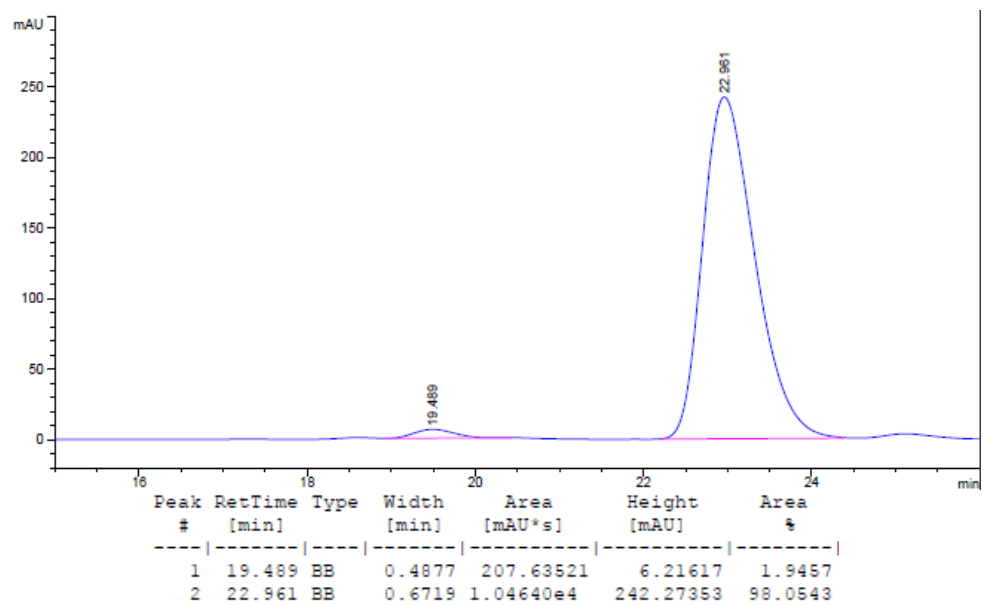

**2-((3R,4S)-5-(4-bromophenyl)-4-hydroxypent-1-en-3-yl)isoindoline-1,3-dione (3b)**

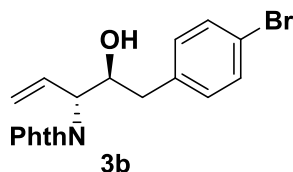

Alcohol **2b** (40.2 mg, 0.2 mmol) was subjected to standard reaction conditions (100 °C, 48 h). Upon flash column chromatography (SiO<sub>2</sub>, 20:80 EtOAc:hexanes), the title compound **3b** (49.9 mg, 0.13 mmol, >20:1 dr) was obtained as a pale yellow oil in 65% yield.

**TLC** (SiO<sub>2</sub>) R<sub>f</sub> = 0.33 (20:80 EtOAc:hexanes)

**<sup>1</sup>H NMR** (500 MHz, CDCl<sub>3</sub>) δ: 7.83 (dd, *J* = 5.4, 3.1 Hz, 2H), 7.71 (dd, *J* = 5.5, 3.0 Hz, 2H), 7.36 (d, *J* = 8.3 Hz, 2H), 7.08 (d, *J* = 8.4 Hz, 2H), 6.32 (ddd, *J* = 17.1, 10.3, 7.9 Hz, 1H), 5.36 (d, *J* = 10.7 Hz, 1H), 5.33 (d, *J* = 17.0 Hz, 1H), 4.75 – 4.72 (m, 1H), 4.39 – 4.35 (m, 1H), 3.47 (brs, 1H), 2.86 – 2.75 (m, 2H).

**<sup>13</sup>C NMR** (125 MHz, CDCl<sub>3</sub>) δ: 168.6, 137.0, 134.5, 131.7, 131.7, 131.3, 131.4, 123.7, 120.7, 120.6, 72.6, 58.9, 40.3.

**HRMS** (H<sup>+</sup>, *m/z*) for C<sub>19</sub>H<sub>16</sub>BrNO<sub>3</sub>: calcd. = 386.0386; found = 386.0380.

**FTIR** (neat): 3454, 2919, 2359, 1700, 1380, 1070, 717.

**HPLC**: (Chiralcel column AS-H, Hexane:2-PrOH = 95:5, 1.0 mL/min, 230 nm) ee = 97%.

$[\alpha]_D^{34} = +47.9^\circ$  (*c* = 0.93, CHCl<sub>3</sub>).



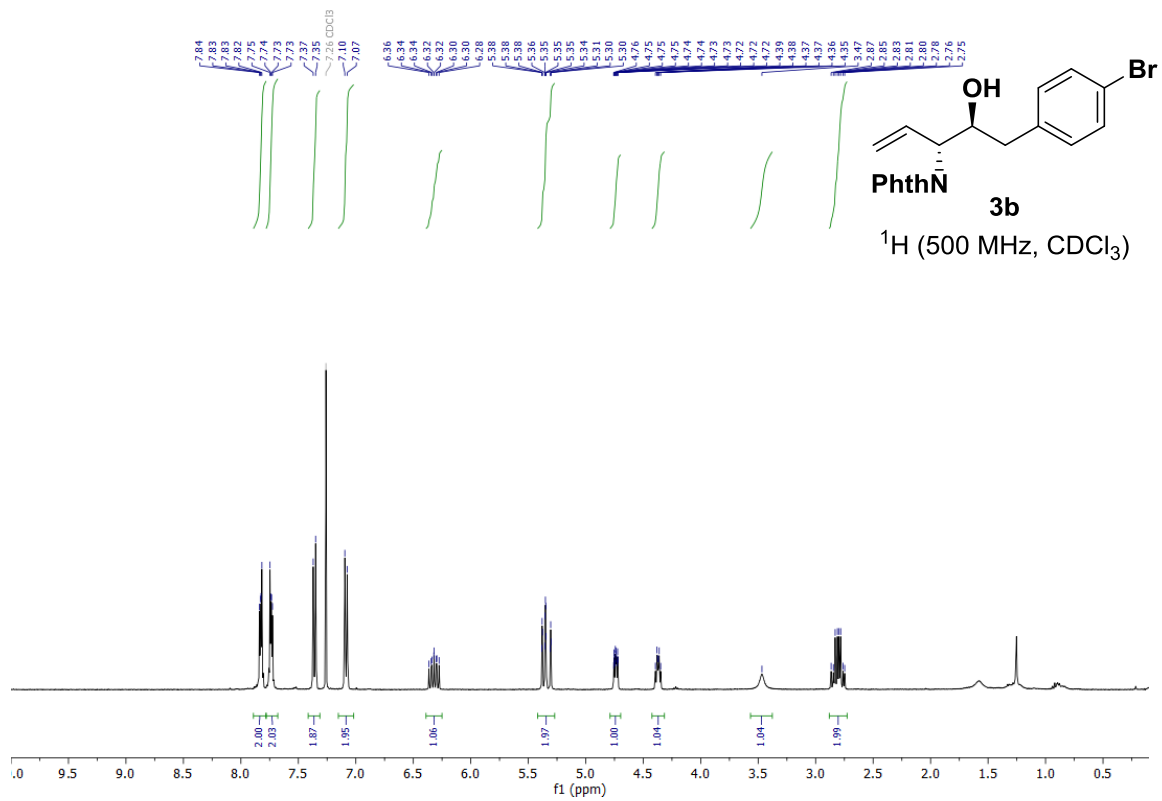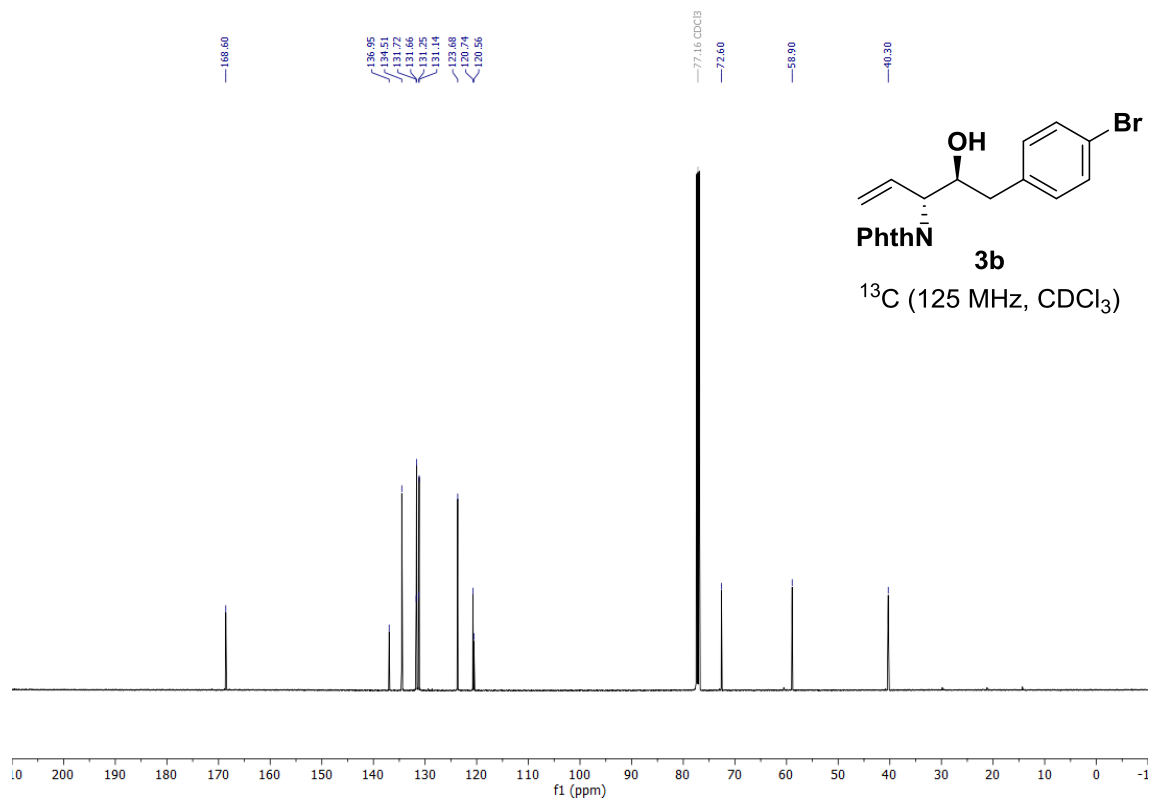

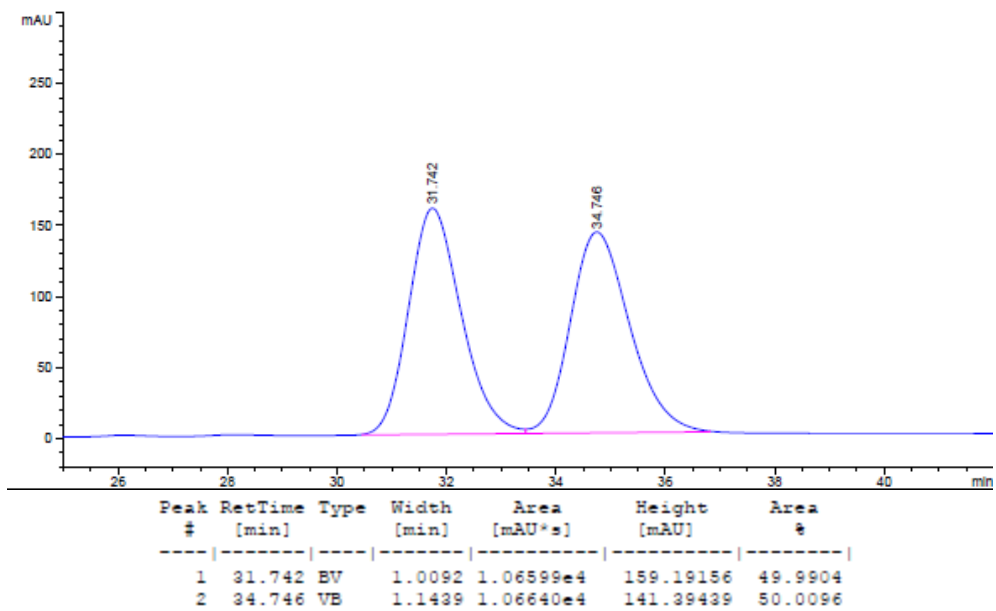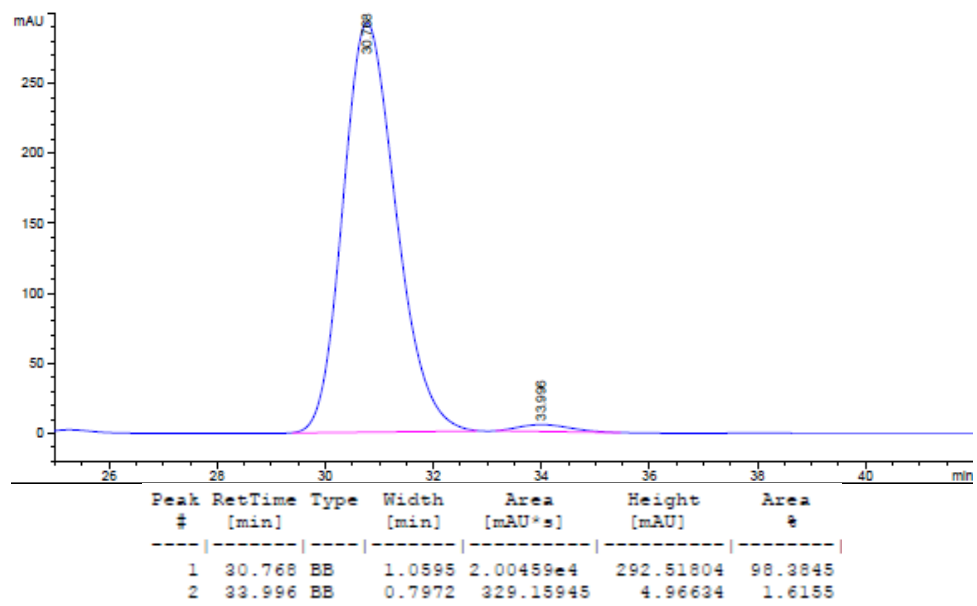

**2-((3*R*,4*S*,*E*)-4-hydroxy-6-phenylhexa-1,5-dien-3-yl)isoindoline-1,3-dione (**3c**)**

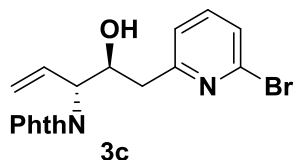

Alcohol **1c** (40.4 mg, 0.2 mmol) was subjected to standard reaction conditions (100 °C, 48 h). Upon flash column chromatography (SiO<sub>2</sub>, 20:80 EtOAc:hexanes), the title compound **3c** (47.1 mg, 0.12 mmol, >20:1 dr) was obtained as a light yellow oil in 61% yield.

**TLC** (SiO<sub>2</sub>) R<sub>f</sub> = 0.31 (40:60 EtOAc:hexanes)

**<sup>1</sup>H NMR** (500 MHz, CDCl<sub>3</sub>) δ: 7.84 (dd, *J* = 5.4, 3.1 Hz, 2H), 7.74 (dd, *J* = 5.5, 3.0 Hz, 2H), 7.44 (t, *J* = 7.7 Hz, 1H), 7.31 (d, *J* = 7.9 Hz, 1H), 7.12 (d, *J* = 7.5 Hz, 1H), 6.39 (ddd, *J* = 17.7, 10.3, 7.7 Hz, 1H), 5.35 – 5.30 (m, 2H), 4.79 (dd, *J* = 7.9, 5.3 Hz, 1H), 4.64 (dt, *J* = 8.1, 4.8 Hz, 1H), 3.01 – 2.93 (m, 2H).

**<sup>13</sup>C NMR** (125 MHz, CDCl<sub>3</sub>) δ: 168.5, 160.3, 141.4, 138.9, 134.4, 131.8, 131.7, 126.2, 123.7, 123.1, 120.2, 71.3, 58.8, 41.4.

**HRMS** (H<sup>+</sup>, *m/z*) for C<sub>18</sub>H<sub>15</sub>BrN<sub>2</sub>O<sub>3</sub>: calcd. = 387.0339; found = 387.0334.

**FTIR** (neat): 3446, 1704, 1380, 1064, 751, 718.

**HPLC**: (Chiralcel column AD-H, Hexane:2-PrOH = 95:5, 1.0 mL/min, 230 nm) ee = 96%.

$[\alpha]_D^{24} = +47.5^\circ$  (*c* = 0.80, CHCl<sub>3</sub>).

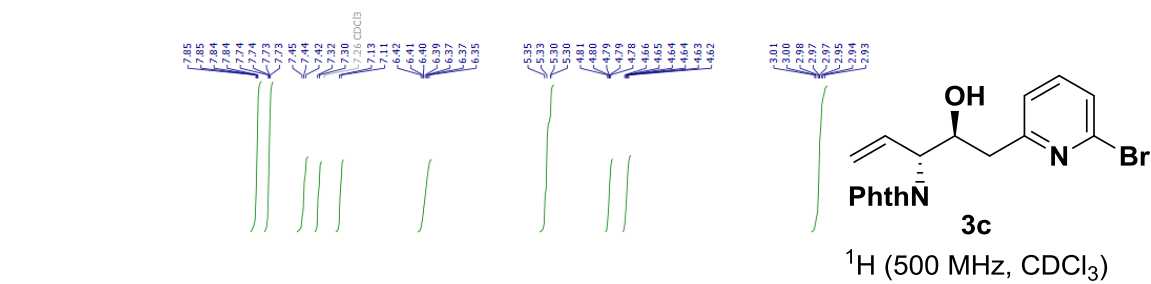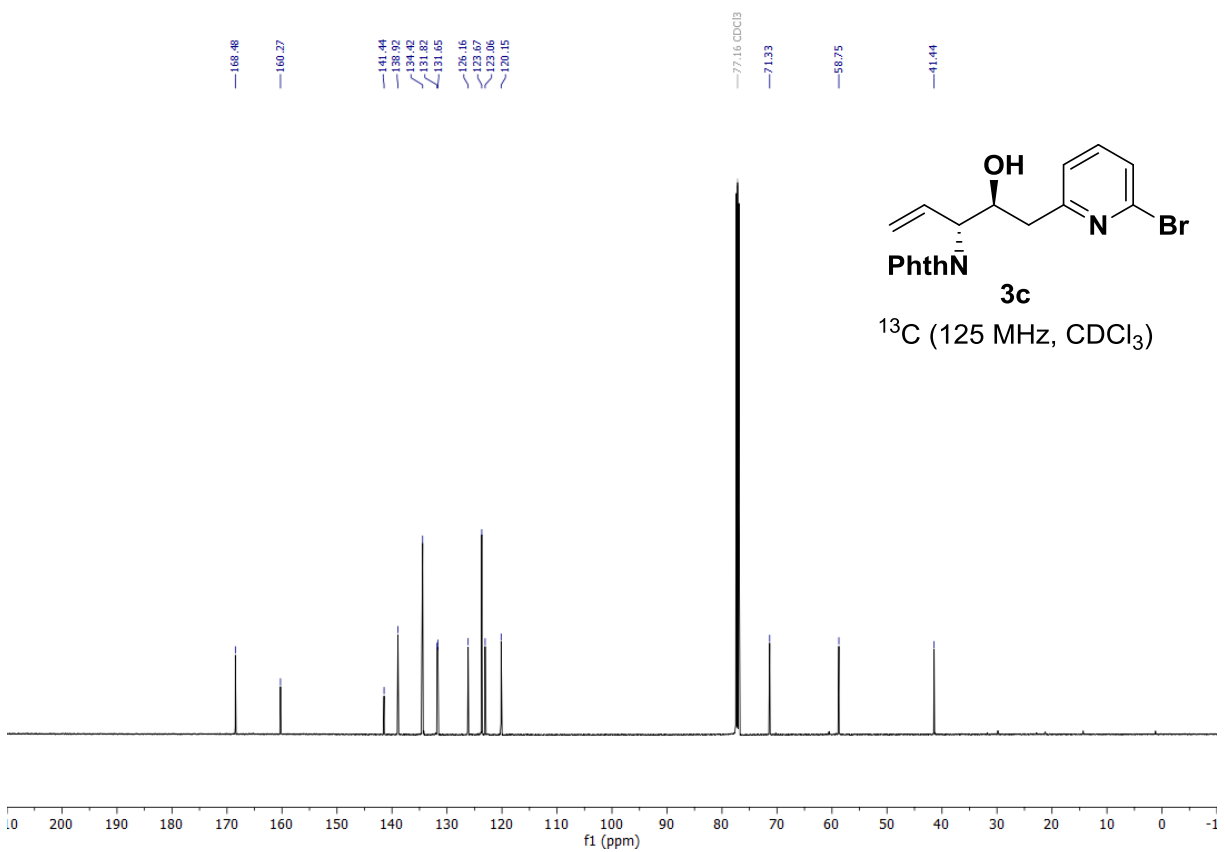

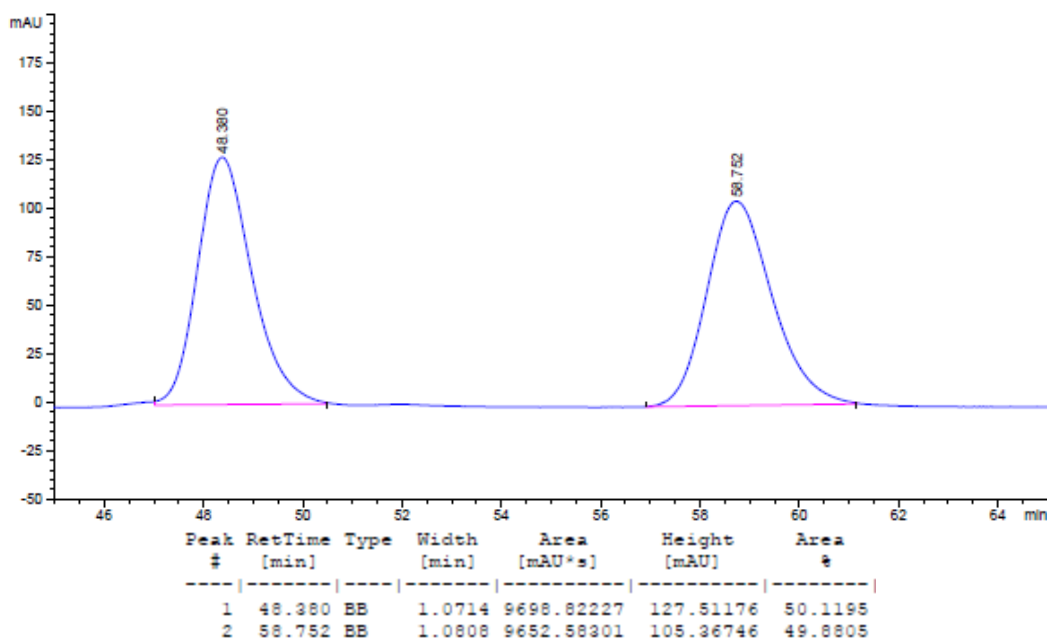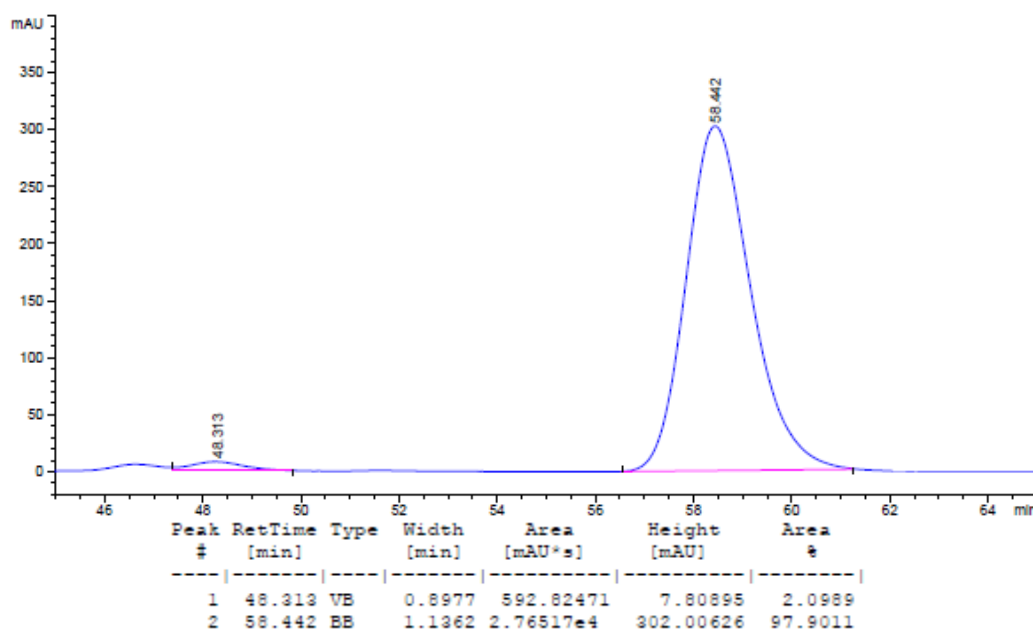

**2-((3*R*,4*S*)-4-hydroxy-5-(thiophen-2-yl)pent-1-en-3-yl)isoindoline-1,3-dione (**3d**)**

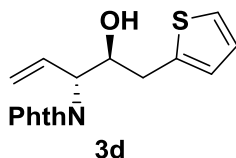

Alcohol **2d** (25.6 mg, 0.2 mmol) was subjected to standard reaction conditions (100 °C, 48 h). Upon flash column chromatography (SiO<sub>2</sub>, 20:80 EtOAc:hexanes), the title compound **3d** (42.0 mg, 0.13 mmol, >20:1 dr) was obtained as a white solid in 67% yield.

**TLC** (SiO<sub>2</sub>) R<sub>f</sub> = 0.28 (20:80 EtOAc:hexanes)

**<sup>1</sup>H NMR** (500 MHz, CDCl<sub>3</sub>) δ 7.84 (dd, *J* = 5.3, 3.1 Hz, 2H), 7.74 (dd, *J* = 5.4, 3.0 Hz, 2H), 7.15 (d, *J* = 5.1 Hz, 1H), 6.94 – 6.91 (m, 1H), 6.86 (d, *J* = 3.1 Hz, 1H), 6.37 – 6.27 (m, 1H), 5.34 (dd, *J* = 19.6, 13.7 Hz, 2H), 4.80 (dd, *J* = 7.8, 4.3 Hz, 1H), 4.43 – 4.32 (m, 1H), 3.76 (s, 1H), 3.08 (d, *J* = 6.6 Hz, 2H).

**<sup>13</sup>C NMR** (125 MHz, CDCl<sub>3</sub>) δ 168.6, 139.8, 134.5, 131.8, 131.0, 127.0, 126.3, 124.5, 123.7, 120.6, 77.2, 73.1, 58.4, 34.9.

**HRMS** (Na<sup>+</sup>, *m/z*) for C<sub>17</sub>H<sub>15</sub>NO<sub>3</sub>S: calcd. = 336.0665; found = 336.0667.

**FTIR** (neat): 3451, 2360, 2341, 1703, 1381, 1261, 1063, 749.

**HPLC**: (Chiralcel column OD-H, Hexane:2-PrOH = 95:5, 1.0 mL/min, 230 nm) ee = 92%.

$[\alpha]_D^{34} = +72.3^\circ$  (*c* = 0.4, CHCl<sub>3</sub>).

**MP**: [80 – 84] °C

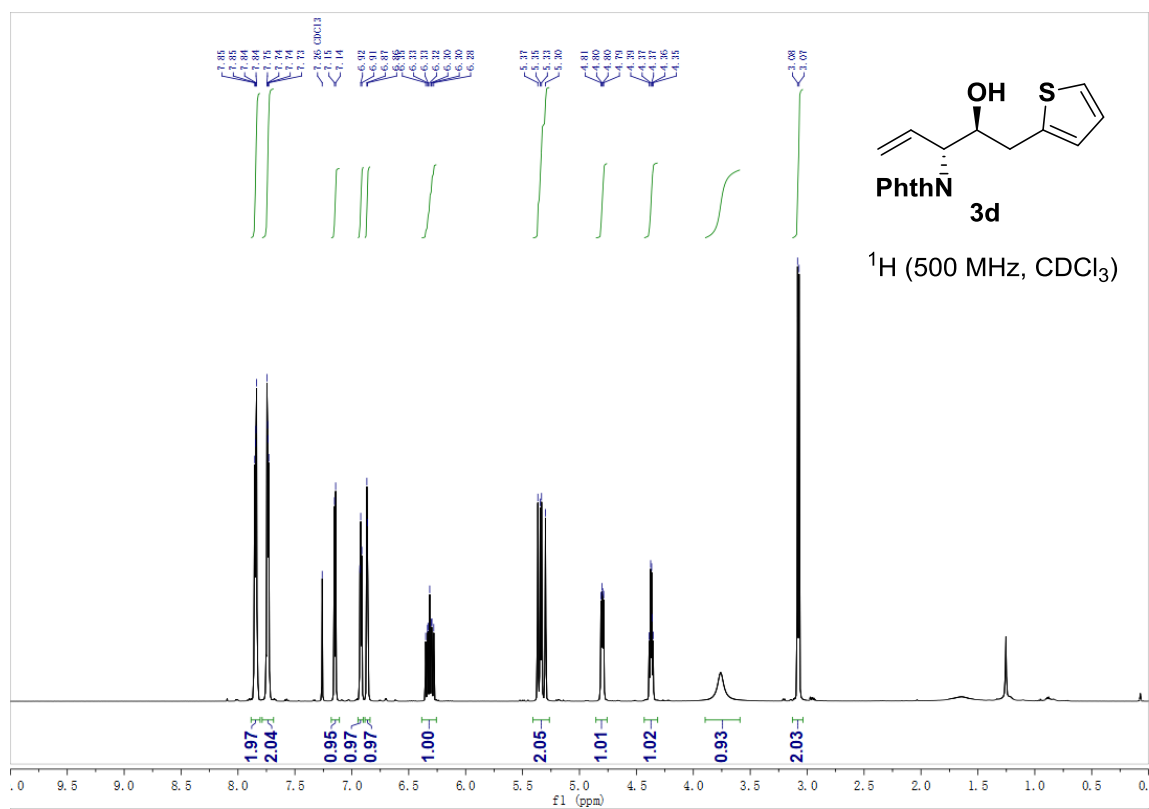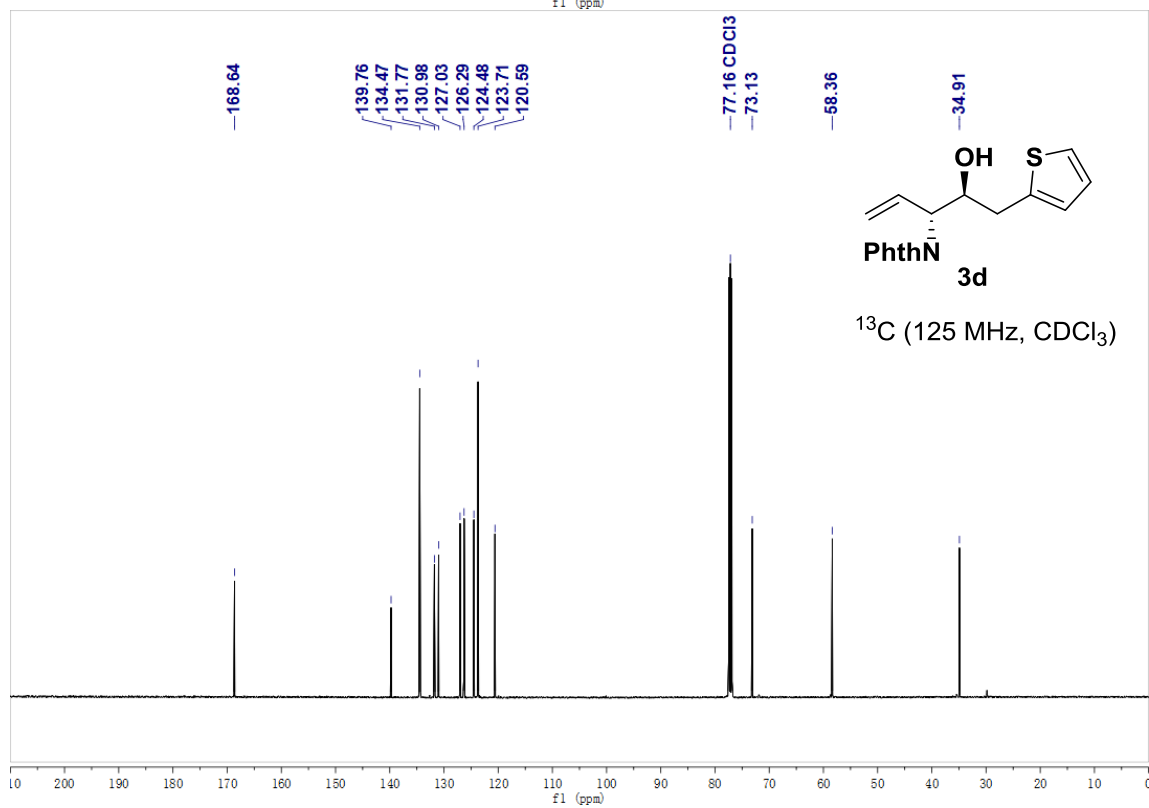

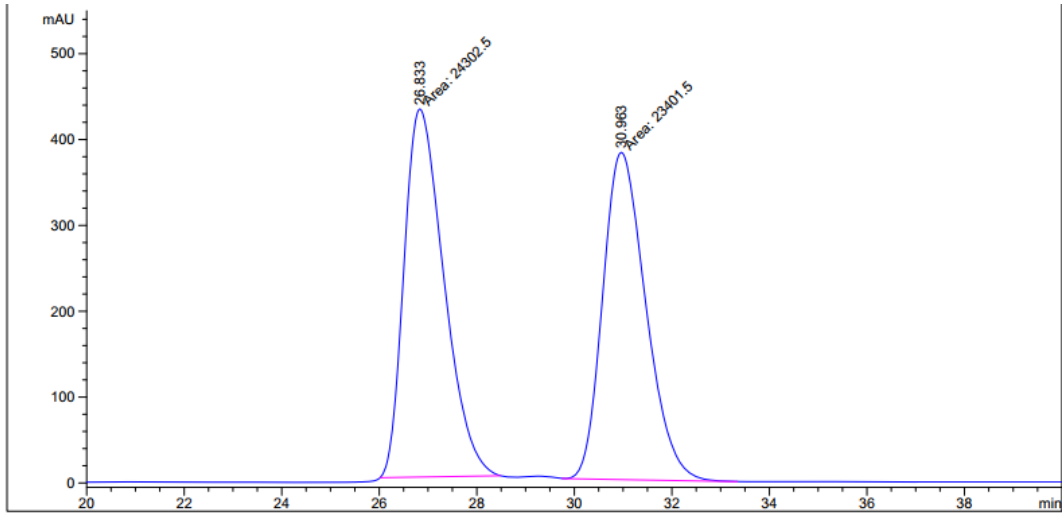

| Peak # | RetTime [min] | Type | Width [min] | Area [mAU*s] | Height [mAU] | Area %  |
|--------|---------------|------|-------------|--------------|--------------|---------|
| 1      | 26.833        | MM   | 0.9451      | 2.43025e4    | 428.55585    | 50.9444 |
| 2      | 30.963        | MM   | 1.0235      | 2.34015e4    | 381.08691    | 49.0556 |

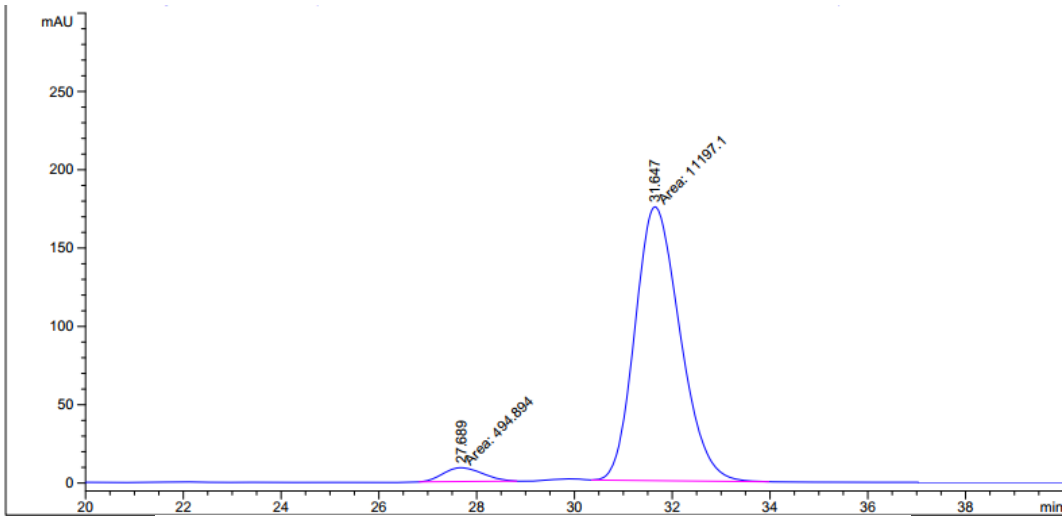

| Peak # | RetTime [min] | Type | Width [min] | Area [mAU*s] | Height [mAU] | Area %  |
|--------|---------------|------|-------------|--------------|--------------|---------|
| 1      | 27.689        | MM   | 0.9312      | 494.89352    | 8.85730      | 4.2327  |
| 2      | 31.647        | MM   | 1.0678      | 1.11971e4    | 174.77449    | 95.7673 |



**2-((3*R*,4*S*)-4-hydroxy-5-(5-methyl-2-phenyloxazol-4-yl)pent-1-en-3-yl)isoindoline-1,3-dione (3e)**

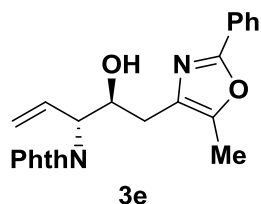

Alcohol **2e** (40.6 mg, 0.2 mmol) was subjected to standard reaction conditions with 7.5 mol% catalyst (100 °C, 48 h). Upon flash column chromatography (SiO<sub>2</sub>, 20:80 EtOAc:hexanes), the title compound **3e** (54.9 mg, 0.14 mmol, >20:1 dr) was obtained as a white solid in 71% yield.

**TLC** (SiO<sub>2</sub>) R<sub>f</sub> = 0.4 (40:60 EtOAc:hexanes)

**<sup>1</sup>H NMR** (500 MHz, CDCl<sub>3</sub>) δ 7.93-7.91 (m, 2H), 7.82-7.81 (m, 2H), 7.70-7.69 (m, 2H), 7.42-7.39 (m, 3H), 6.41 (ddd, *J* = 17.1, 10.3, 7.6 Hz, 1H), 5.32 (ddt, *J* = 7.4, 3.0, 1.2 Hz, 2H), 4.79 (ddt, *J* = 7.5, 6.2, 1.1 Hz, 1H), 4.61 (td, *J* = 6.7, 4.9 Hz, 1H), 2.70 (ddd, *J* = 4.8, 15.0, 37.7 Hz, 2H), 2.23 (s, 3H), 1.64 (bs, 1H).

**<sup>13</sup>C NMR** (125 MHz, CDCl<sub>3</sub>) δ 168.4, 159.6, 145.0, 134.3, 132.5, 132.3, 131.8, 130.2, 128.8, 127.4, 126.2, 123.5, 119.7, 70.9, 58.3, 29.8, 10.3.

**HRMS** (H<sup>+</sup>, *m/z*) for C<sub>23</sub>H<sub>21</sub>N<sub>2</sub>O<sub>4</sub>: calcd. = 389.1496; found = 389.1499.

**FTIR** (neat): 2923, 2853, 1710, 1382, 1334, 1066, 718, 692.

**HPLC**: (Chiralcel column OD-H, Hexane:2-PrOH = 90:10, 1.0 mL/min, 230 nm) ee = 96%.

[α]<sub>D</sub><sup>34</sup> = +23.8° (c = 1.3, CHCl<sub>3</sub>).

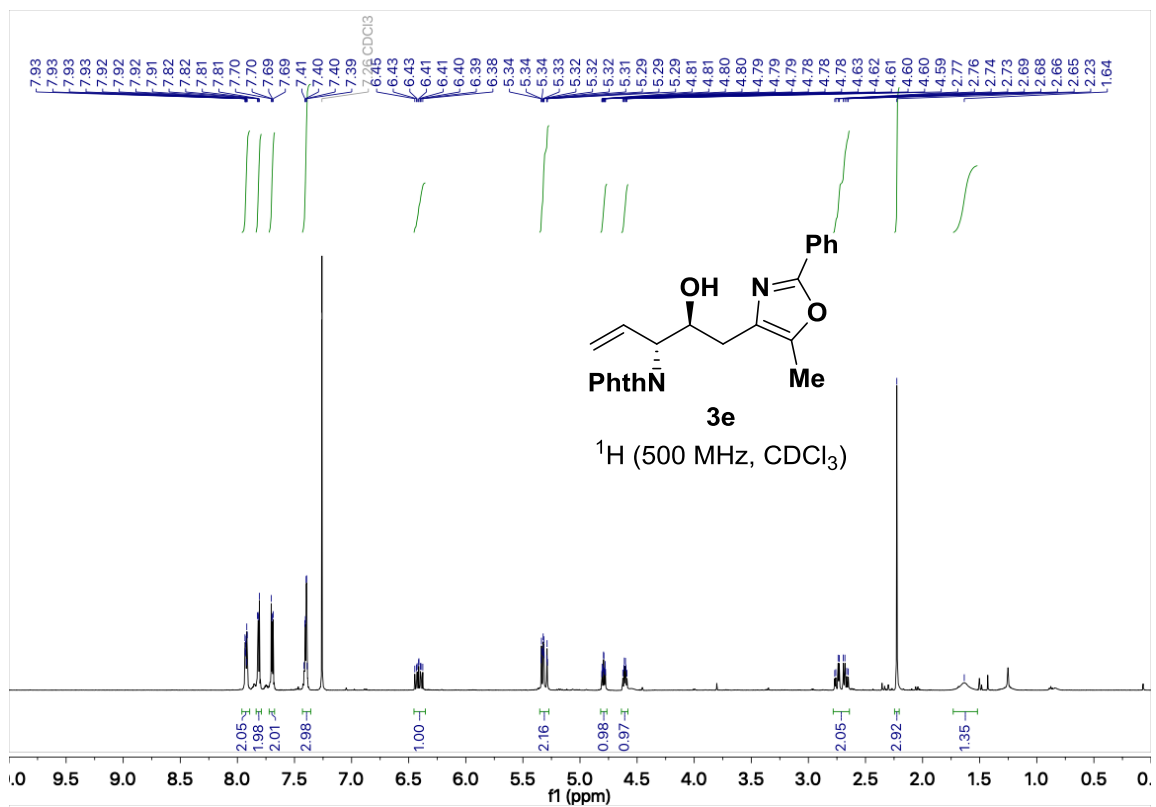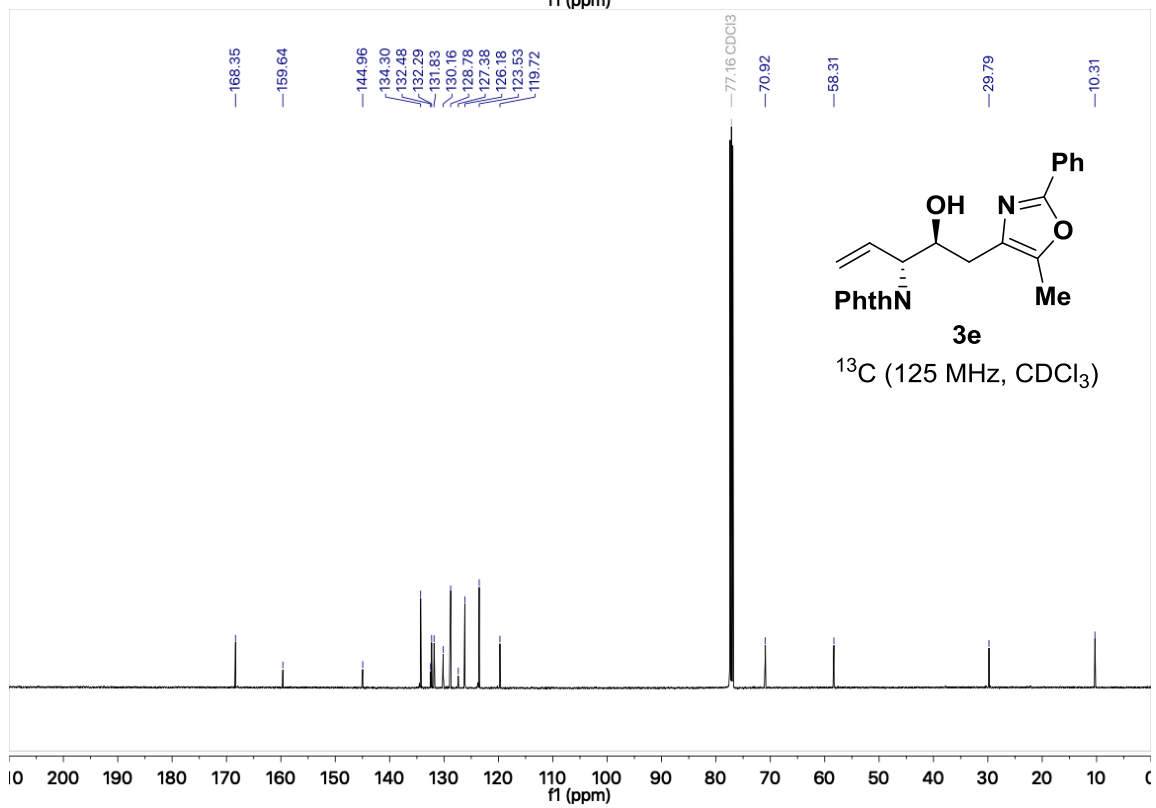

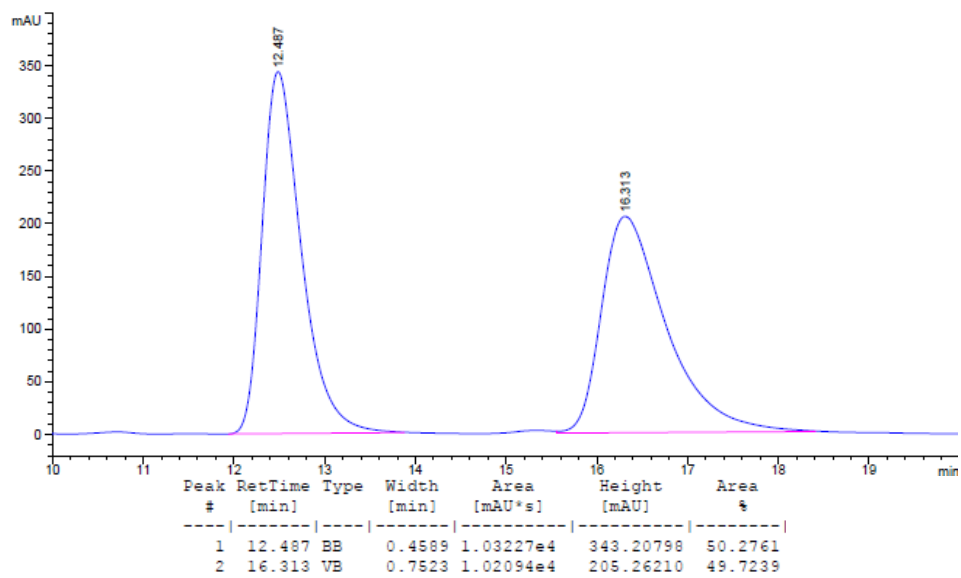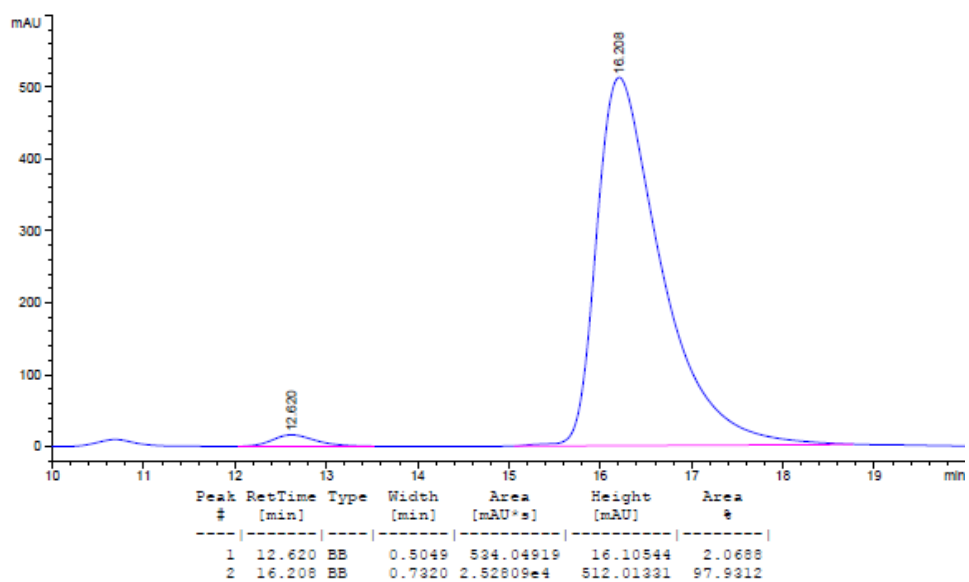

**2-((3*R*,4*S*)-4-hydroxy-5-(4-methylthiazol-5-yl)pent-1-en-3-yl)isoindoline-1,3-dione (**3f**)**

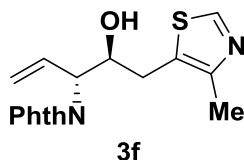

Alcohol **2f** (28.6 mg, 0.2 mmol) was subjected to standard reaction conditions with longer reaction time (100 °C, 72 h). Upon flash column chromatography (SiO<sub>2</sub>, 50:50 EtOAc:hexanes), the title compound **3f** (47.0 mg, 0.144 mmol, >20:1 dr) was obtained as a white solid in 72% yield.

**TLC** (SiO<sub>2</sub>) R<sub>f</sub> = 0.29 (60:40 EtOAc:hexanes)

**<sup>1</sup>H NMR** (500 MHz, CDCl<sub>3</sub>) δ 8.55 (s, 1H), 7.84 (dd, *J* = 5.4, 3.1 Hz, 2H), 7.74 (dd, *J* = 5.4, 3.0 Hz, 2H), 6.37 – 6.24 (m, 1H), 5.41 – 5.23 (m, 2H), 4.75 (dd, *J* = 7.9, 4.4 Hz, 1H), 4.31 (dt, *J* = 7.9, 5.0 Hz, 1H), 4.09 (d, *J* = 6.8 Hz, 1H), 3.03 – 2.92 (m, 2H), 2.34 (s, 3H).

**<sup>13</sup>C NMR** (125 MHz, CDCl<sub>3</sub>) δ 168.6, 150.4, 150.0, 134.6, 131.7, 130.9, 127.0, 123.7, 120.8, 72.6, 58.7, 31.4, 15.2.

**HRMS** (H<sup>+</sup>, *m/z*) for C<sub>17</sub>H<sub>17</sub>N<sub>2</sub>O<sub>3</sub>S: calcd. = 329.0954; found = 329.0957.

**FTIR** (neat): 3724, 3004, 2360, 2341, 1706, 1275, 260, 750, 669.

**HPLC**: (Chiralcel column OD-H, Hexane:2-PrOH = 95:5, 1.0 mL/min, 230 nm) ee = 94%.

[α]<sub>D</sub><sup>34</sup> = +15.7° (c = 0.87, CHCl<sub>3</sub>).

**MP**: [118-120] °C

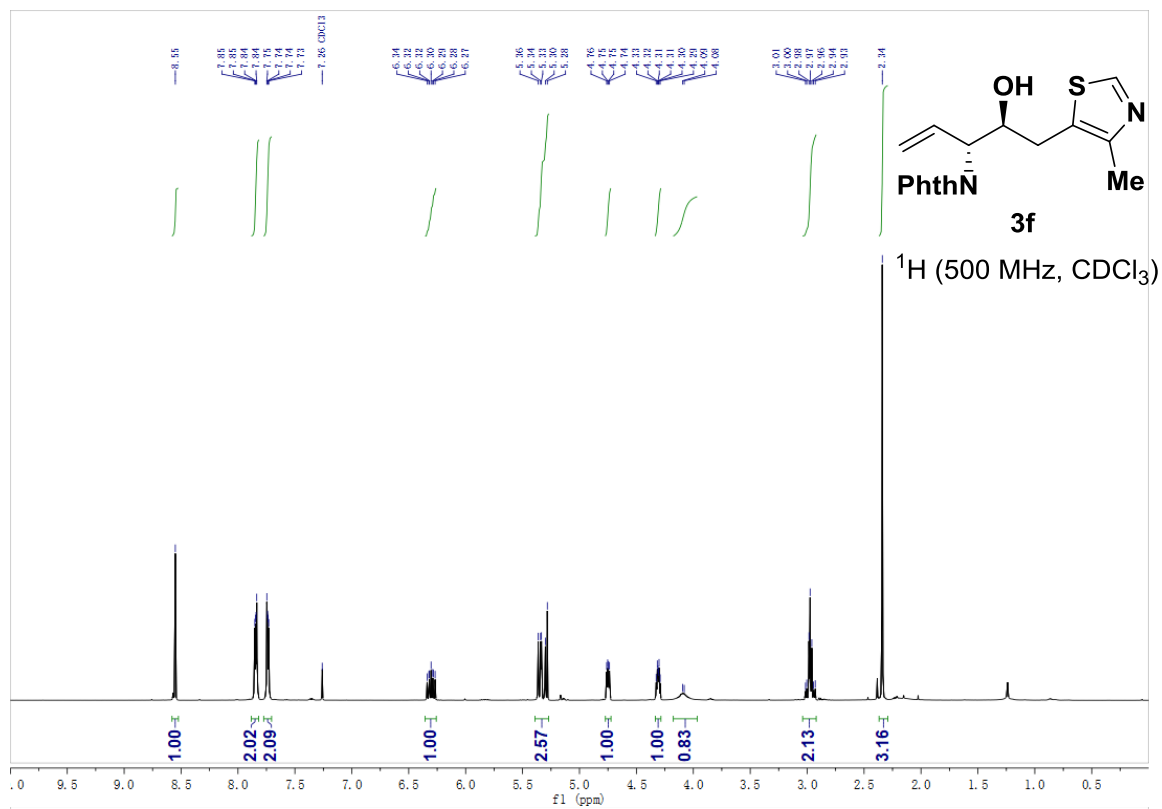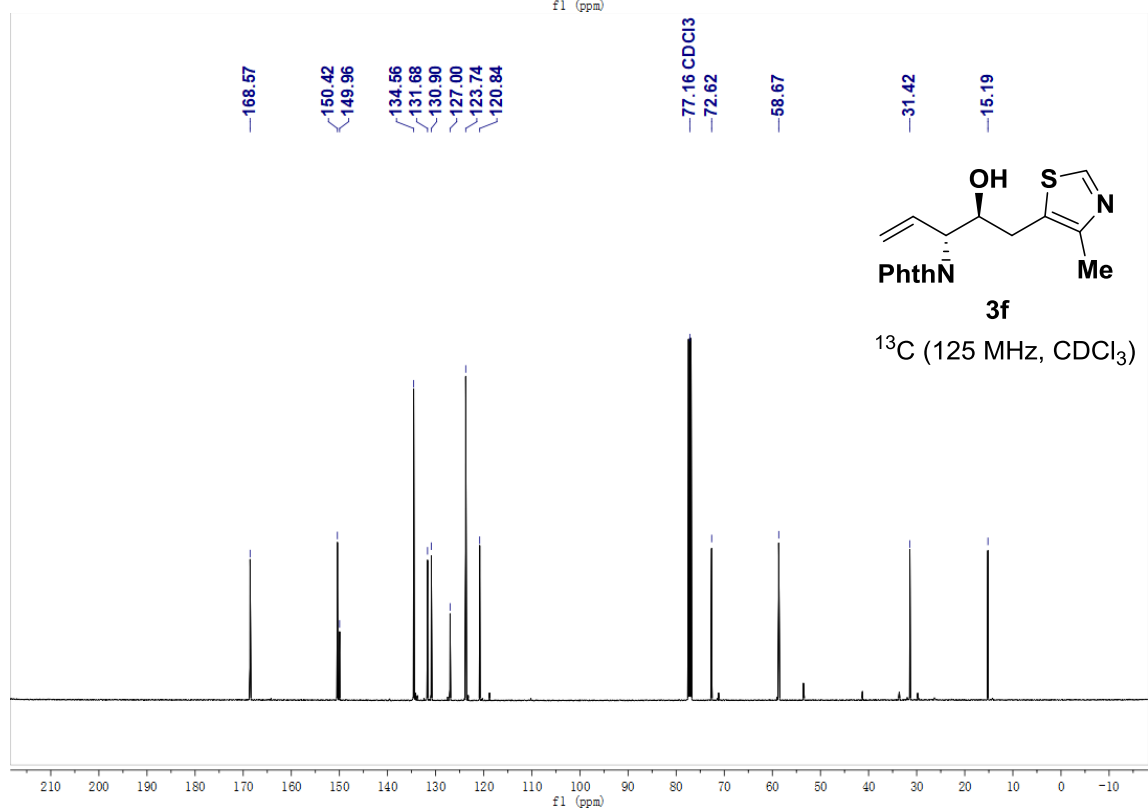

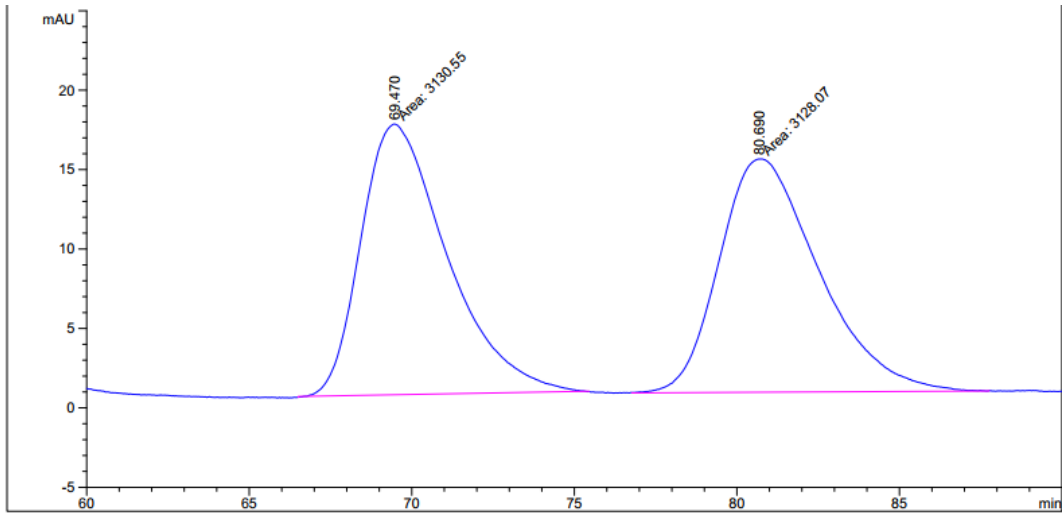

| Peak # | RetTime [min] | Type | Width [min] | Area [mAU*s] | Height [mAU] | Area %  |
|--------|---------------|------|-------------|--------------|--------------|---------|
| 1      | 69.470        | MM   | 3.0613      | 3130.54517   | 17.04343     | 50.0198 |
| 2      | 80.690        | MM   | 3.5493      | 3128.07153   | 14.68869     | 49.9802 |

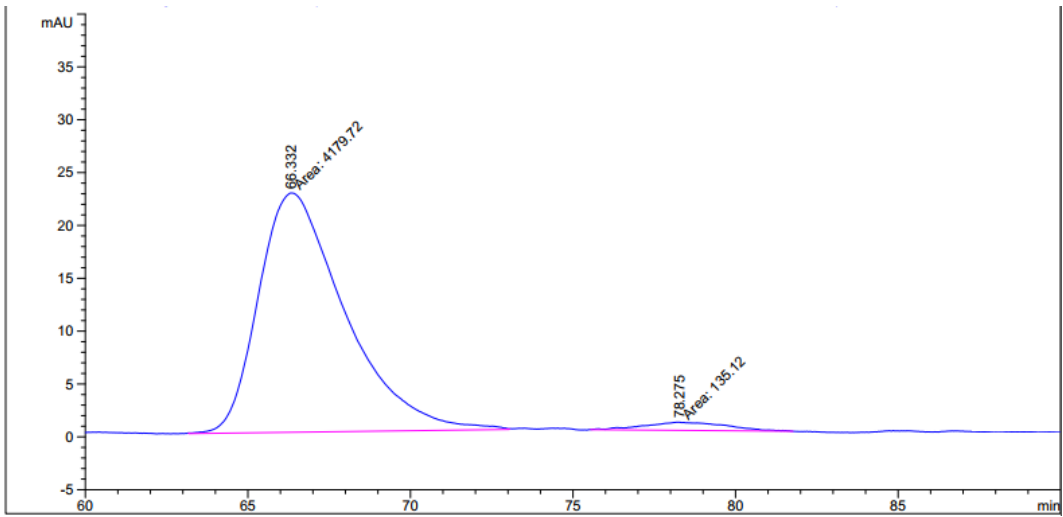

| Peak # | RetTime [min] | Type | Width [min] | Area [mAU*s] | Height [mAU] | Area %  |
|--------|---------------|------|-------------|--------------|--------------|---------|
| 1      | 66.332        | MM   | 3.0769      | 4179.72021   | 22.64035     | 96.8685 |
| 2      | 78.275        | MM   | 2.9204      | 135.11977    | 7.71122e-1   | 3.1315  |

**2-((3*R*,4*S*)-5-(4-(3-(2-chloro-10*H*-phenothiazin-10-yl)propyl)piperazin-1-yl)-4-hydroxypent-1-en-3-yl)isoindoline-1,3-dione (3g)**

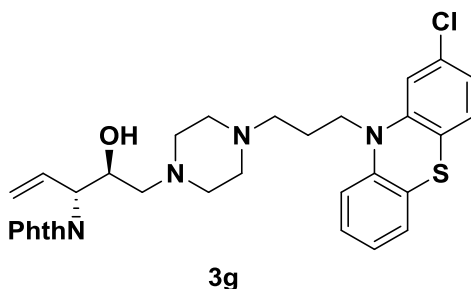

Alcohol **2g** (80.8 mg, 0.2 mmol) was subjected to standard reaction conditions with 7.5 mol% catalyst (100 °C, 48 h). Upon flash column chromatography (SiO<sub>2</sub>, 100% EtOAc), the title compound **3g** (68.3 mg, 0.116 mmol, >20:1 dr) was obtained as a pale yellow solid in 58% yield.

**TLC** (SiO<sub>2</sub>) R<sub>f</sub> = 0.3 (100% EtOAc)

**<sup>1</sup>H NMR** (500 MHz, CDCl<sub>3</sub>) δ: 7.84 (dd, *J* = 5.1, 3.1 Hz, 2H), 7.72 (dd, *J* = 5.2, 3.0 Hz, 2H), 7.12 (dd, *J* = 16.8, 8.0 Hz, 2H), 7.00 (d, *J* = 8.1 Hz, 1H), 6.91 (t, *J* = 7.5 Hz, 1H), 6.86 (d, *J* = 8.1 Hz, 2H), 6.81 (s, 1H), 6.42 – 6.30 (m, 1H), 5.35 – 5.24 (m, 2H), 4.74 (t, *J* = 7.3 Hz, 1H), 4.30 (dd, *J* = 13.4, 7.0 Hz, 1H), 3.86 (t, *J* = 6.7 Hz, 2H), 2.51 (s, 2H), 2.48 – 2.27 (m, 10H), 2.00 – 1.79 (m, 2H).

**<sup>13</sup>C NMR** (125 MHz, CDCl<sub>3</sub>) δ: 168.4, 146.6, 144.6, 134.3, 133.3, 132.5, 131.9, 128.0, 127.6, 127.5, 124.9, 123.6, 123.0, 122.4, 119.6, 115.9, 77.2, 66.4, 61.2, 57.9, 55.4, 53.2, 45.4, 24.1.

**HRMS** (H<sup>+</sup>, *m/z*) for C<sub>32</sub>H<sub>33</sub>ClN<sub>4</sub>O<sub>3</sub>S: calcd. = 589.2035; found = 589.2038.

**FTIR** (neat): 3452, 2940, 2815, 1769, 1708, 1566, 1458, 1382, 1127, 749.

**HPLC**: (Chiralcel column AD-H, Hexane:2-PrOH = 90:10, 1.0 mL/min, 230 nm) ee = 98%.

[α]<sub>D</sub><sup>24</sup> = +34.0° (c = 0.80, CHCl<sub>3</sub>).

**MP**: [63-66] °C

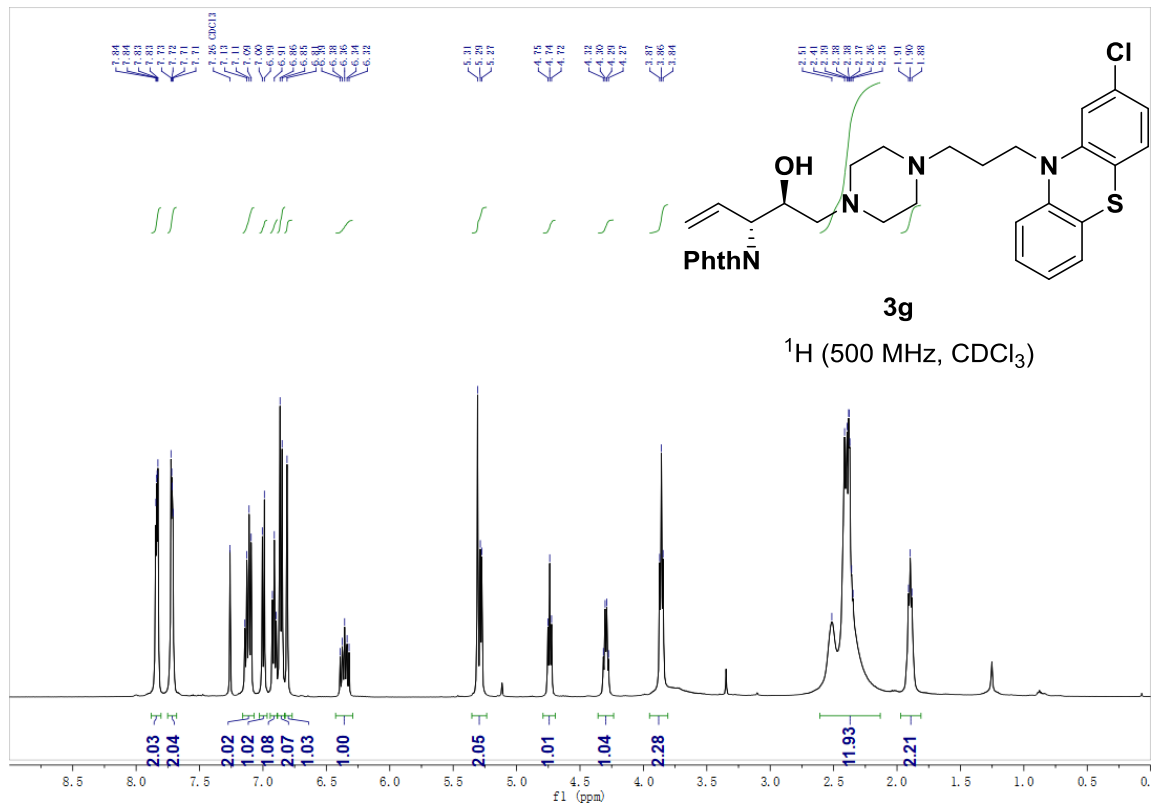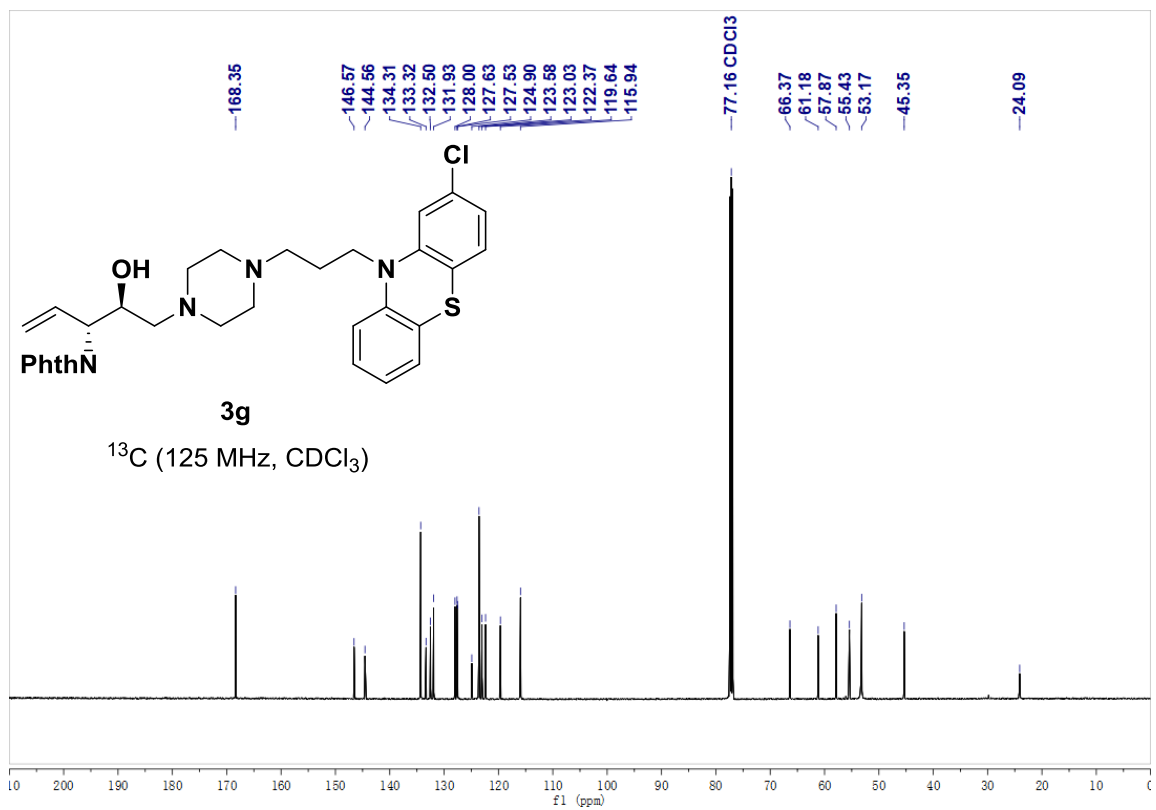



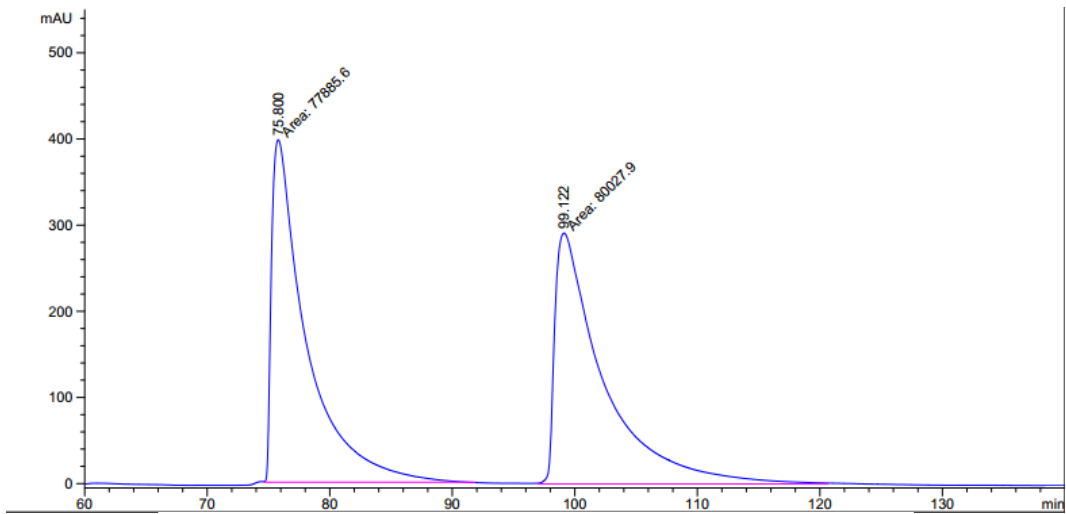

| Peak # | RetTime [min] | Type | Width [min] | Area [mAU*s] | Height [mAU] | Area %  |
|--------|---------------|------|-------------|--------------|--------------|---------|
| 1      | 75.800        | MM   | 3.2654      | 7.78856e4    | 397.53497    | 49.3217 |
| 2      | 99.122        | MM   | 4.5815      | 8.00279e4    | 291.12387    | 50.6783 |

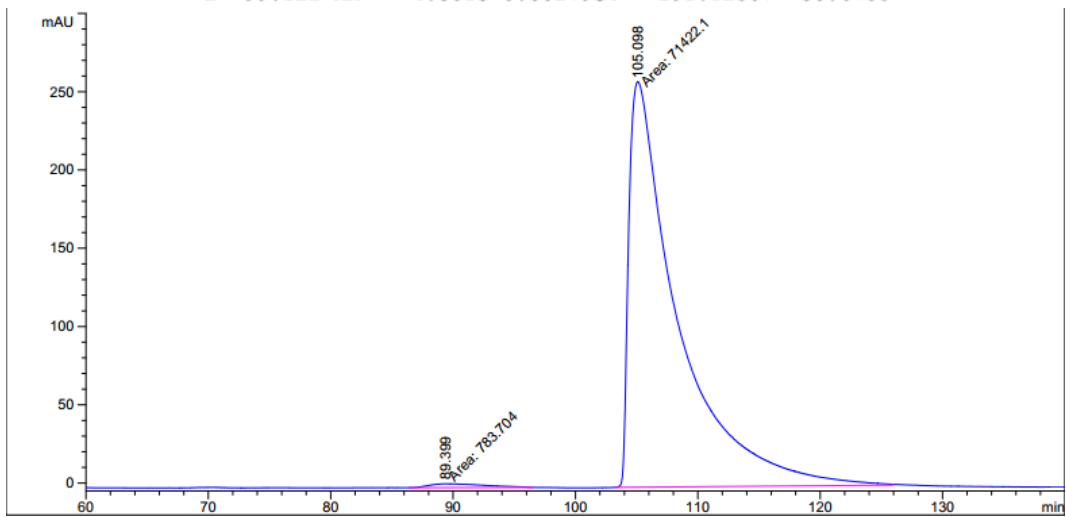

| Peak # | RetTime [min] | Type | Width [min] | Area [mAU*s] | Height [mAU] | Area %  |
|--------|---------------|------|-------------|--------------|--------------|---------|
| 1      | 89.399        | MM   | 5.2784      | 783.70435    | 2.47459      | 1.0854  |
| 2      | 105.098       | MM   | 4.5953      | 7.14221e4    | 259.04156    | 98.9146 |

**2-((3*R*,4*S*)-4-hydroxy-5-(2-phenyl-1*H*-benzo[*d*]imidazo[1,2-*a*]imidazol-1-yl)pent-1-en-3-yl)isoindoline-1,3-dione (3h)**

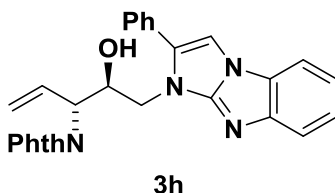

Alcohol **2h** (55.4 mg, 0.2 mmol) was subjected to standard reaction conditions with 7.5 mol% catalyst (100 °C, 48 h). Upon flash column chromatography (SiO<sub>2</sub>, 30:70 EtOAc:Toluene), the title compound **3h** (52.7 mg, 0.114 mmol, >20:1 dr) was obtained as a pale yellow solid in 57% yield.

**TLC** (SiO<sub>2</sub>) R<sub>f</sub> = 0.38 (30:70 EtOAc:Toluene)

**<sup>1</sup>H NMR** (500 MHz, CDCl<sub>3</sub>) δ: 7.75 – 7.70 (m, 4H), 7.66 (d, *J* = 8.1 Hz, 1H), 7.57 (d, *J* = 8.0 Hz, 1H), 7.31 (t, *J* = 7.7 Hz, 1H), 7.24 – 7.22 (m, 3H), 7.18 – 7.11 (m, 4H), 6.31 (ddd, *J* = 17.4, 10.3, 7.2 Hz, 1H), 5.23 (d, *J* = 10.3 Hz, 1H), 5.16 (d, *J* = 17.2 Hz, 1H), 4.84 – 4.81 (m, 1H), 4.72 (t, *J* = 7.7 Hz, 1H), 4.23 – 4.12 (m, 1H).

**<sup>13</sup>C NMR** (125 MHz, CDCl<sub>3</sub>) δ: 167.9, 134.2, 133.9, 133.2, 131.7, 129.4, 129.1, 128.8, 127.8, 127.3, 123.5, 123.4, 119.5, 119.2, 118.2, 110.3, 103.5, 70.9, 55.9, 48.6.

**HRMS** (Na<sup>+</sup>, *m/z*) for C<sub>28</sub>H<sub>22</sub>N<sub>4</sub>O<sub>3</sub>: calcd. = 485.1584; found = 485.1592.

**FTIR** (neat): 2922, 1708, 1635, 1558, 1380, 1239, 1066, 740, 718.

**HPLC**: (Chiralcel column OD-H, Hexane:2-PrOH = 90:10, 1.0 mL/min, 230 nm) ee = 98%.

$[\alpha]_D^{34} = +3.4^\circ$  (*c* = 1.18, CHCl<sub>3</sub>).

**MP** [63 – 65] °C

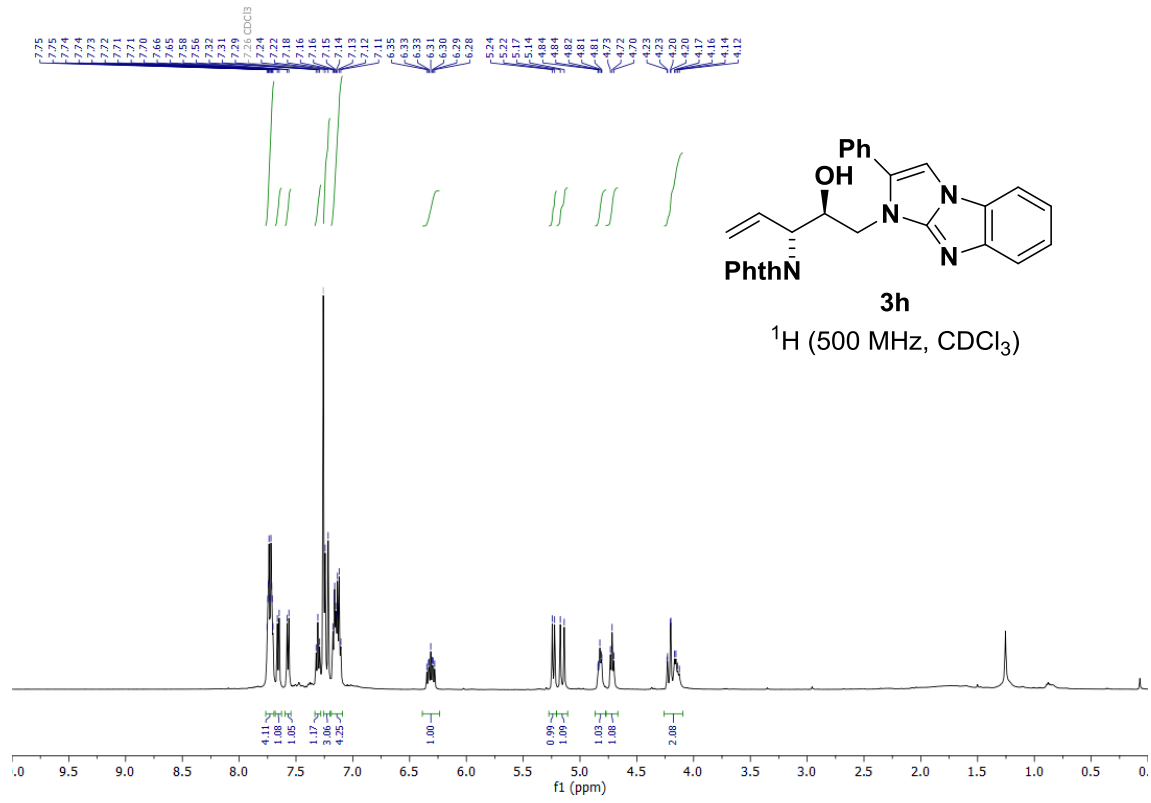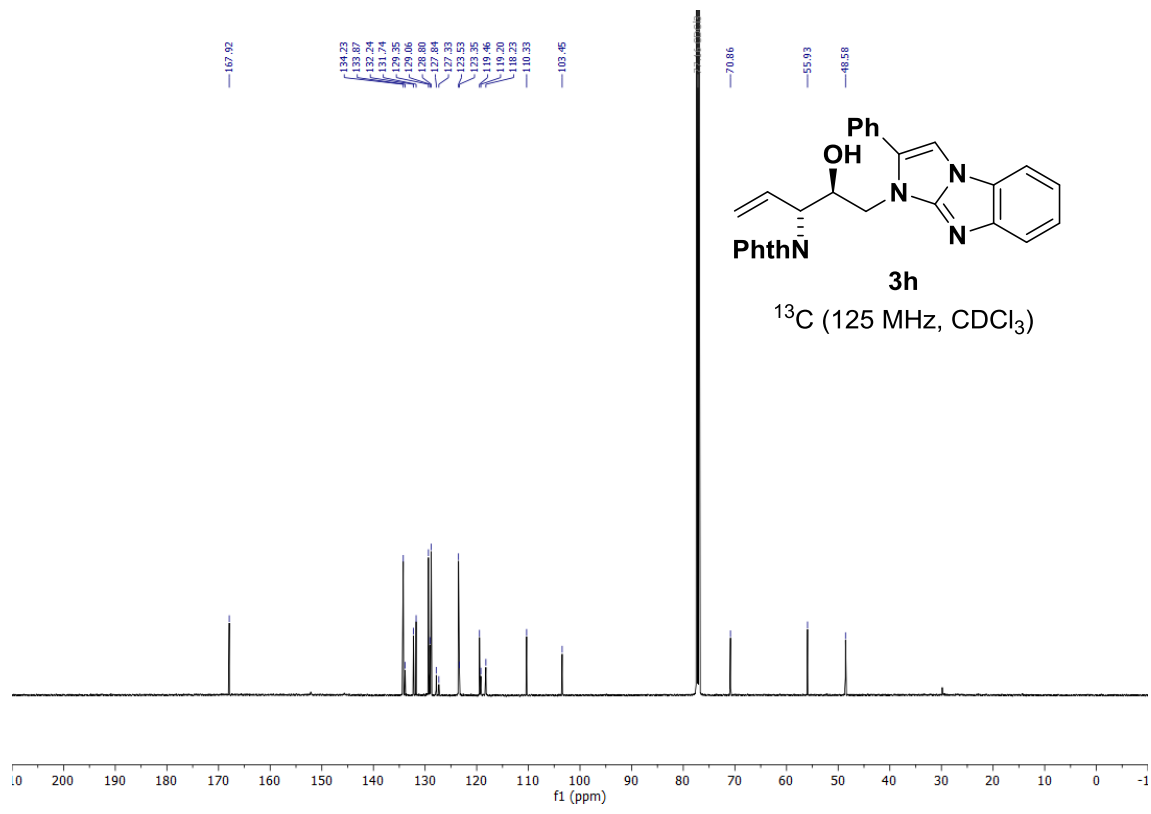

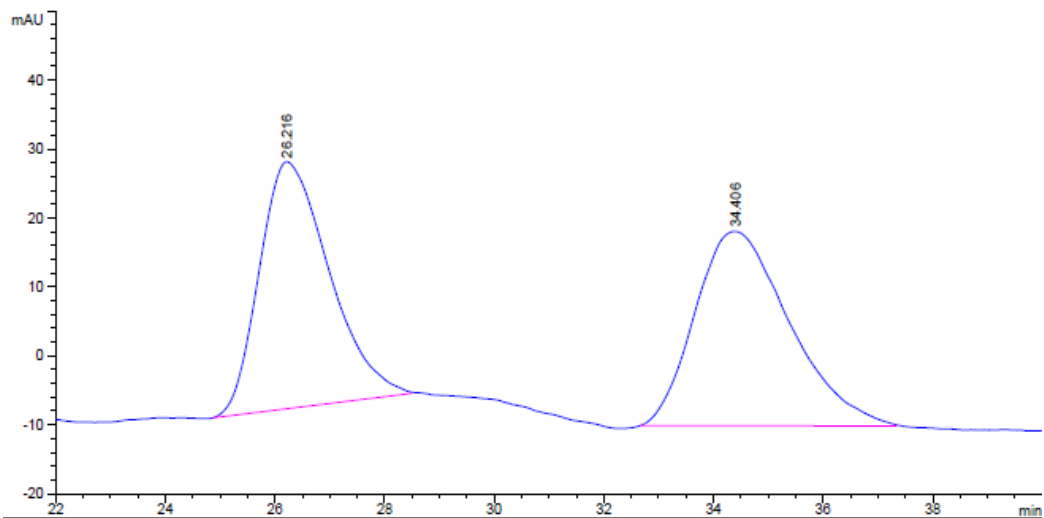

| Peak # | RetTime [min] | Type | Width [min] | Area [mAU*s] | Height [mAU] | Area %  |
|--------|---------------|------|-------------|--------------|--------------|---------|
| 1      | 26.216        | BB   | 1.1818      | 3170.46460   | 35.84736     | 48.4240 |
| 2      | 34.406        | BB   | 1.4265      | 3376.83398   | 28.21054     | 51.5760 |

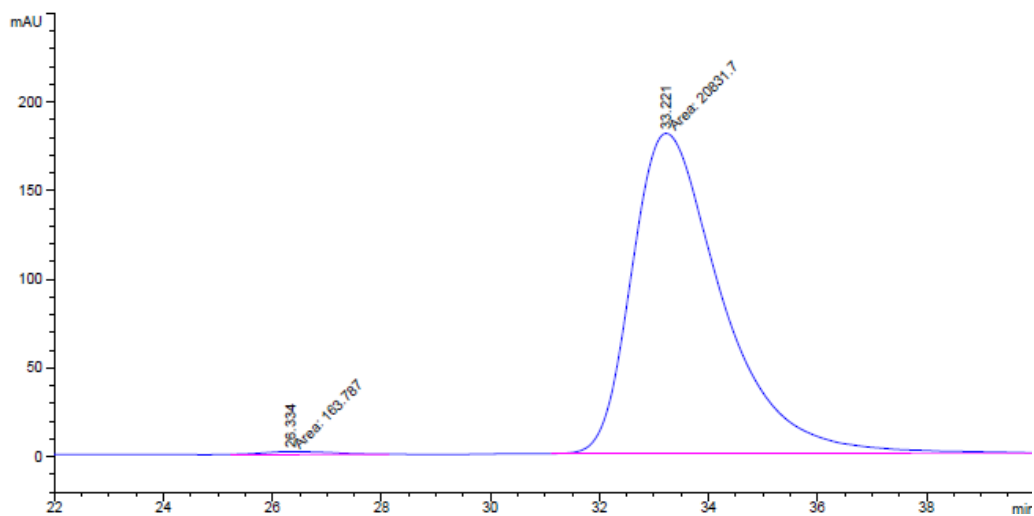

| Peak # | RetTime [min] | Type | Width [min] | Area [mAU*s] | Height [mAU] | Area %  |
|--------|---------------|------|-------------|--------------|--------------|---------|
| 1      | 26.334        | MM   | 1.5118      | 163.78746    | 1.80560      | 0.7801  |
| 2      | 33.221        | MM   | 1.9236      | 2.08317e4    | 180.48880    | 99.2199 |

**2-((3*R*,4*S*,*E*)-7-(benzyloxy)-4-hydroxyhepta-1,5-dien-3-yl)isoindoline-1,3-dione (**3i**)**

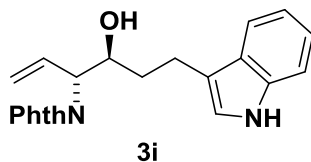

Alcohol **1i** (35.0 mg, 0.2 mmol) was subjected to standard reaction conditions (100 °C, 48 h) with 7.5 mol% Ir-**VI**. Upon flash column chromatography (SiO<sub>2</sub>, 30:80 EtOAc:hexanes), the title compound **3i** (53.9 mg, 0.15 mmol, >20:1 dr) was obtained as a yellow solid in 75% yield.

**TLC** (SiO<sub>2</sub>) R<sub>f</sub> = 0.28 (30:80 EtOAc:hexanes)

**<sup>1</sup>H NMR** (500 MHz, CDCl<sub>3</sub>) δ: 7.95 (s, 1H), 7.83 (dd, *J* = 5.4, 3.1 Hz, 2H), 7.72 (dd, *J* = 5.5, 3.0 Hz, 2H), 7.59 (d, *J* = 7.9 Hz, 1H), 7.32 (d, *J* = 8.1 Hz, 1H), 7.17 – 7.12 (m, 1H), 7.06 (dd, *J* = 11.0, 3.9 Hz, 1H), 7.00 (s, 1H), 6.30 (ddd, *J* = 17.9, 10.3, 7.7 Hz, 1H), 5.34 – 5.23 (m, 2H), 4.75 (dd, *J* = 7.7, 3.8 Hz, 1H), 4.17 – 4.12 (m, 1H), 3.01 (td, *J* = 8.8, 4.3 Hz, 1H), 2.95 – 2.86 (m, 1H), 2.06 – 1.90 (m, 2H).

**<sup>13</sup>C NMR** (125 MHz, CDCl<sub>3</sub>) δ: 168.8, 136.5, 134.4, 131.8, 131.3, 127.5, 123.7, 122.0, 121.6, 120.1, 119.3, 119.1, 115.9, 111.2, 77.2, 71.8, 59.6, 34.7, 21.4.

**HRMS** (Na<sup>+</sup>, *m/z*) for C<sub>22</sub>H<sub>20</sub>N<sub>2</sub>O<sub>3</sub>: calcd. = 383.1366; found = 383.1376.

**FTIR** (neat): 3335, 1708, 1639, 1274, 1263, 764, 734, 703.

**HPLC**: (Chiralcel column ADH, Hexane:2-PrOH = 90:10, 1.0 mL/min, 230 nm) ee = 96%.

[α]<sub>D</sub><sup>24</sup> = 68.0° (c = 0.37, CHCl<sub>3</sub>).

**MP** : 80-85 °C

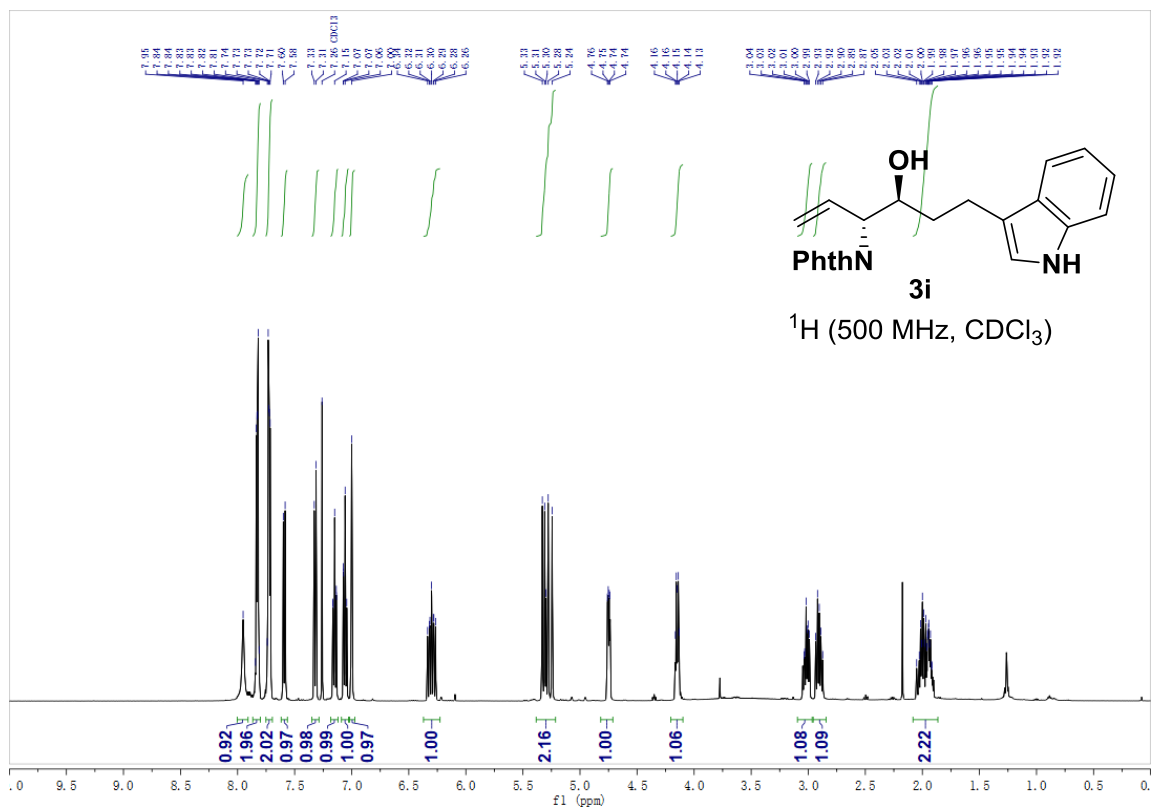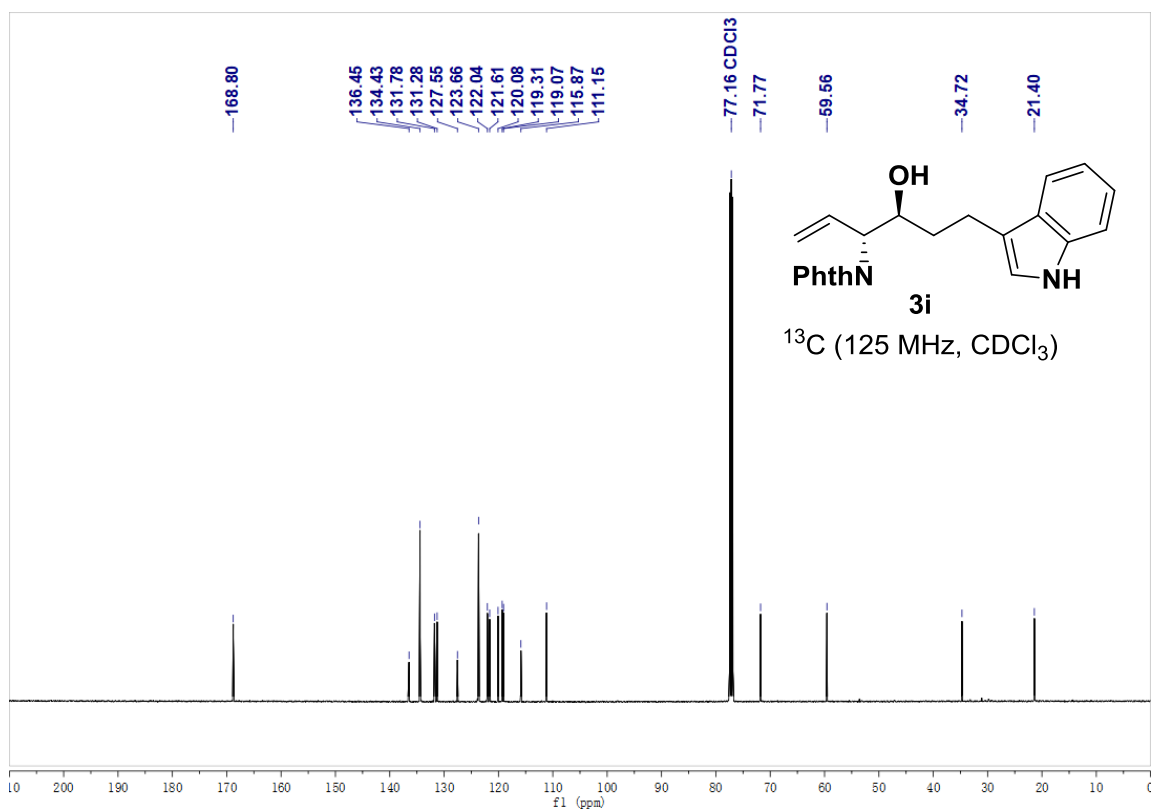

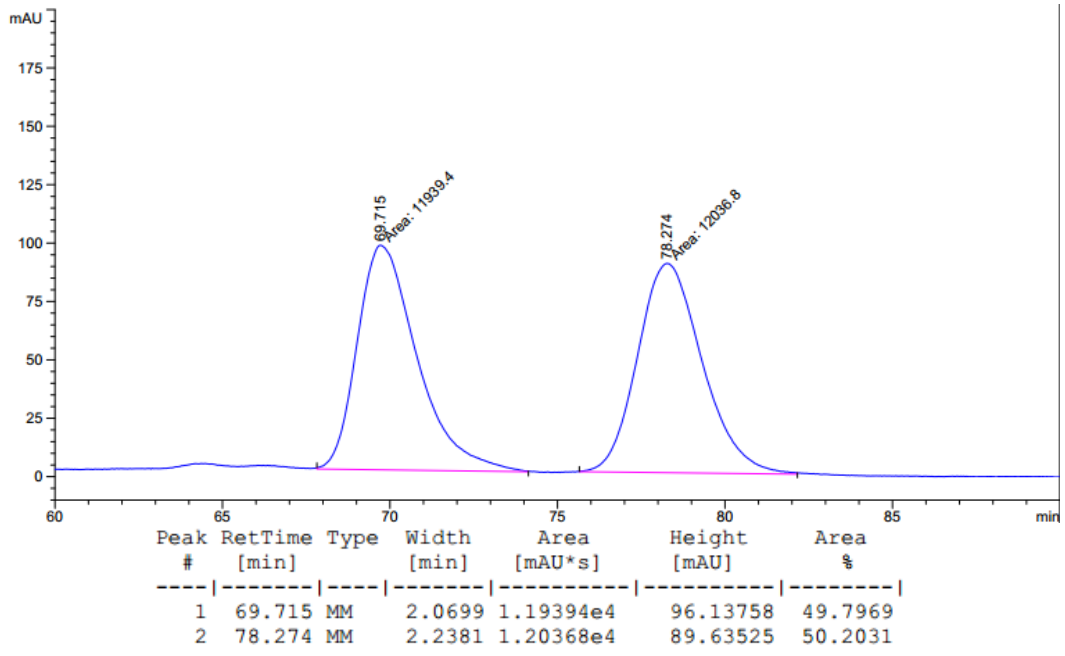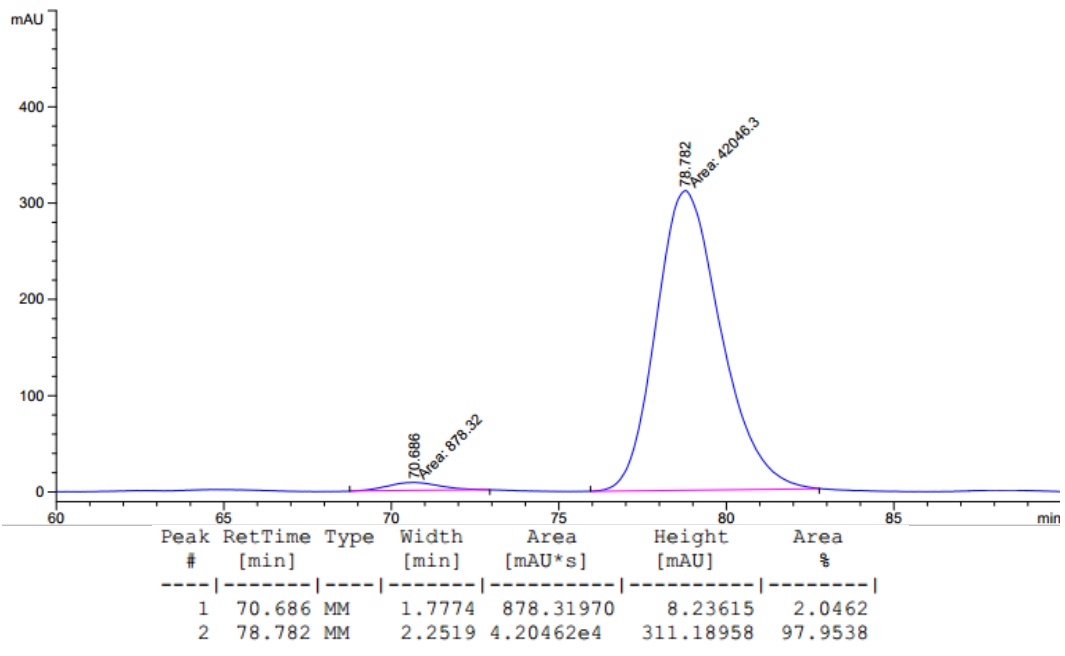

***tert*-butyl ((2*S*,3*R*)-3-(1,3-dioxoisindolin-2-yl)-2-hydroxypent-4-en-1-yl)carbamate (**3j**)**

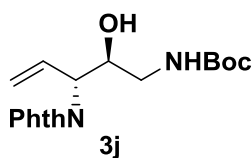

Alcohol **2j** (32.2 mg, 0.2 mmol) was subjected to standard reaction conditions (100 °C, 48 h). Upon flash column chromatography (SiO<sub>2</sub>, 30:70 EtOAc:hexanes), the title compound **3j** (45.1 mg, 0.13 mmol, >20:1 dr) was obtained as a pale yellow oil in 66% yield.

**TLC (SiO<sub>2</sub>)** R<sub>f</sub> = 0.32 (30:70 EtOAc:hexanes)

**<sup>1</sup>H NMR** (500 MHz, CDCl<sub>3</sub>) δ: 7.85 (dd, *J* = 5.4, 3.1 Hz, 2H), 7.74 (dd, *J* = 5.5, 3.0 Hz, 2H), 6.27 (ddd, *J* = 17.1, 10.3, 7.9 Hz, 1H), 5.33 (d, *J* = 10.7 Hz, 1H), 5.31 (d, *J* = 17.1 Hz, 1H), 4.97 (brs, 1H), 4.76 – 4.74 (m, 1H), 4.25 (brs, 1H), 3.86 (brs, 1H), 3.46 – 3.40 (m, 1H), 3.15 – 3.10 (m, 1H), 1.43 (brs, 9H).

**<sup>13</sup>C NMR** (125 MHz, CDCl<sub>3</sub>) δ: 168.5 (2C), 156.7, 134.5 (2C), 131.8 (2C), 131.4, 123.7 (2C), 120.4, 79.9, 71.3, 56.8, 43.6, 28.5 (3C).

**HRMS** (Na<sup>+</sup>, *m/z*) for C<sub>18</sub>H<sub>22</sub>N<sub>2</sub>O<sub>5</sub>: calcd. = 369.1421; found = 369.1427.

**FTIR** (neat): 3372, 2978, 1704, 1513, 1381, 1165, 1060

**HPLC**: (Chiralcel column AD-H, Hexane:2-PrOH = 95:5, 1.0 mL/min, 230 nm) ee = 97%.

[α]<sub>D</sub><sup>34</sup> = +30.6° (c = 0.98, CHCl<sub>3</sub>).



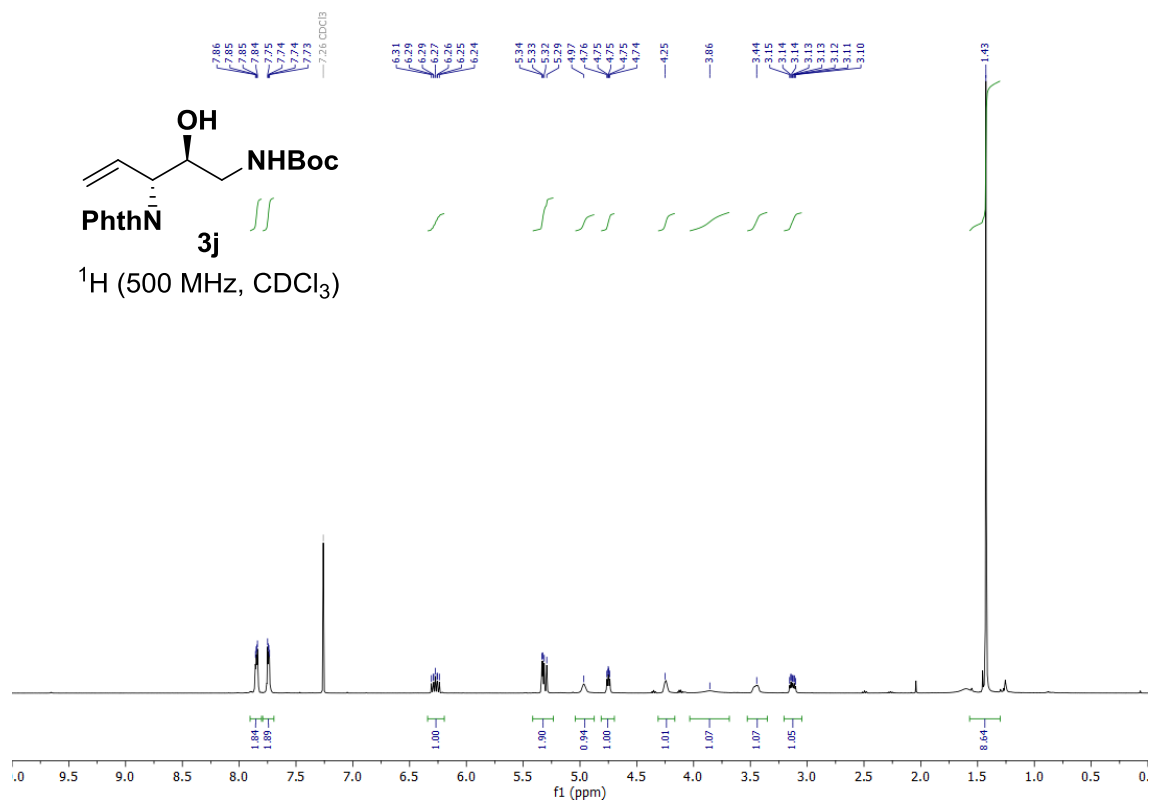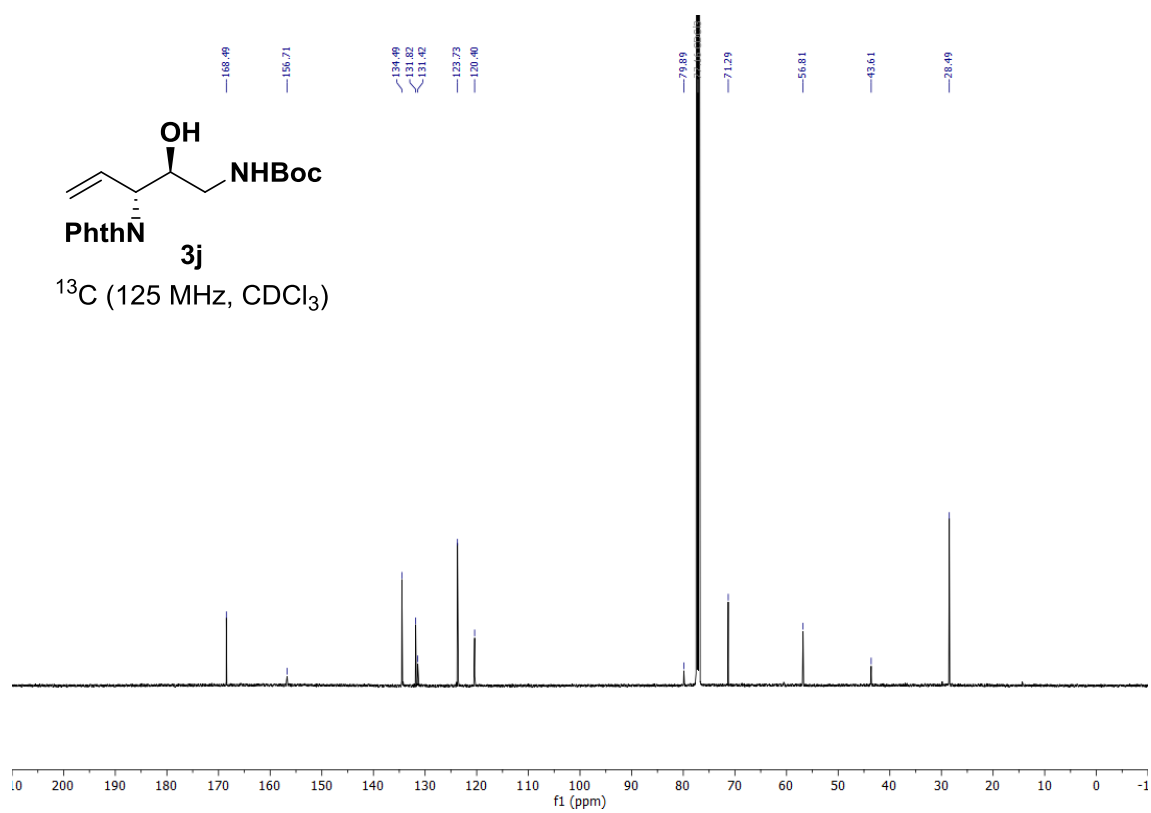

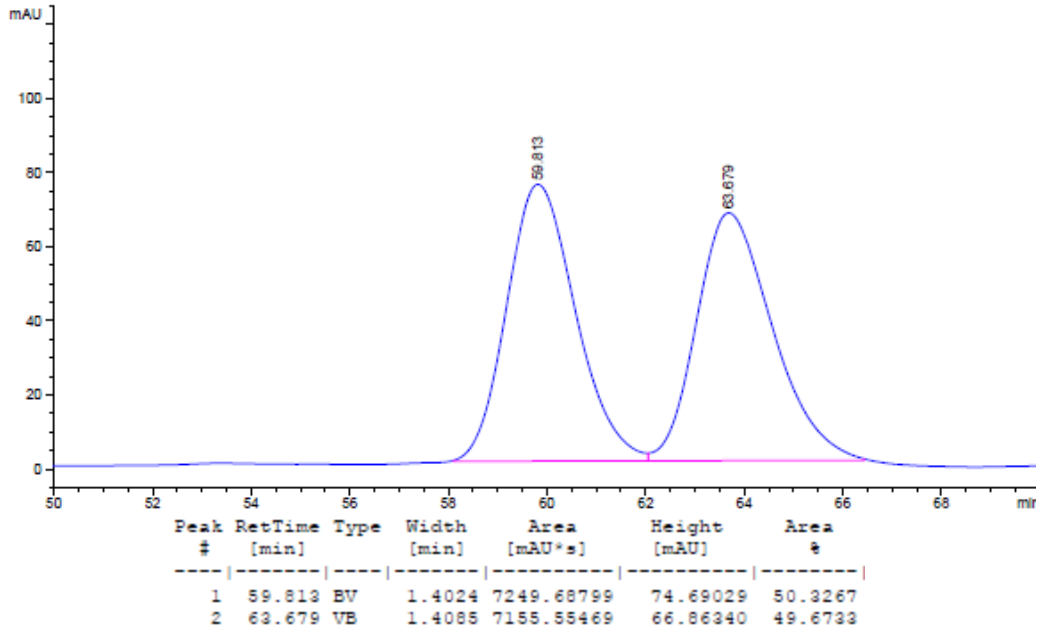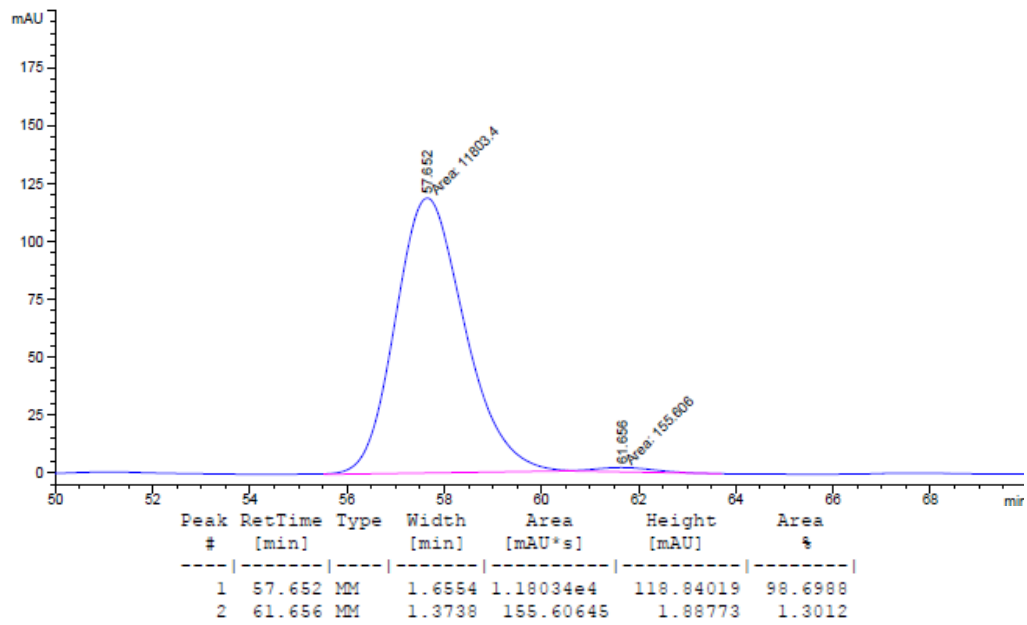

**tert-butyl ((3*S*,4*R*)-4-(1,3-dioxoisindolin-2-yl)-3-hydroxyhex-5-en-1-yl)carbamate (**3k**)**

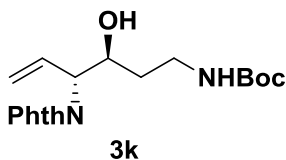

Alcohol **2k** (35.0 mg, 0.2 mmol) was subjected to standard reaction conditions (100 °C, 48 h). Upon flash column chromatography (SiO<sub>2</sub>, 40:60 EtOAc:hexanes), the title compound **3k** (43.2 mg, 0.12 mmol, >20:1 dr) was obtained as a pale yellow oil in 60% yield.

**TLC** (SiO<sub>2</sub>) R<sub>f</sub> = 0.29 (50:50 EtOAc:hexanes)

**<sup>1</sup>H NMR** (500 MHz, CDCl<sub>3</sub>) δ: 7.84 (d, *J* = 3.2 Hz, 2H), 7.77 – 7.69 (m, 2H), 6.35 – 6.22 (m, 1H), 5.28 (dd, *J* = 19.2, 13.9 Hz, 2H), 4.97 (s, 1H), 4.70 – 4.63 (m, 1H), 4.22 – 4.16 (m, 2H), 3.42 (s, 1H), 3.17 (dd, *J* = 13.0, 5.1 Hz, 1H), 1.73 – 1.56 (m, 2H), 1.41 (s, 9H).

**<sup>13</sup>C NMR** (125 MHz, CDCl<sub>3</sub>) δ: 168.6, 156.7, 134.4, 131.8, 123.7, 120.0, 79.5, 70.0, 59.4, 37.6, 34.4, 28.5.

**HRMS** (H<sup>+</sup>, *m/z*) for C<sub>19</sub>H<sub>24</sub>N<sub>2</sub>O<sub>5</sub>: calcd. = 361.1758; found = 361.1756.

**FTIR** (neat): 3363, 2360, 2340, 1635, 1274, 1263, 763, 748.

**HPLC**: (Chiralcel column OD-H, Hexane:2-PrOH = 95:5, 1.0 mL/min, 230 nm) ee = 94%.

$[\alpha]_D^{34} = +44.9^\circ$  (*c* = 0.67, CHCl<sub>3</sub>).

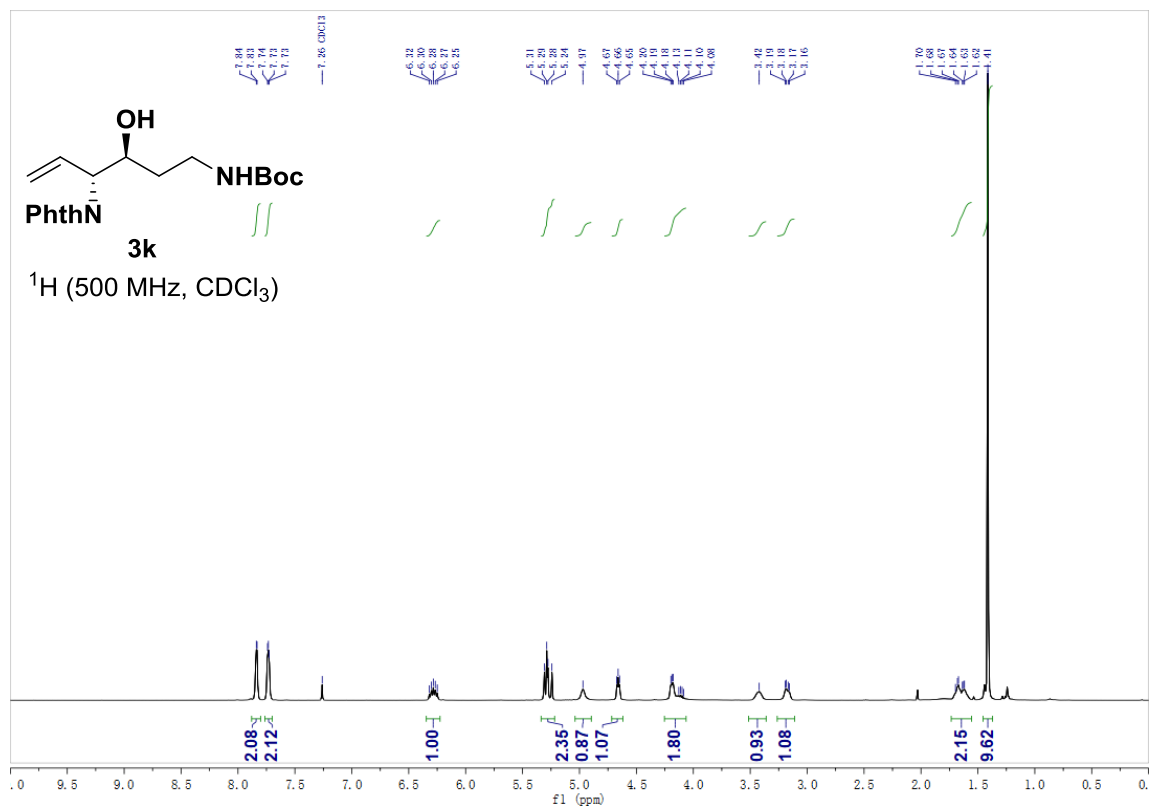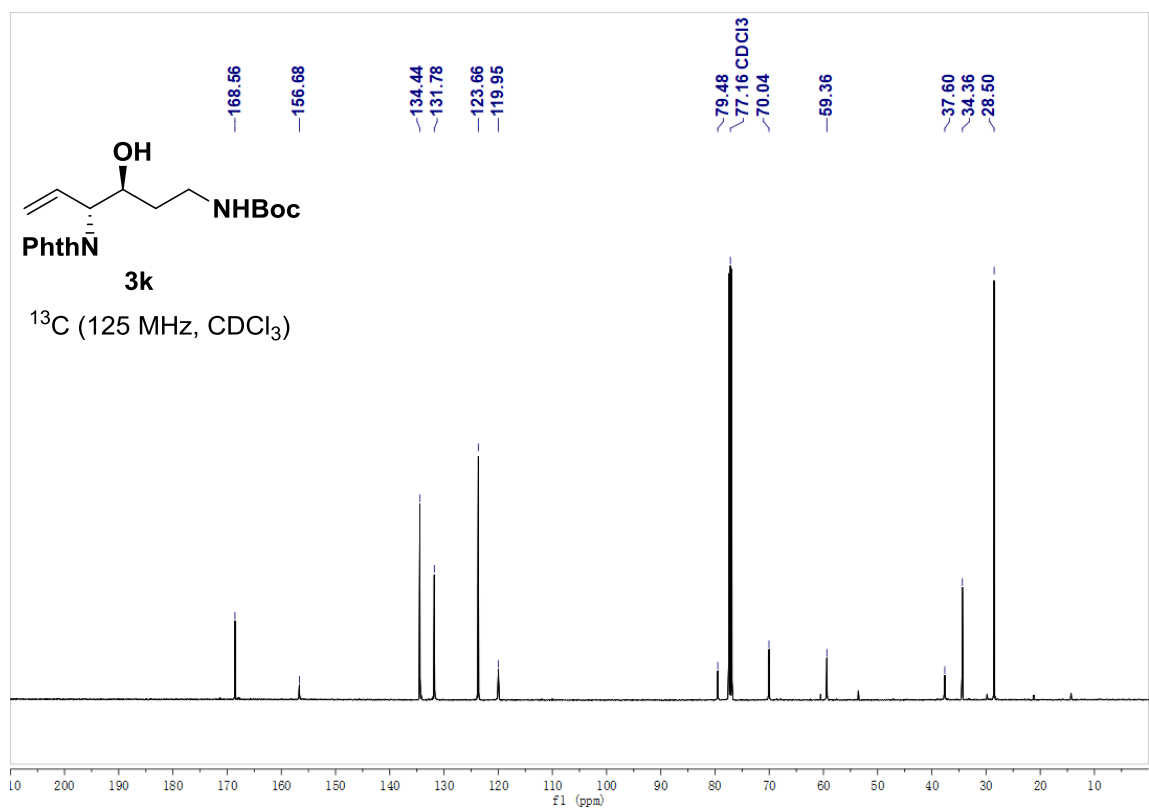

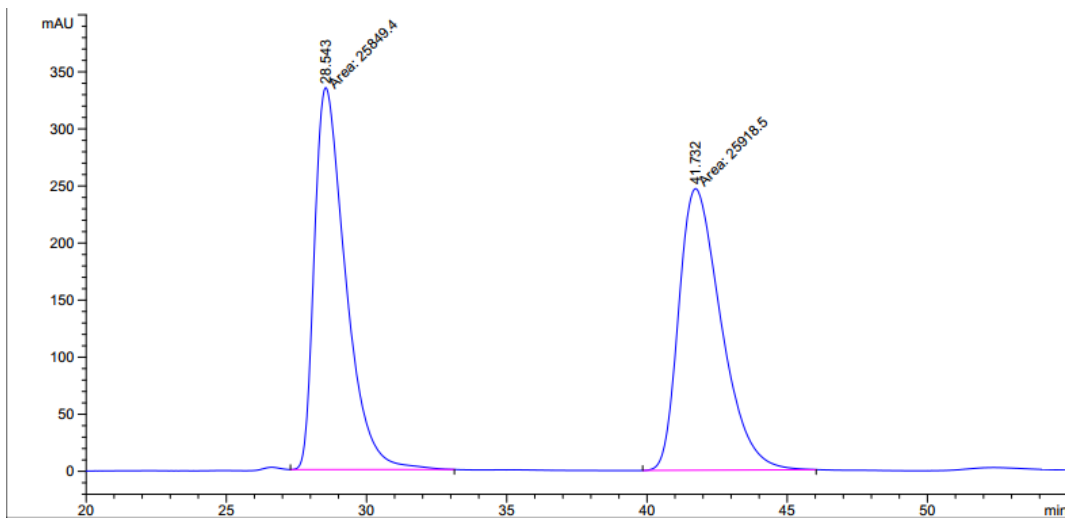

| Peak # | RetTime [min] | Type | Width [min] | Area [mAU*s] | Height [mAU] | Area %  |
|--------|---------------|------|-------------|--------------|--------------|---------|
| 1      | 28.543        | MM   | 1.2876      | 2.58494e4    | 334.60706    | 49.9333 |
| 2      | 41.732        | MM   | 1.7510      | 2.59185e4    | 246.69958    | 50.0667 |

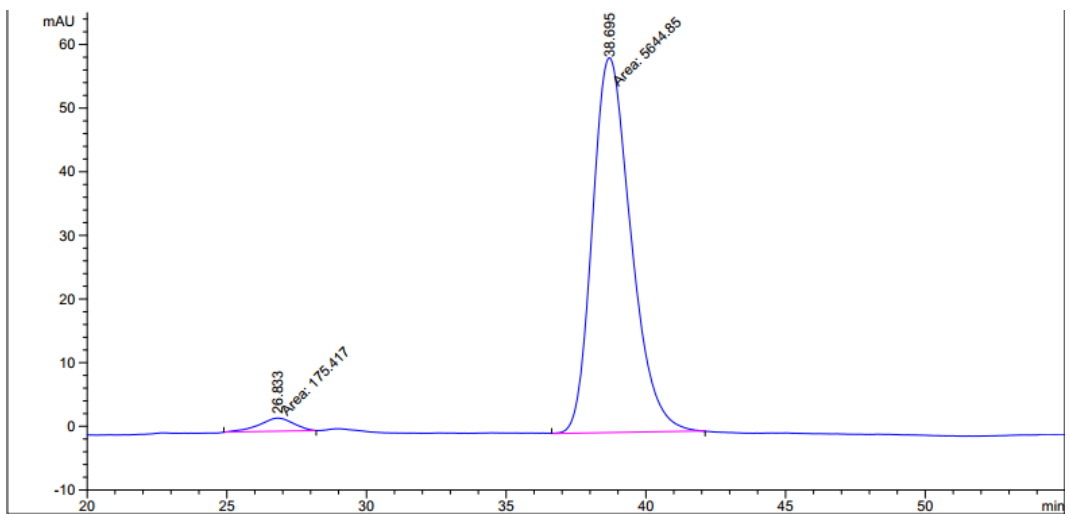

| Peak # | RetTime [min] | Type | Width [min] | Area [mAU*s] | Height [mAU] | Area %  |
|--------|---------------|------|-------------|--------------|--------------|---------|
| 1      | 26.833        | MM   | 1.4119      | 175.41704    | 2.07075      | 3.0139  |
| 2      | 38.695        | MM   | 1.5974      | 5644.85156   | 58.89788     | 96.9861 |

**2-((3*R*,4*S*)-4-hydroxy-6-((4-methoxybenzyl)oxy)hex-1-en-3-yl)isoindoline-1,3-dione (**3I**)**

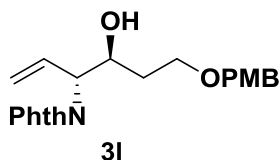

Alcohol Oxidation level: Alcohol **2I** (39.2 mg, 0.2 mmol) was subjected to standard reaction conditions (100 °C, 48 h). Upon flash column chromatography (SiO<sub>2</sub>, 30:70 EtOAc:hexanes), the title compound **3I** (54.2 mg, 0.142 mmol, >20:1 dr) was obtained as a colorless oil in 71% yield.

Aldehyde Oxidation level: dehydro-**2I** (38.8 mg, 0.2 mmol) was subjected to standard reaction conditions (100 °C, 48 h) with 7.5% catalyst of Ir-**VI** and 300 mol% 2-PrOH (36.0 mg). Upon flash column chromatography (SiO<sub>2</sub>, 30:70 EtOAc:hexanes), the title compound **3I** (47.3 mg, 0.124 mmol, >20:1 dr) was obtained as a colorless oil in 62% yield.

**TLC (SiO<sub>2</sub>)** R<sub>f</sub> = 0.28 (30:70 EtOAc:hexanes)

**<sup>1</sup>H NMR** (500 MHz, CDCl<sub>3</sub>) δ: 7.84 (dd, *J* = 5.4, 3.1 Hz, 2H), 7.73 (dd, *J* = 5.4, 3.0 Hz, 2H), 7.23 (d, *J* = 8.5 Hz, 2H), 6.85 (d, *J* = 8.6 Hz, 2H), 6.38 – 6.28 (m, 1H), 5.32 – 5.23 (m, 2H), 4.72 (dd, *J* = 7.0, 6.2 Hz, 1H), 4.46 – 4.39 (m, 2H), 4.35 (dd, *J* = 12.1, 5.8 Hz, 1H), 3.92 (s, 1H), 3.78 (s, 3H), 3.71 – 3.65 (m, 1H), 3.64 – 3.58 (m, 1H), 1.85 – 1.77 (m, 2H).

**<sup>13</sup>C NMR** (125 MHz, CDCl<sub>3</sub>) δ: 168.5, 159.3, 134.4, 131.9, 130.2, 129.5, 123.6, 123.6, 119.8, 113.9, 77.2, 73.1, 70.6, 67.8, 59.2, 55.4, 33.8.

**HRMS** (Na<sup>+</sup>, *m/z*) for C<sub>22</sub>H<sub>23</sub>NO<sub>5</sub>: calcd. = 404.1468; found = 404.1476.

**FTIR** (neat): 3404, 1770, 1709, 1513, 1382, 1265, 1085, 733, 703.

**HPLC**: (Chiralcel column AD-H, Hexane:2-PrOH = 96:4, 1.0 mL/min, 230 nm) ee = 96%.

**[α]<sub>D</sub><sup>34</sup>** = +32.5° (c = 0.83, CHCl<sub>3</sub>).

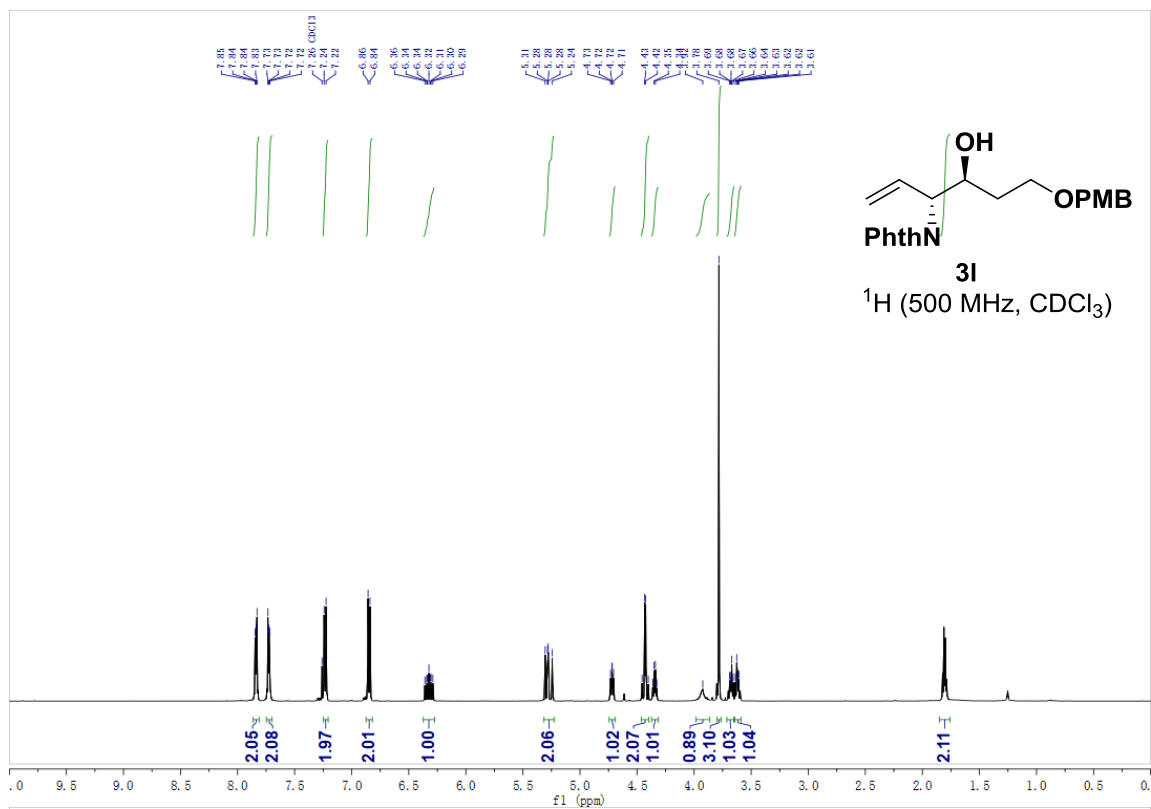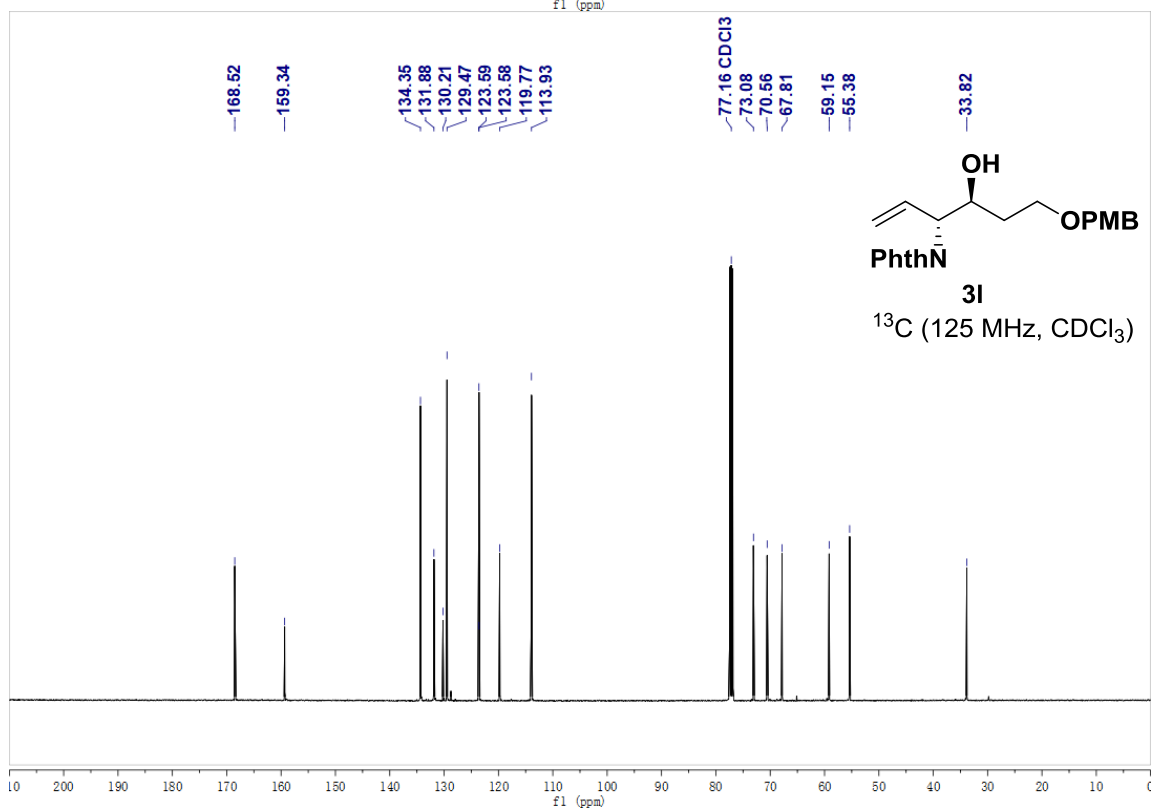

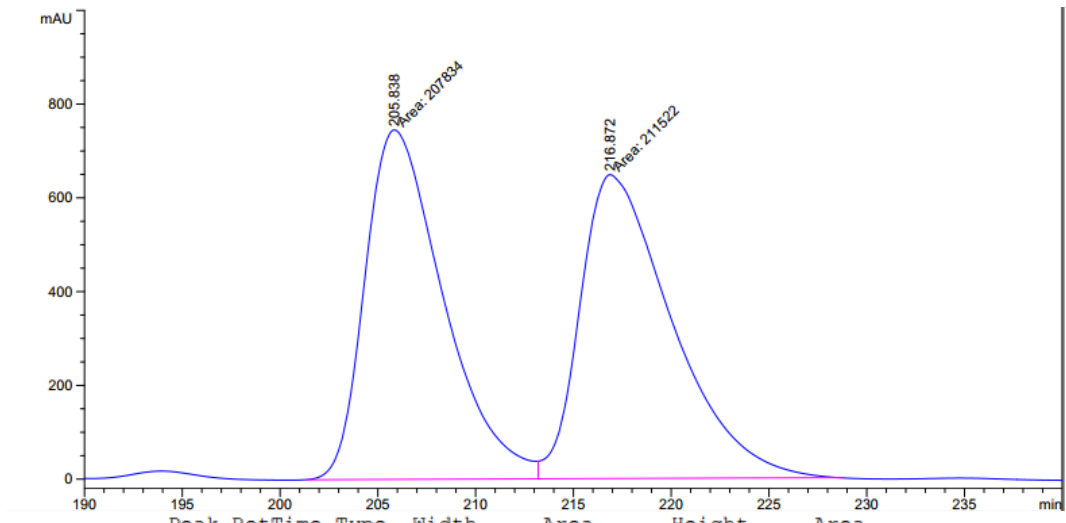

| Peak # | RetTime [min] | Type | Width [min] | Area [mAU*s] | Height [mAU] | Area %  |
|--------|---------------|------|-------------|--------------|--------------|---------|
| 1      | 205.838       | MF   | 4.6470      | 2.07834e5    | 745.40668    | 49.5603 |
| 2      | 216.872       | FM   | 5.4390      | 2.11522e5    | 648.16034    | 50.4397 |

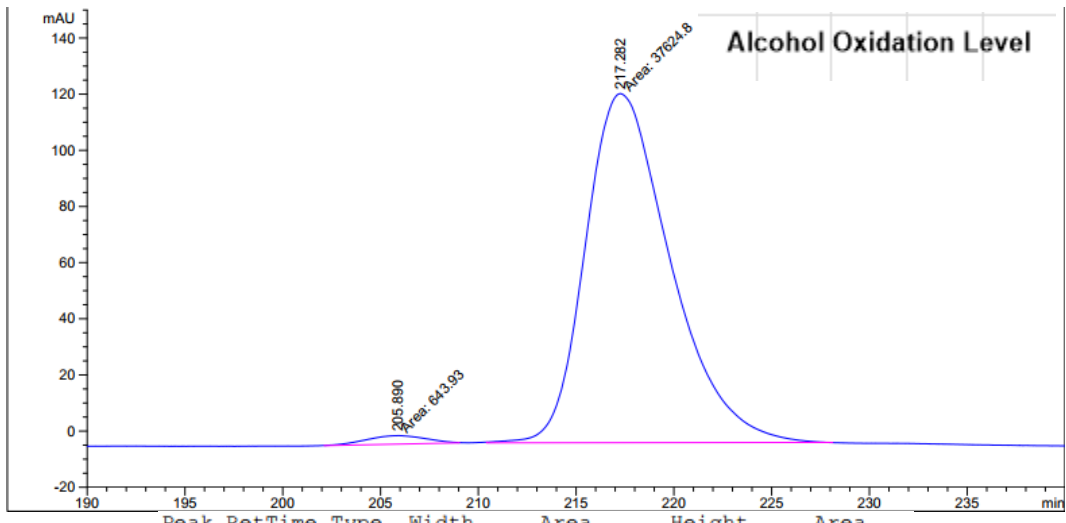

| Peak # | RetTime [min] | Type | Width [min] | Area [mAU*s] | Height [mAU] | Area %  |
|--------|---------------|------|-------------|--------------|--------------|---------|
| 1      | 205.890       | MM   | 3.5313      | 643.92981    | 3.03916      | 1.6827  |
| 2      | 217.282       | MM   | 5.0435      | 3.76248e4    | 124.33395    | 98.3173 |



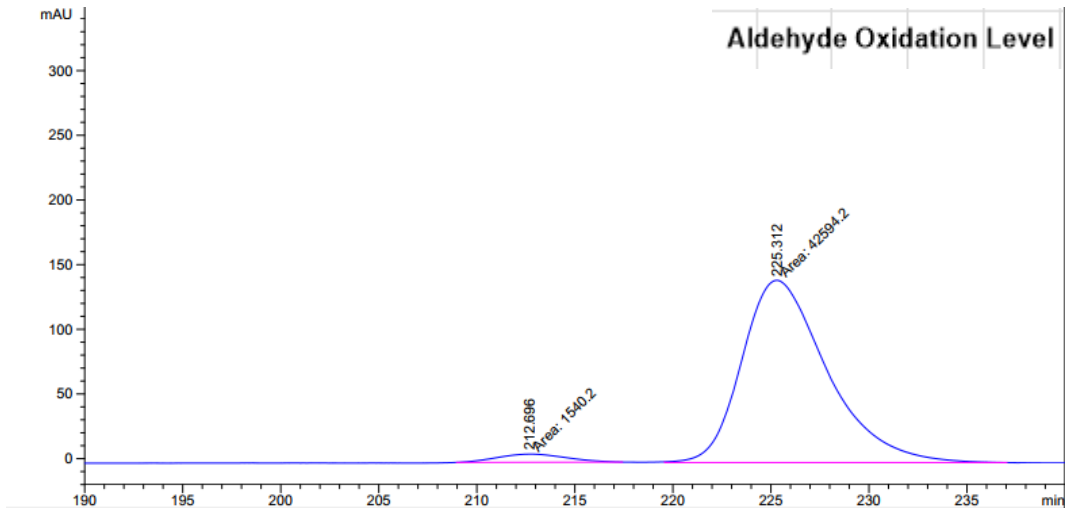

**2-((3*R*,4*S*)-7,7,7-trifluoro-4-hydroxyhept-1-en-3-yl)isoindoline-1,3-dione (**3m**)**

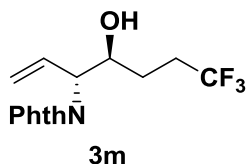

Alcohol **2m** (25.6 mg, 0.2 mmol) was subjected to standard reaction conditions with 7.5% mol of (R)-**Ir-VI** (100 °C, 48 h). Upon flash column chromatography (SiO<sub>2</sub>, 15:85 EtOAc:hexanes), the title compound **3m** (47.0 mg, 0.15 mmol, >20:1 dr) was obtained as a white solid in 75% yield.

**TLC** (SiO<sub>2</sub>) R<sub>f</sub> = 0.28 (15:85 EtOAc:hexanes)

**<sup>1</sup>H NMR** (500 MHz, CDCl<sub>3</sub>) δ: 7.86 (dd, *J* = 5.4, 3.1 Hz, 2H), 7.76 (dd, *J* = 5.4, 3.0 Hz, 2H), 6.32 – 6.18 (m, 1H), 5.46 – 5.26 (m, 2H), 4.67 (dd, *J* = 8.0, 3.8 Hz, 1H), 4.21 – 4.00 (m, 1H), 3.80 (s, 1H), 2.57 – 2.33 (m, 1H), 2.27 – 2.10 (m, 1H), 1.83 – 1.72 (m, 2H).

**<sup>13</sup>C NMR** (125 MHz, CDCl<sub>3</sub>) δ: 168.7, 134.6, 131.7, 130.6, 123.8, 121.1, 77.2, 70.8, 59.6, 30.34 (q, *J* = 29.0 Hz), 26.8, 26.8.

**<sup>19</sup>F NMR** (470 MHz, CDCl<sub>3</sub>) δ: -66.4 (t, *J* = 10.9 Hz).

**HRMS** (H<sup>+</sup>, *m/z*) for C<sub>15</sub>H<sub>14</sub>F<sub>3</sub>NO<sub>3</sub>: calcd. = 314.0999; found = 314.1001.

**FTIR** (neat): 3346, 2360, 2341, 1704, 1382, 1275, 1137, 749.

**HPLC**: (Chiralcel column AD-H, Hexane:2-PrOH = 97:3, 1.0 mL/min, 230 nm) ee = 94%.

$[\alpha]_D^{24} = +40.5^\circ$  (*c* = 0.74, CHCl<sub>3</sub>).

**MP** [60 – 64] °C

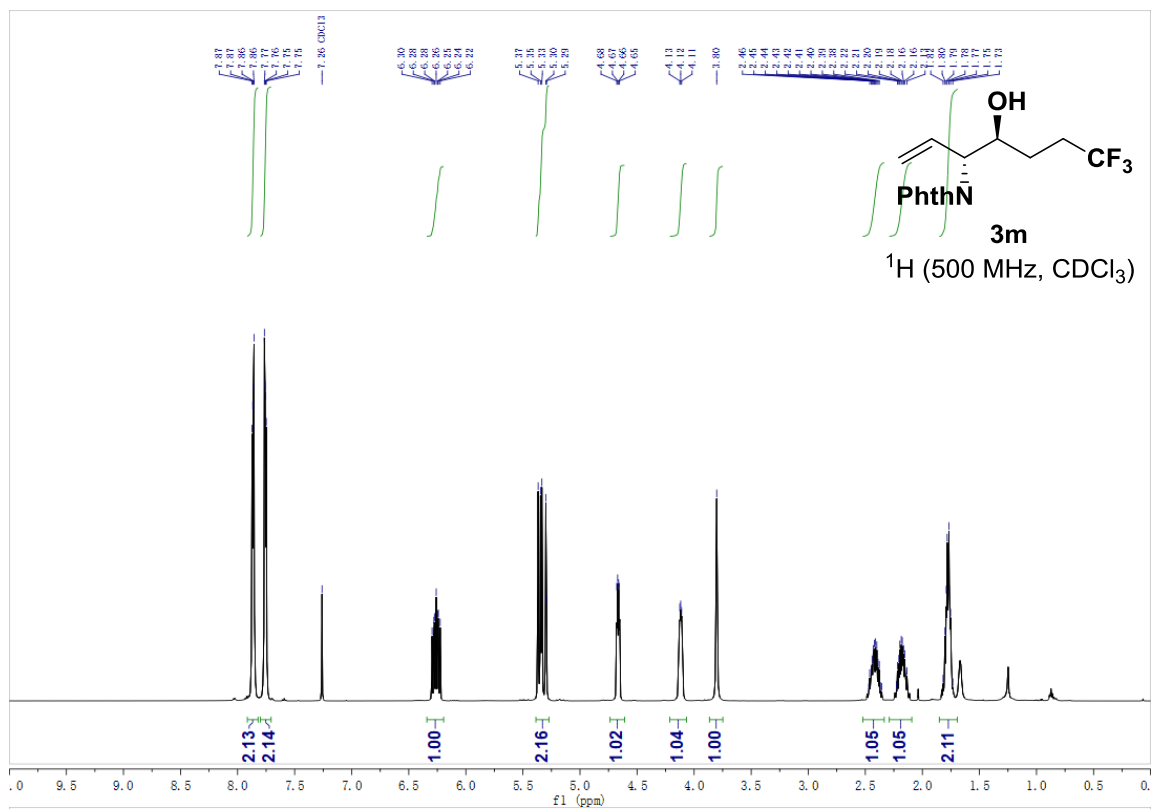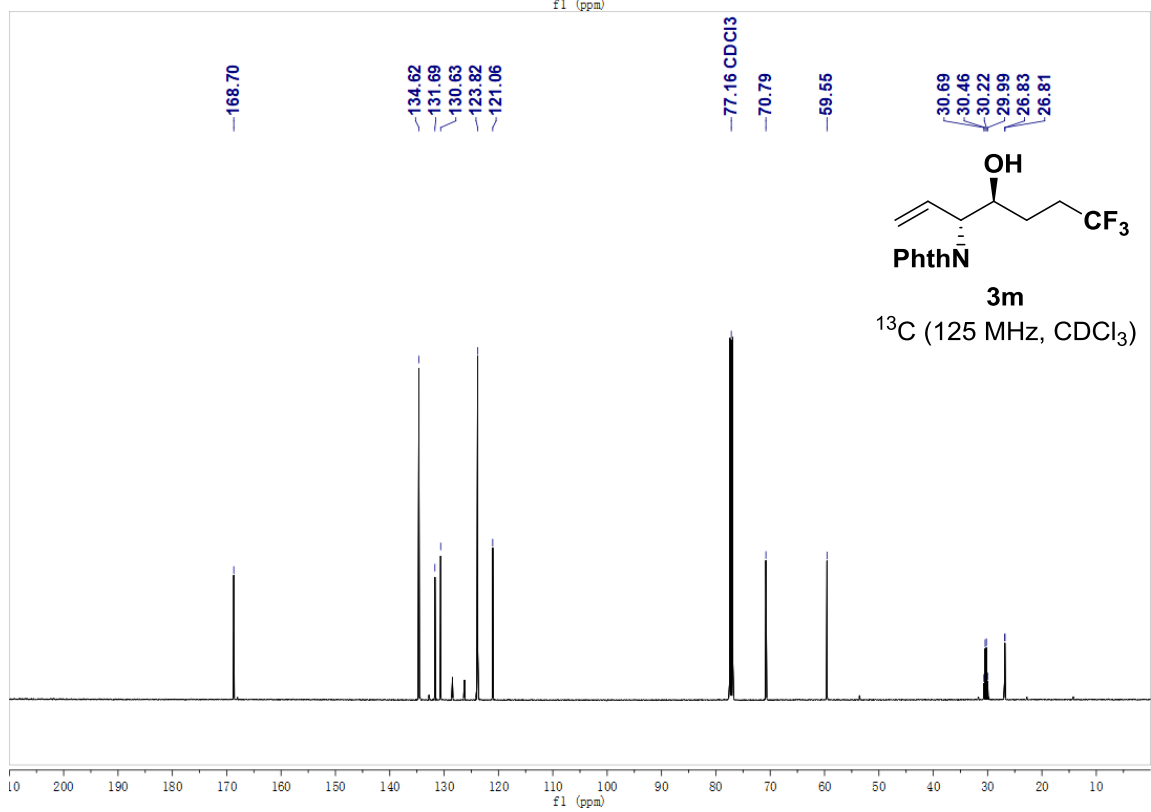

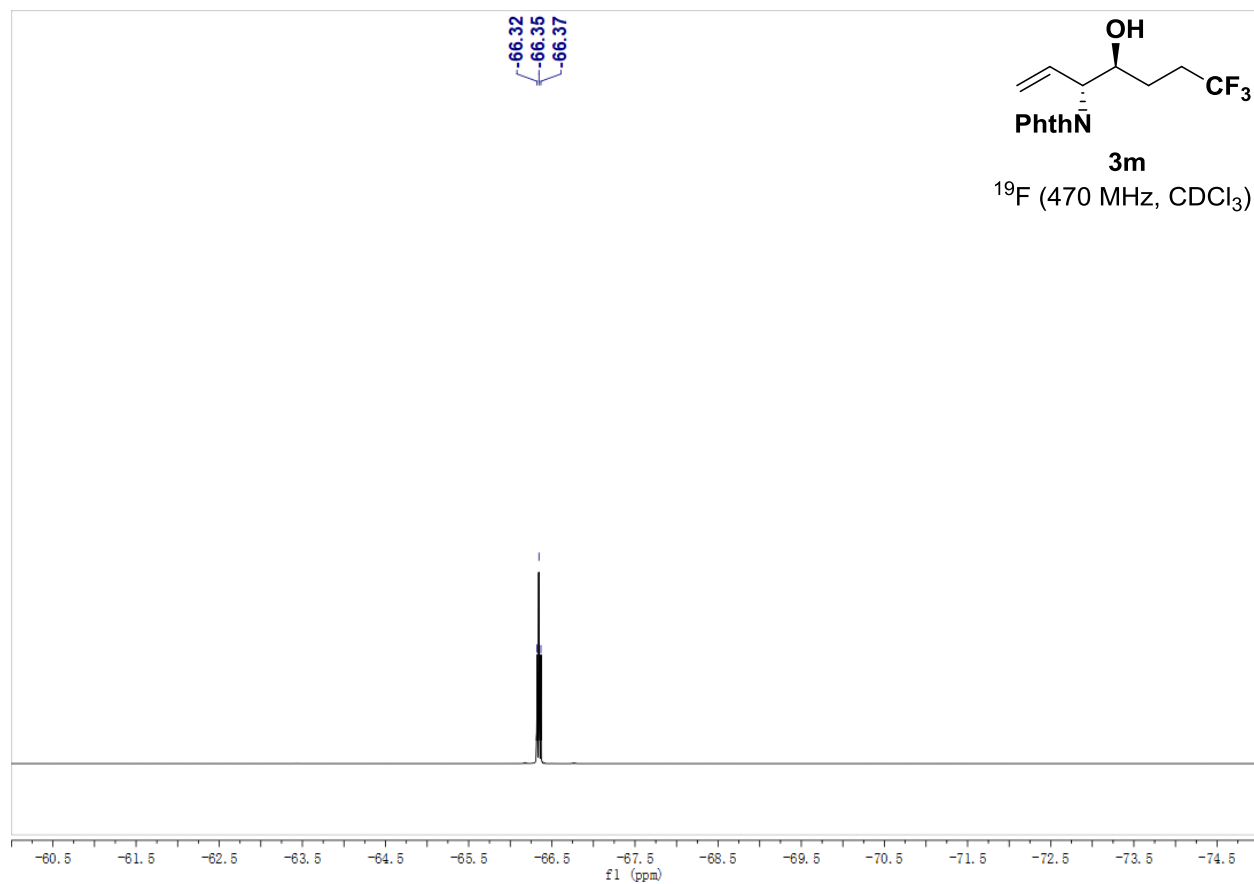

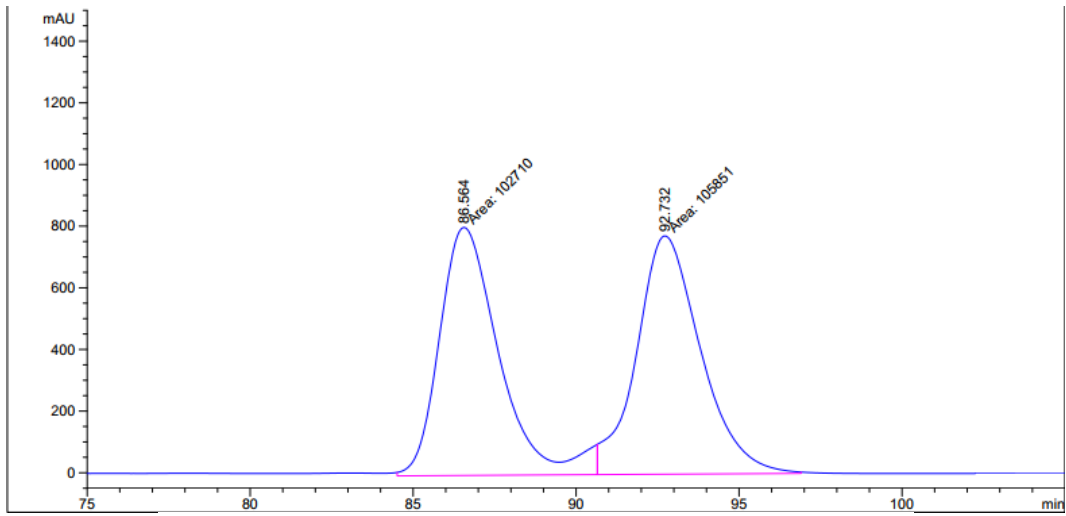

| Peak # | RetTime [min] | Type | Width [min] | Area [mAU*s] | Height [mAU] | Area %  |
|--------|---------------|------|-------------|--------------|--------------|---------|
| 1      | 86.564        | MF   | 2.1271      | 1.02710e5    | 804.78033    | 49.2471 |
| 2      | 92.732        | FM   | 2.2819      | 1.05851e5    | 773.11945    | 50.7529 |

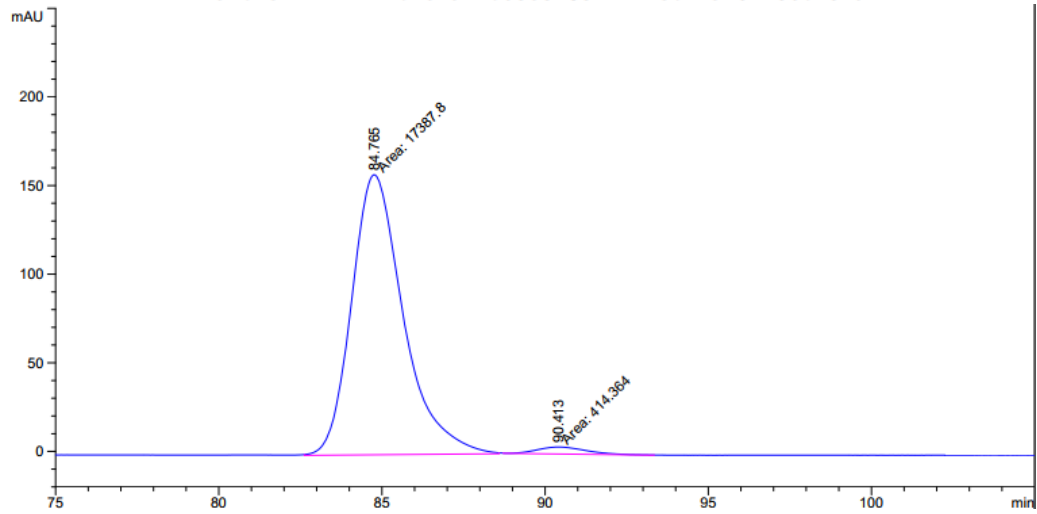

| Peak # | RetTime [min] | Type | Width [min] | Area [mAU*s] | Height [mAU] | Area %  |
|--------|---------------|------|-------------|--------------|--------------|---------|
| 1      | 84.765        | MM   | 1.8340      | 1.73878e4    | 158.01463    | 97.6724 |
| 2      | 90.413        | MM   | 1.7555      | 414.36432    | 3.93394      | 2.3276  |

**2-((1*S*,2*R*)-1-cyclopropyl-1-hydroxybut-3-en-2-yl)isoindoline-1,3-dione (**3n**)**

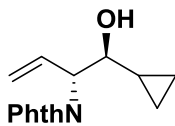

**3n**

Alcohol **2n** (14.4 mg, 0.2 mmol) was subjected to standard reaction conditions using 5 mol% of (R)-**Ir-V** as catalyst (100 °C, 48 h). Upon flash column chromatography (SiO<sub>2</sub>, 40:60 EtOAc:hexanes), the title compound **3n** (29.8 mg, 0.16 mmol, >20:1 dr) was obtained as a pale yellow solid in 58% yield.

**TLC** (SiO<sub>2</sub>) R<sub>f</sub> = 0.28 (20:80 EtOAc:hexanes)

**<sup>1</sup>H NMR** (500 MHz, CDCl<sub>3</sub>) δ: 7.85 (dd, *J* = 5.4, 3.1 Hz, 2H), 7.73 (dd, *J* = 5.4, 3.1 Hz, 2H), 6.38 (ddd, *J* = 17.6, 9.9, 7.9 Hz, 1H), 5.32 (dd, *J* = 13.7, 2.3 Hz, 2H), 4.93 – 4.79 (m, 1H), 3.40 (dd, *J* = 8.7, 5.8 Hz, 1H), 3.09 (s, 1H), 1.09 – 0.91 (m, 1H), 0.61 – 0.48 (m, 1H), 0.44 – 0.31 (m, 2H), 0.23 – 0.11 (m, 1H).

**<sup>13</sup>C NMR** (125 MHz, CDCl<sub>3</sub>) δ: 168.7, 134.4, 132.1, 131.8, 123.6, 120.0, 77.2, 76.3, 59.7, 15.3, 2.6, 2.4.

**HRMS** (Na<sup>+</sup>, *m/z*) for C<sub>15</sub>H<sub>15</sub>NO<sub>3</sub>: calcd. = 280.0944; found = 280.0946.

**FTIR** (neat): 3363, 2359, 2340, 1711, 1264, 1085, 733, 703.

**HPLC**: (Chiralcel column OD-H, Hexane:2-PrOH = 95:5, 1.0 mL/min, 230 nm) ee = 96%.

$[\alpha]_D^{24} = +20.4^\circ$  (*c* = 1.10, CHCl<sub>3</sub>).

**MP** [55 – 60] °C

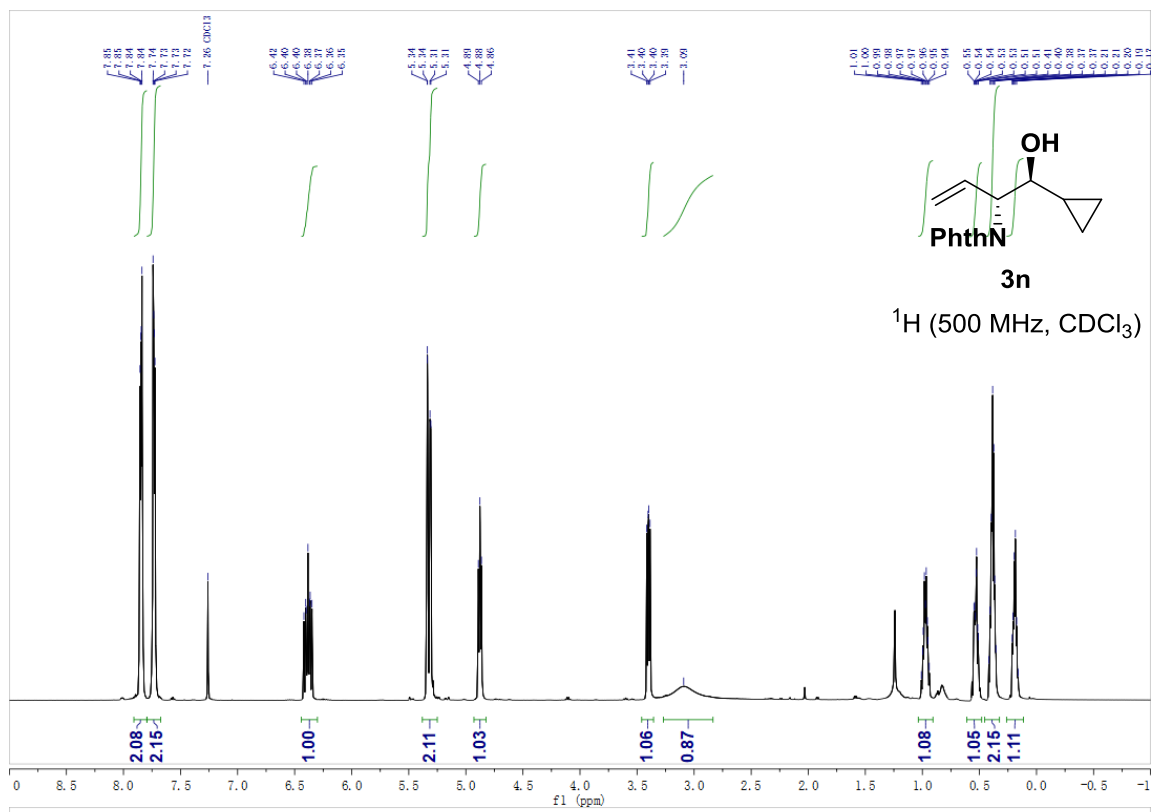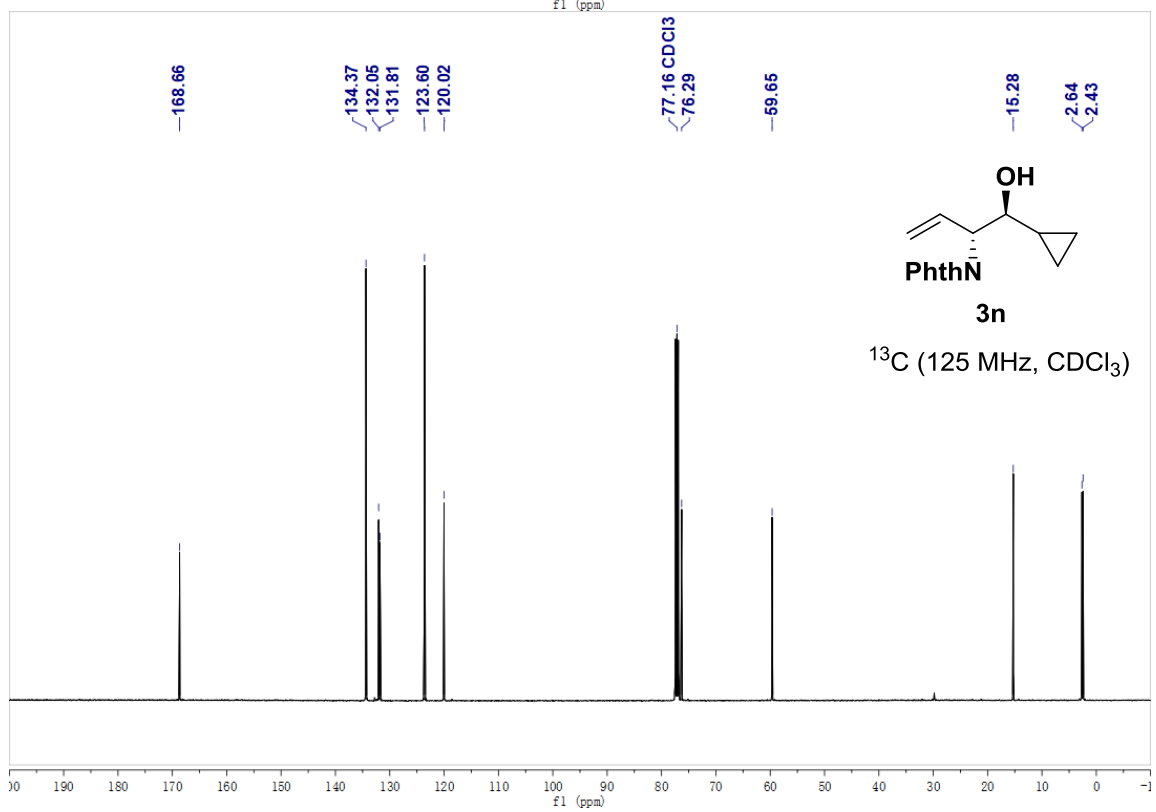

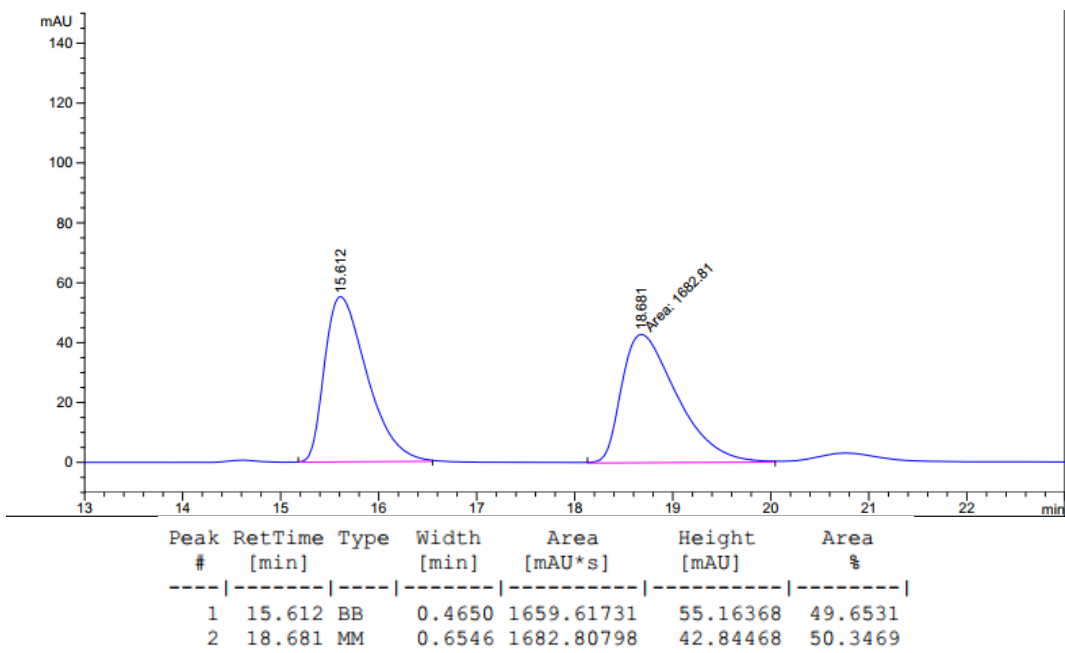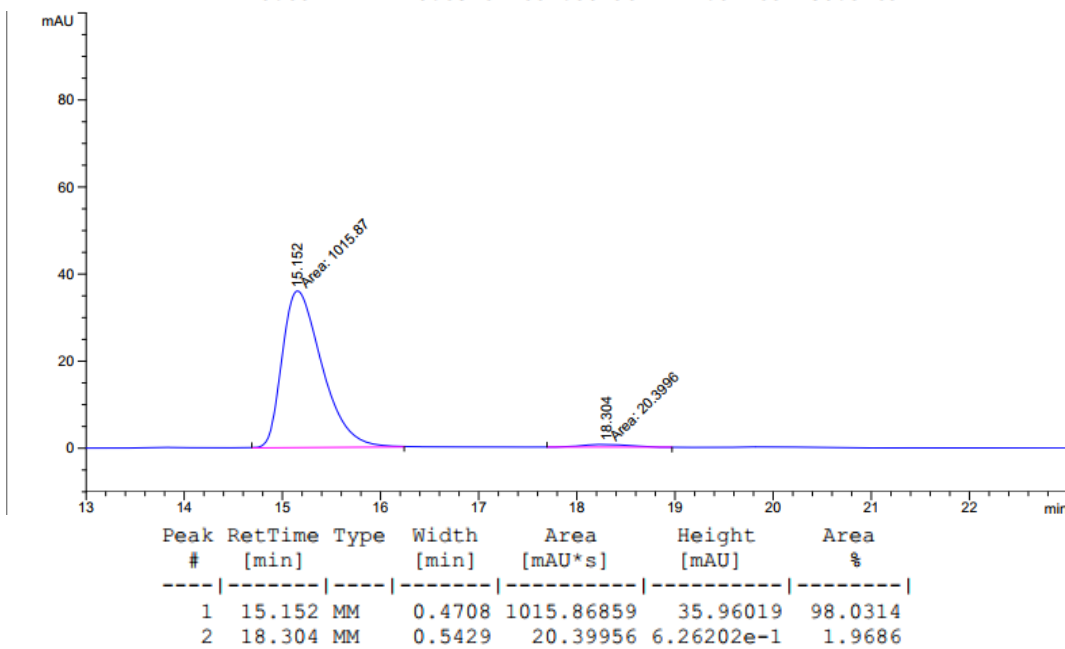



**2-((1*S*,2*R*)-1-cyclopropyl-1-hydroxybut-3-en-2-yl)isoindoline-1,3-dione (**3o**)**

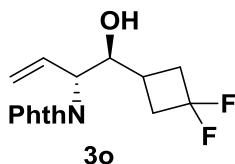

Alcohol **2o** (24.4 mg, 0.2 mmol) was subjected to standard reaction conditions with longer reaction time (100 °C, 72 h). Upon flash column chromatography (SiO<sub>2</sub>, 20:80 EtOAc:hexanes), the title compound **3o** (37.5 mg, 0.122 mmol, >20:1 dr) was obtained as a white solid in 61% yield.

**TLC (SiO<sub>2</sub>)** R<sub>f</sub> = 0.26 (20:80 EtOAc:hexanes)

**<sup>1</sup>H NMR** (500 MHz, CDCl<sub>3</sub>) δ: 7.86 (dd, *J* = 5.4, 3.0 Hz, 2H), 7.76 (dd, *J* = 5.4, 3.0 Hz, 2H), 6.26 (ddd, *J* = 17.2, 10.2, 8.2 Hz, 1H), 5.32 (dd, *J* = 20.1, 13.7 Hz, 2H), 4.63 (dd, *J* = 8.1, 4.1 Hz, 1H), 4.06 (d, *J* = 4.2 Hz, 1H), 3.73 (d, *J* = 2.1 Hz, 1H), 2.72 – 2.38 (m, 4H), 2.30 (dd, *J* = 8.0, 3.6 Hz, 1H).

**<sup>13</sup>C NMR** (125 MHz, CDCl<sub>3</sub>) δ: 168.8, 134.6, 134.5, 131.7, 130.8, 123.8, 123.7, 121.0, 77.2, 73.9, 57.7, 37.3 (m), 36.8 (m), 26.4.

**<sup>19</sup>F NMR** (470 MHz, CDCl<sub>3</sub>) δ: -82.3 (tt, *J* = 12.0, 5.9 Hz), -82.7 (ddt, *J* = 17.6, 11.9, 5.8 Hz), -96.6 (m), -97.0 (m).

**HRMS** (Na<sup>+</sup>, *m/z*) for C<sub>16</sub>H<sub>15</sub>F<sub>2</sub>NO<sub>3</sub>: calcd. = 330.0912; found = 330.0916.

**FTIR** (neat): 3469, 2631, 2340, 1705, 1382, 1296, 1265, 1070, 763.

**HPLC**: (Chiralcel column OD-H, Hexane:2-PrOH = 95:5, 1.0 mL/min, 230 nm) ee = 94%.

**[α]<sub>D</sub><sup>34</sup>** = +14.0° (*c* = 0.87, CHCl<sub>3</sub>).

**MP** [78 – 80] °C

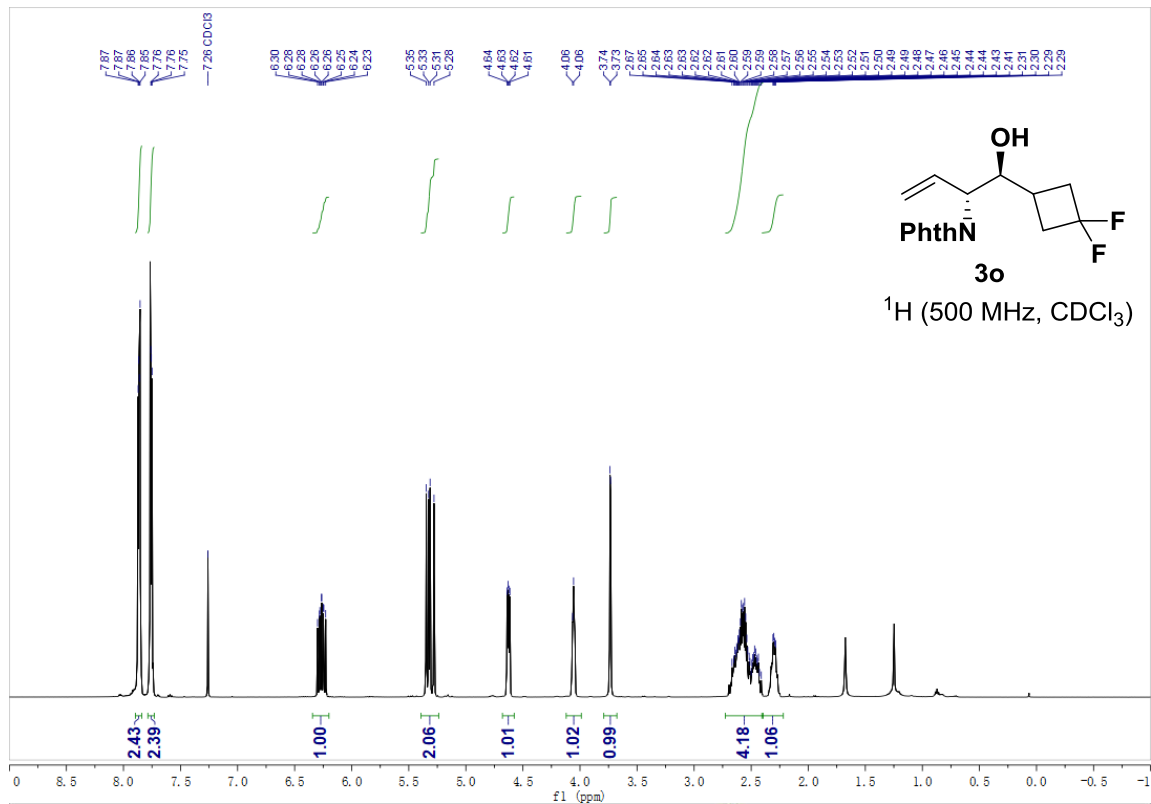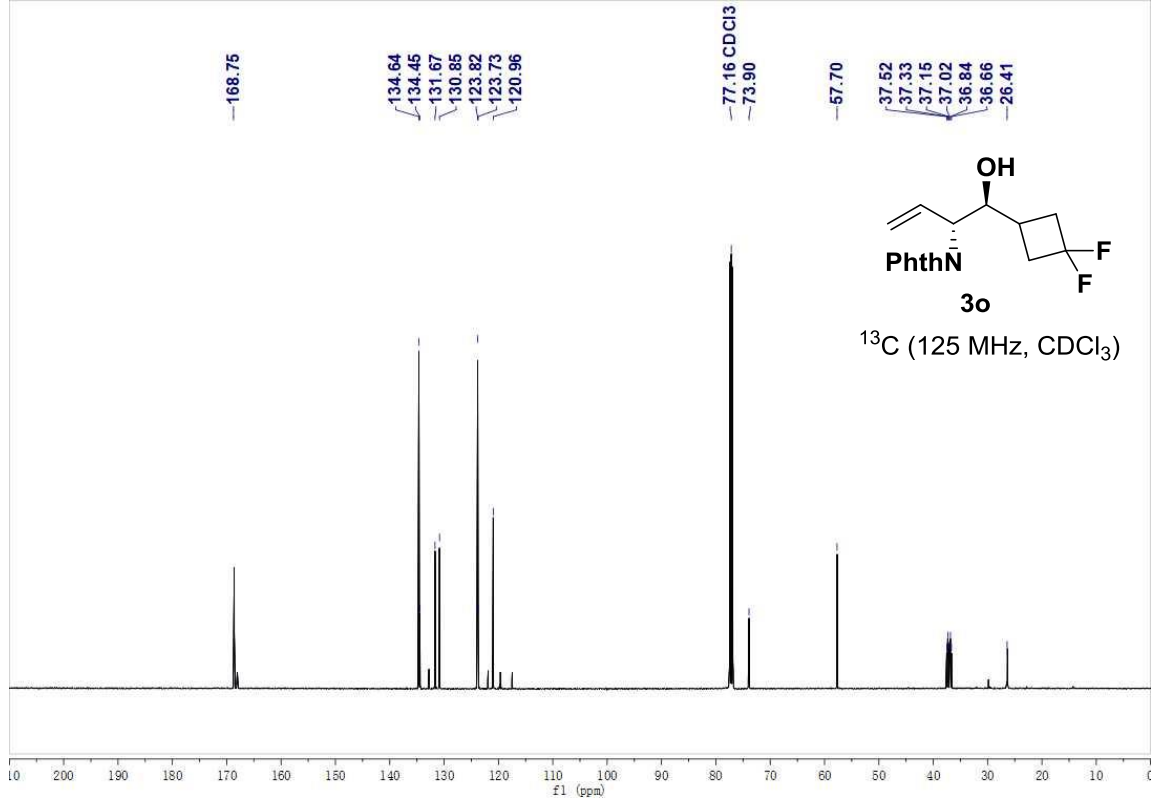

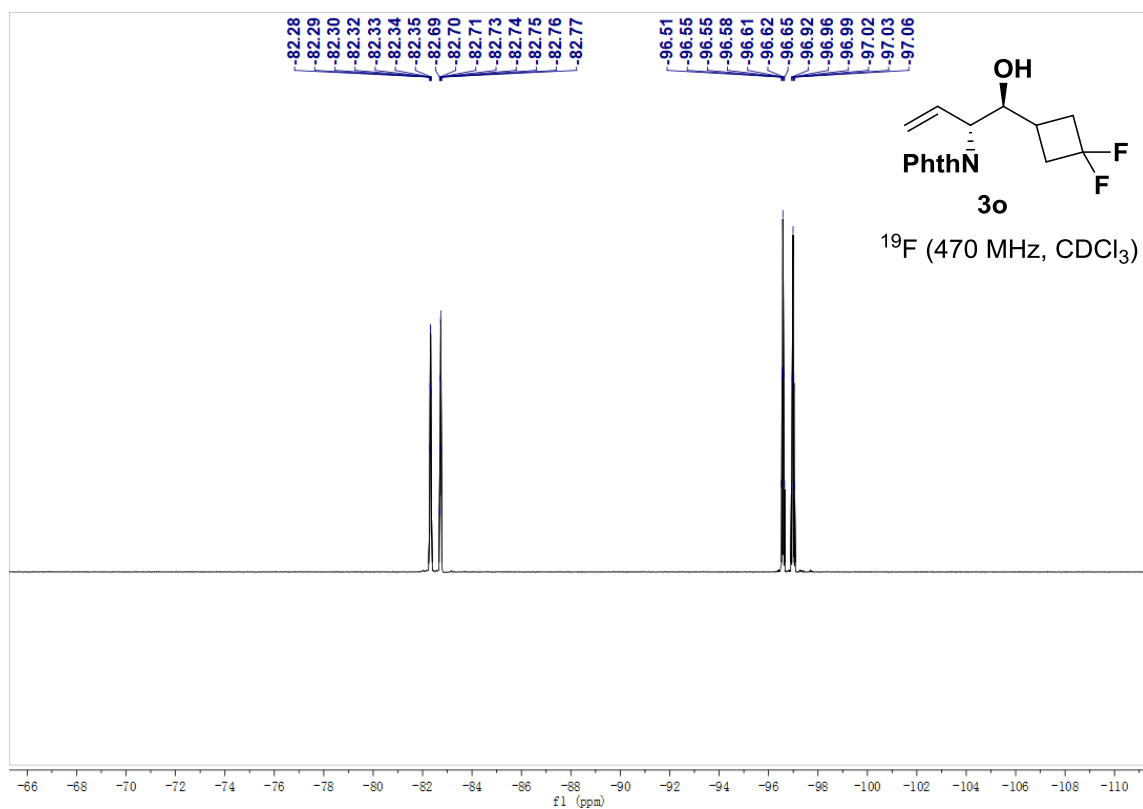

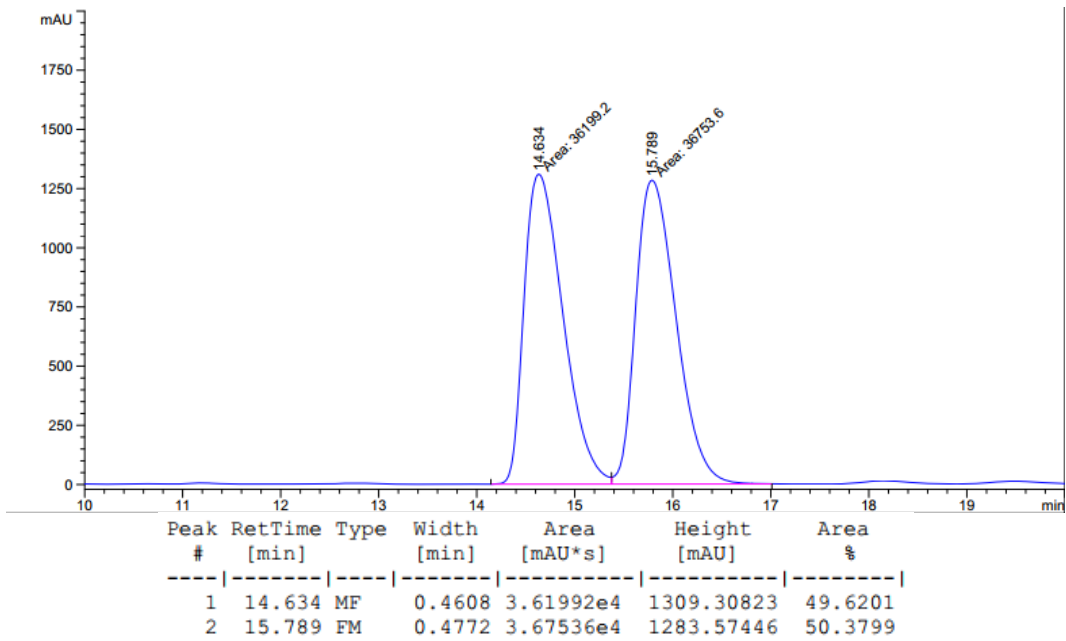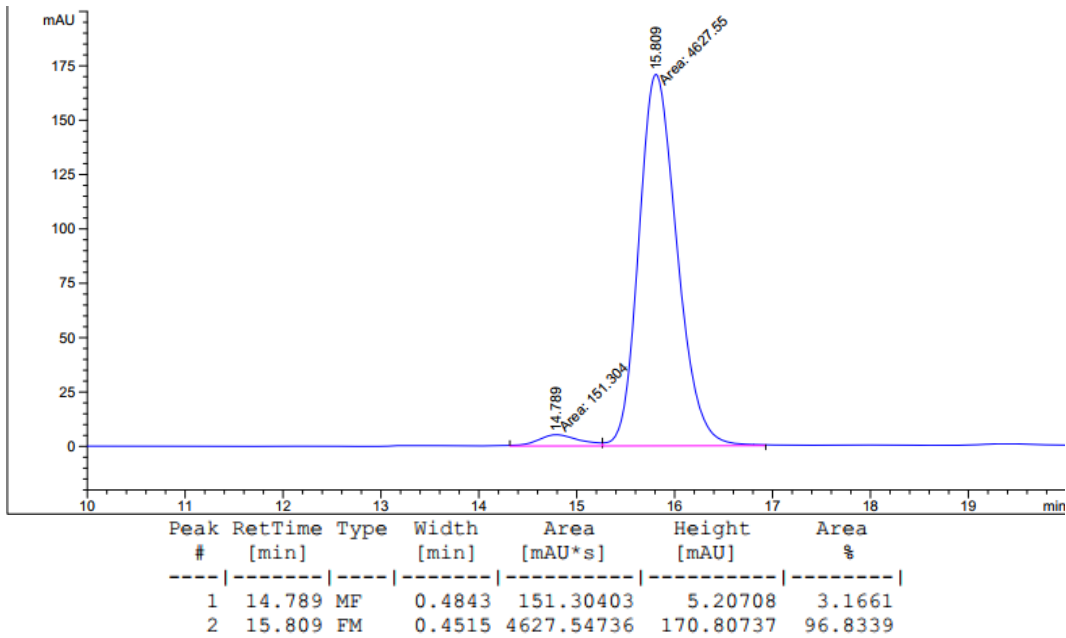

**tert-butyl  
carboxylate (3p)**

**3-((1S,2R)-2-(1,3-dioxisoindolin-2-yl)-1-hydroxybut-3-en-1-yl)azetidione-1-**

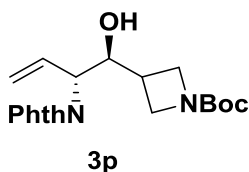

Alcohol **2p** (37.4 mg, 0.2 mmol) was subjected to standard reaction conditions (100 °C, 48 h). Upon flash column chromatography (SiO<sub>2</sub>, 30:70 EtOAc:hexanes), the title compound **3p** (49.9 mg, 0.134 mmol, >20:1 dr) was obtained as a light yellow solid in 67% yield.

**TLC (SiO<sub>2</sub>)** R<sub>f</sub> = 0.20 (30:70 EtOAc:hexanes)

**<sup>1</sup>H NMR** (500 MHz, CDCl<sub>3</sub>) δ: 7.85 (dd, *J* = 5.4, 3.1 Hz, 2H), 7.75 (dd, *J* = 5.4, 3.0 Hz, 2H), 6.30 – 6.21 (m, 1H), 5.29 (dd, *J* = 26.8, 13.7 Hz, 2H), 4.59 (dd, *J* = 8.1, 3.8 Hz, 1H), 4.18 (dd, *J* = 7.6, 3.8 Hz, 1H), 3.97 – 3.91 (m, 3H), 3.75 (dd, *J* = 8.5, 5.9 Hz, 1H), 2.74 – 2.64 (m, 1H), 1.40 (s, 9H).

**<sup>13</sup>C NMR** (125 MHz, CDCl<sub>3</sub>) δ: 168.6, 156.4, 134.5, 131.6, 130.7, 123.7, 120.8, 79.5, 77.2, 73.7, 57.4, 51.1, 31.8, 28.5.

**HRMS** (K<sup>+</sup>, *m/z*) for C<sub>20</sub>H<sub>24</sub>N<sub>2</sub>O<sub>5</sub>: calcd. = 411.1317; found = 411.1323.

**FTIR** (neat): 3362, 2360, 2341, 1706, 1275, 1260, 764, 750.

**HPLC**: (Chiralcel column OD-H, Hexane:2-PrOH = 95:5, 1.0 mL/min, 230 nm) ee = 97%.

[α]<sub>D</sub><sup>34</sup> = +27.7° (c = 0.64, CHCl<sub>3</sub>).

**MP** [90 – 93] °C

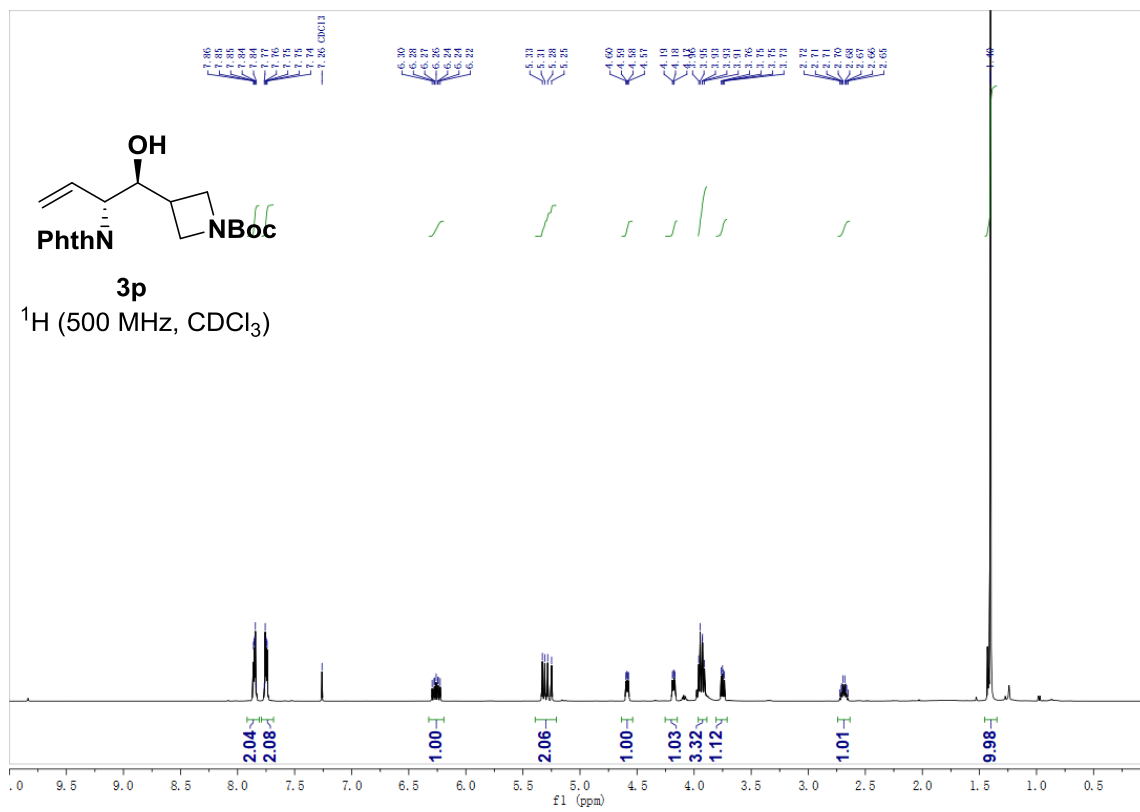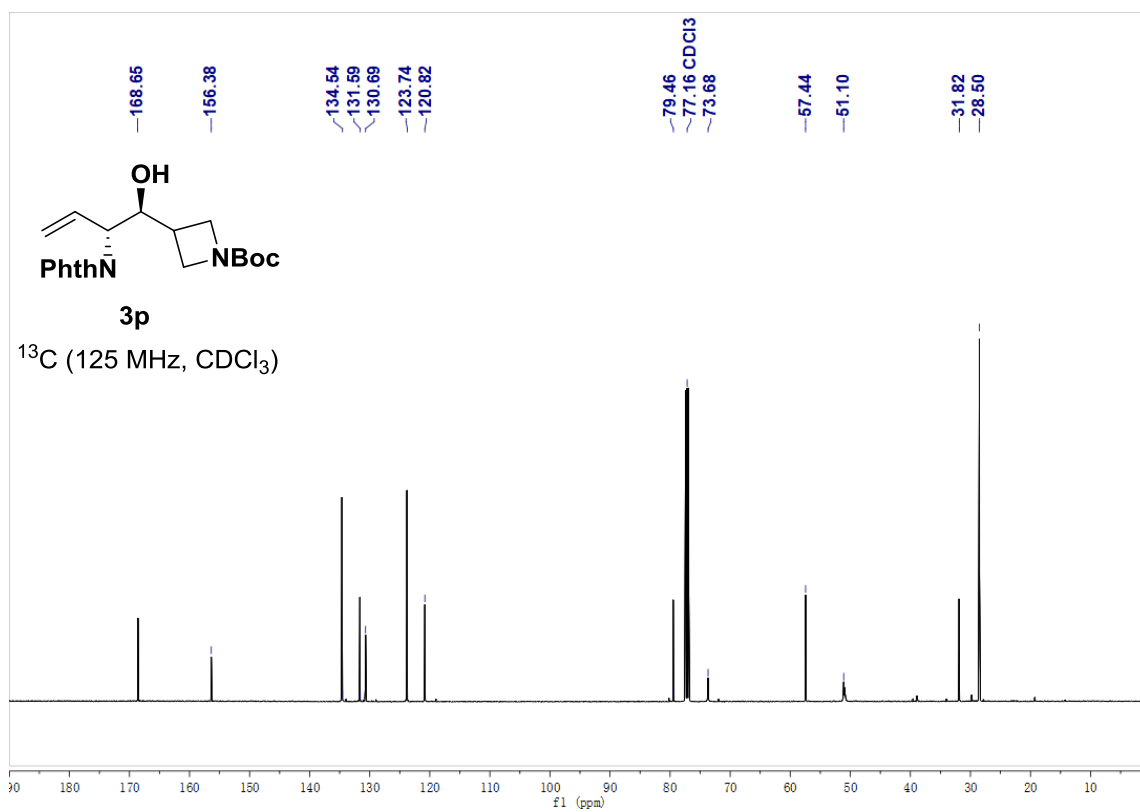

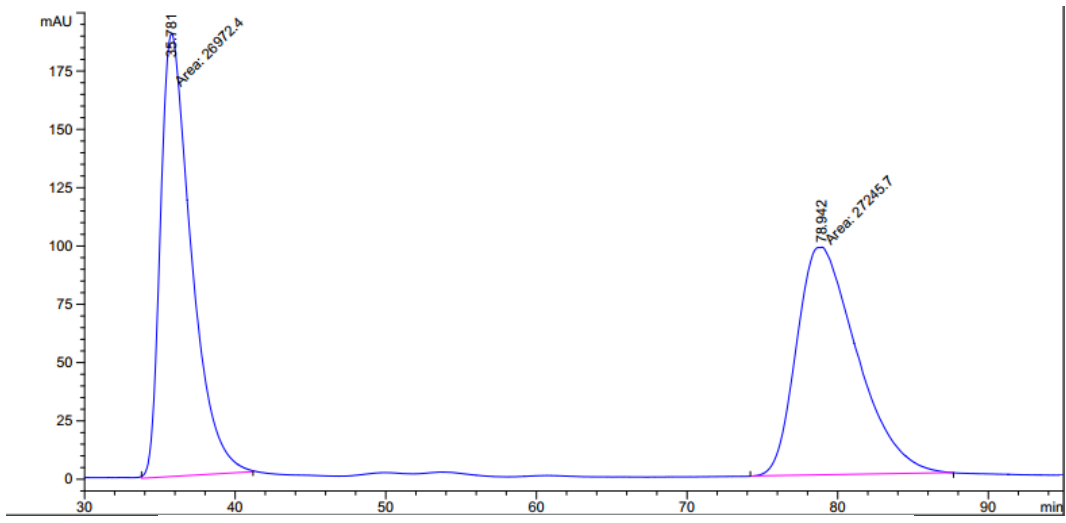

| Peak # | RetTime [min] | Type | Width [min] | Area [mAU*s] | Height [mAU] | Area %  |
|--------|---------------|------|-------------|--------------|--------------|---------|
| 1      | 35.781        | MM   | 2.3684      | 2.69724e4    | 189.80540    | 49.7479 |
| 2      | 78.942        | MM   | 4.6552      | 2.72457e4    | 97.54673     | 50.2521 |

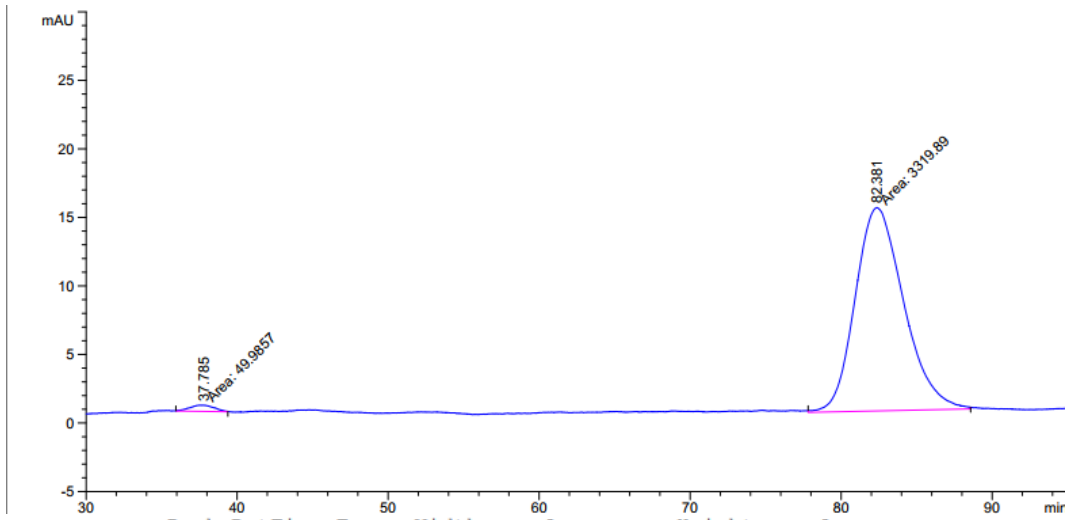

| Peak # | RetTime [min] | Type | Width [min] | Area [mAU*s] | Height [mAU] | Area %  |
|--------|---------------|------|-------------|--------------|--------------|---------|
| 1      | 37.785        | MM   | 1.8635      | 49.98568     | 4.47063e-1   | 1.4833  |
| 2      | 82.381        | MM   | 3.7299      | 3319.89307   | 14.83440     | 98.5167 |

**2-((1*S*,2*R*)-1-hydroxy-1-(oxetan-3-yl)but-3-en-2-yl)isoindoline-1,3-dione (**3q**)**

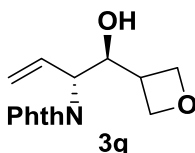

Alcohol **2q** (17.6 mg, 0.2 mmol) was subjected to standard reaction conditions (100 °C, 48 h). Upon flash column chromatography (SiO<sub>2</sub>, 30:70 EtOAc:hexanes), the title compound **3q** (43.0 mg, 0.16 mmol, >20:1 dr) was obtained as a pale yellow oil in 79% yield.

**TLC** (SiO<sub>2</sub>) R<sub>f</sub> = 0.28 (30:70 EtOAc:hexanes)

**<sup>1</sup>H NMR** (500 MHz, CDCl<sub>3</sub>) δ: 7.86 (dd, *J* = 5.4, 3.1 Hz, 2H), 7.76 (dd, *J* = 5.5, 3.0 Hz, 2H), 6.24 (ddd, *J* = 17.1, 10.3, 7.9 Hz, 1H), 5.32 (d, *J* = 10.7 Hz, 1H), 5.26 (d, *J* = 17.1 Hz, 1H), 4.75 (d, *J* = 7.1 Hz, 2H), 4.71 (dd, *J* = 8.1, 6.1 Hz, 1H), 4.56 – 4.53 (m, 2H), 4.36 (dd, *J* = 8.0, 3.5 Hz, 1H), 3.92 (brs, 1H), 3.23 – 3.15 (m, 1H).

**<sup>13</sup>C NMR** (125 MHz, CDCl<sub>3</sub>) δ: 168.7, 134.7, 131.7, 130.5, 123.9, 120.9, 74.1, 73.9, 73.4, 57.5, 38.2.

**HRMS** (Na<sup>+</sup>, *m/z*) for C<sub>15</sub>H<sub>15</sub>NO<sub>4</sub>: calcd. = 296.0893; found = 296.0901.

**FTIR** (neat): 3408, 2959, 2880, 1703, 1380, 973, 718.

**HPLC**: (Chiralcel column OD-H, Hexane:2-PrOH = 90:10, 1.0 mL/min, 230 nm) ee = 96%.

$[\alpha]_D^{34} = +38.7^\circ$  (*c* = 0.92, CHCl<sub>3</sub>).



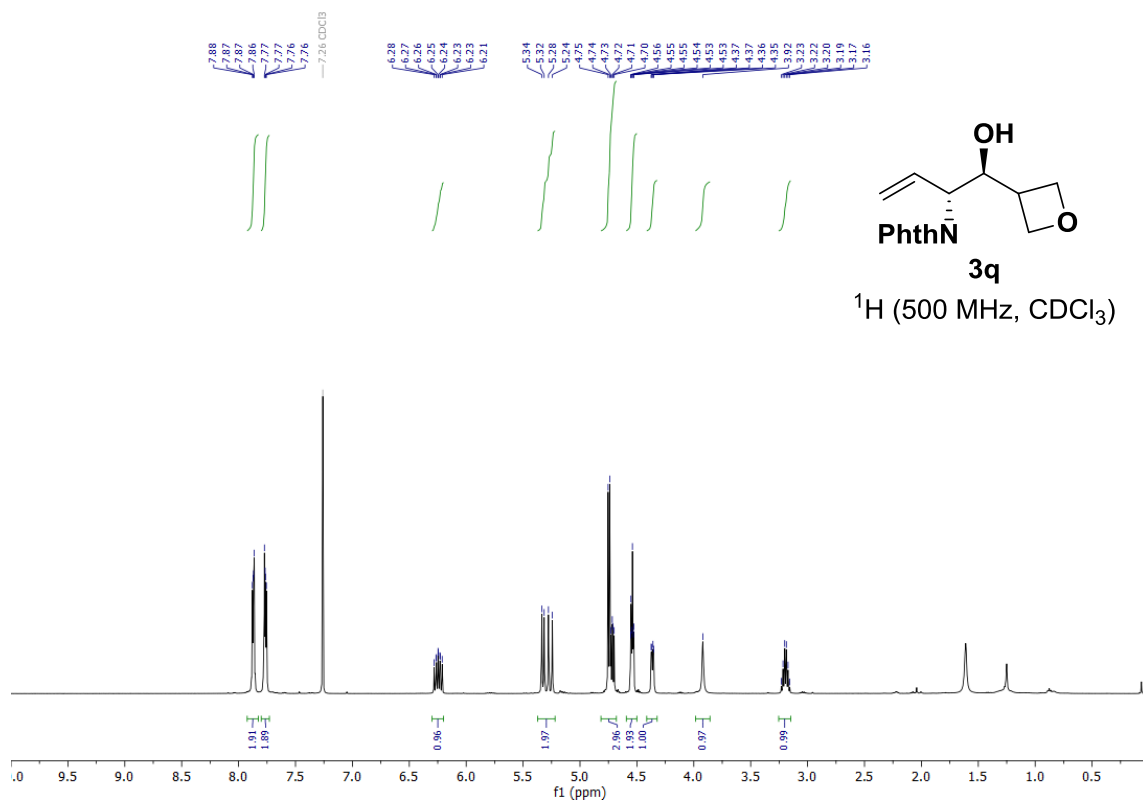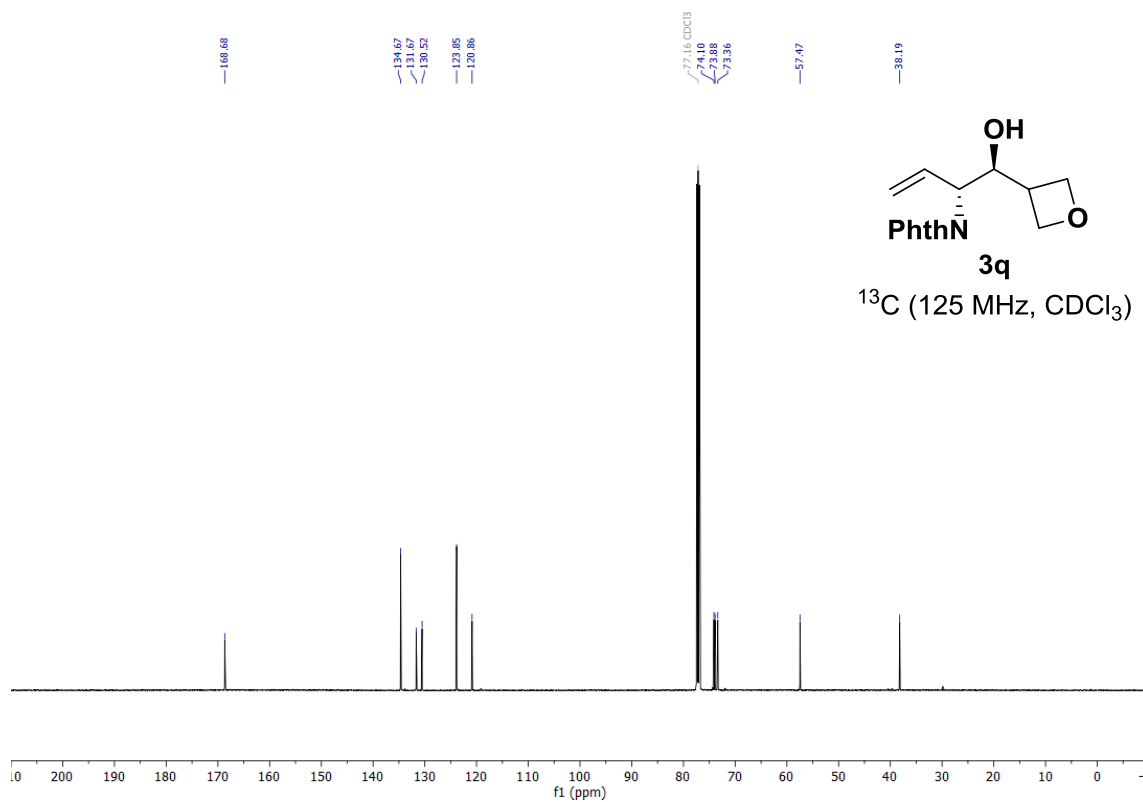

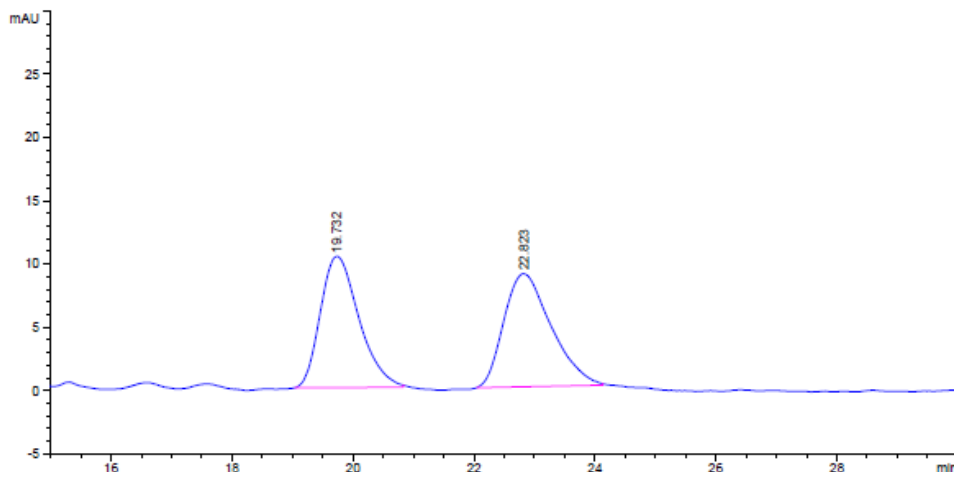

| Peak # | RetTime [min] | Type | Width [min] | Area [mAU*s] | Height [mAU] | Area %  |
|--------|---------------|------|-------------|--------------|--------------|---------|
| 1      | 19.732        | BB   | 0.6014      | 460.60611    | 10.38528     | 48.6908 |
| 2      | 22.823        | BB   | 0.7026      | 485.37595    | 8.95144      | 51.3092 |

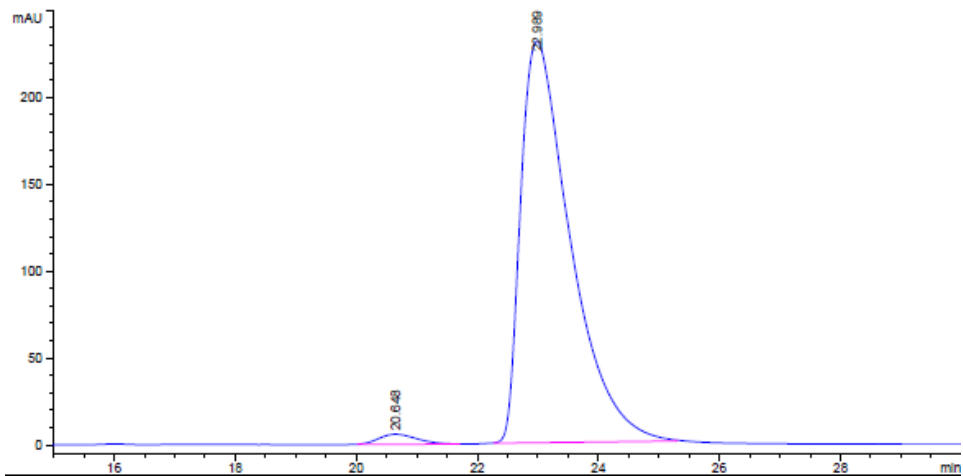

| Peak # | RetTime [min] | Type | Width [min] | Area [mAU*s] | Height [mAU] | Area %  |
|--------|---------------|------|-------------|--------------|--------------|---------|
| 1      | 20.648        | BB   | 0.5823      | 251.40669    | 5.76996      | 1.8696  |
| 2      | 22.989        | BB   | 0.8464      | 1.31956e4    | 231.01495    | 98.1304 |

***tert*-butyl 4-((1*S*,2*R*)-2-(1,3-dioxisoindolin-2-yl)-1-hydroxybut-3-en-1-yl)piperidine-1-carboxylate (**3r**)**

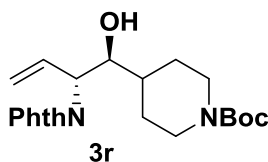

Alcohol **2r** (40.3 mg, 0.2 mmol) was subjected to standard reaction conditions (100 °C, 48 h). Upon flash column chromatography (SiO<sub>2</sub>, 25:75 EtOAc:hexanes), the title compound **3r** (56.0 mg, 0.14 mmol, >20:1 dr) was obtained as white solid in 70% yield.

**TLC** (SiO<sub>2</sub>) R<sub>f</sub> = 0.30 (30:70 EtOAc:hexanes)

**<sup>1</sup>H NMR** (500 MHz, CDCl<sub>3</sub>) δ: 7.86 (dd, *J* = 5.4, 3.0 Hz, 2H), 7.75 (dd, *J* = 5.4, 3.0 Hz, 2H), 6.33 – 6.23 (m, 1H), 5.34 – 5.23 (m, 2H), 4.89 (dd, *J* = 7.6, 4.2 Hz, 1H), 4.18 – 4.08 (m, 2H), 3.85 (dd, *J* = 6.0, 4.4 Hz, 1H), 3.58 (s, 1H), 2.71 – 2.56 (m, 2H), 1.90 (d, *J* = 13.2 Hz, 1H), 1.67 (d, *J* = 12.7 Hz, 1H), 1.61 – 1.52 (m, 1H), 1.44 (s, 9H), 1.41 – 1.28 (m, 2H)..

**<sup>13</sup>C NMR** (125 MHz, CDCl<sub>3</sub>) δ: 168.7, 154.9, 134.6, 131.8, 131.5, 123.8, 120.2, 79.5, 77.2, 75.5, 56.4, 39.0, 29.0, 28.6, 26.9.

**HRMS** (K<sup>+</sup>, *m/z*) for C<sub>22</sub>H<sub>28</sub>N<sub>2</sub>O<sub>5</sub>: calcd. = 439.1630; found = 439.1629.

**FTIR** (neat): 3725, 2989, 2360, 2341, 1707, 1275, 1260, 764, 749, 668.

**HPLC**: (Chiralcel column OD-H, Hexane:2-PrOH = 93:7, 1.0 mL/min, 230 nm) ee = 93%.

[α]<sub>D</sub><sup>34</sup> = +12.6° (c = 0.85, CHCl<sub>3</sub>).

**MP** [102 – 106] °C

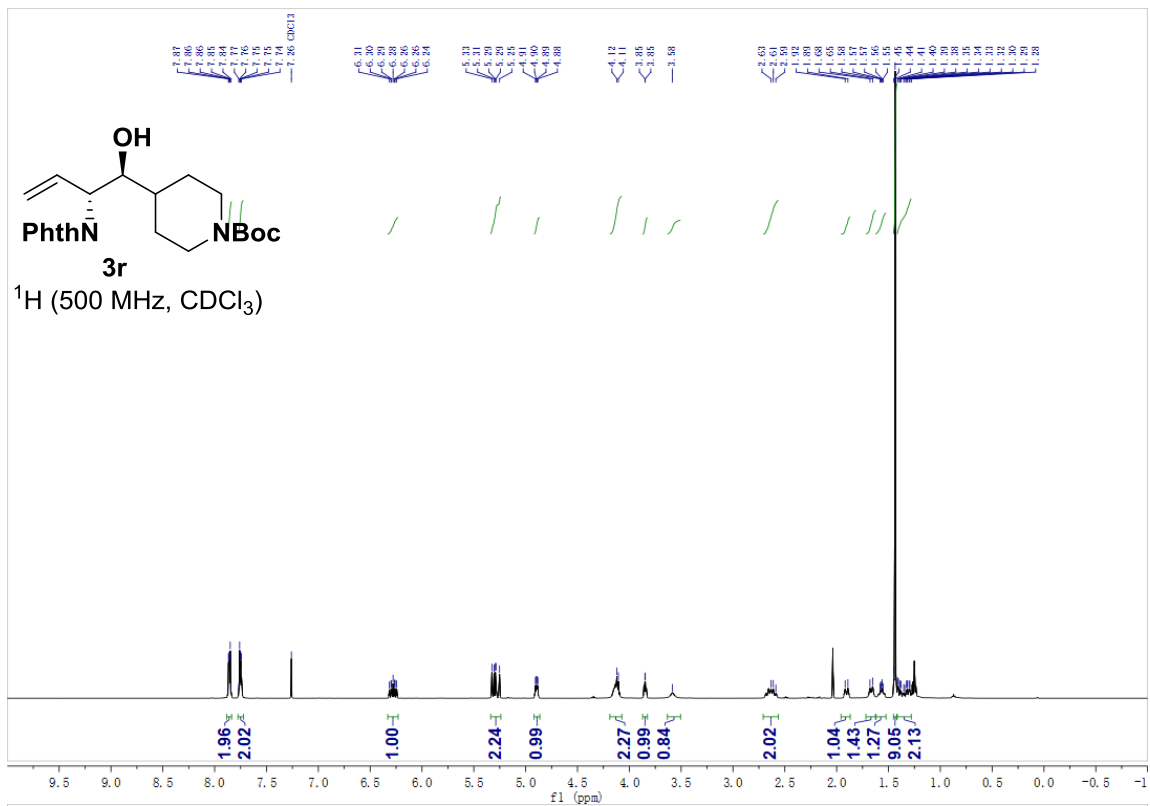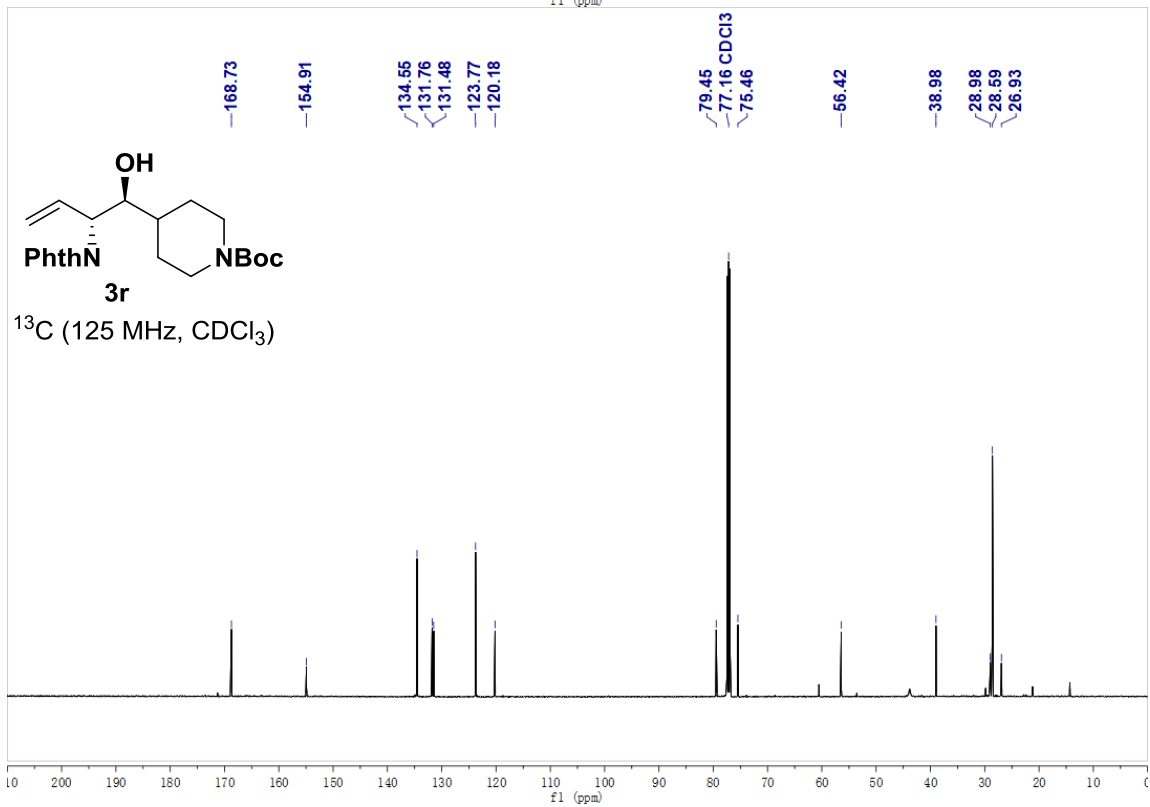

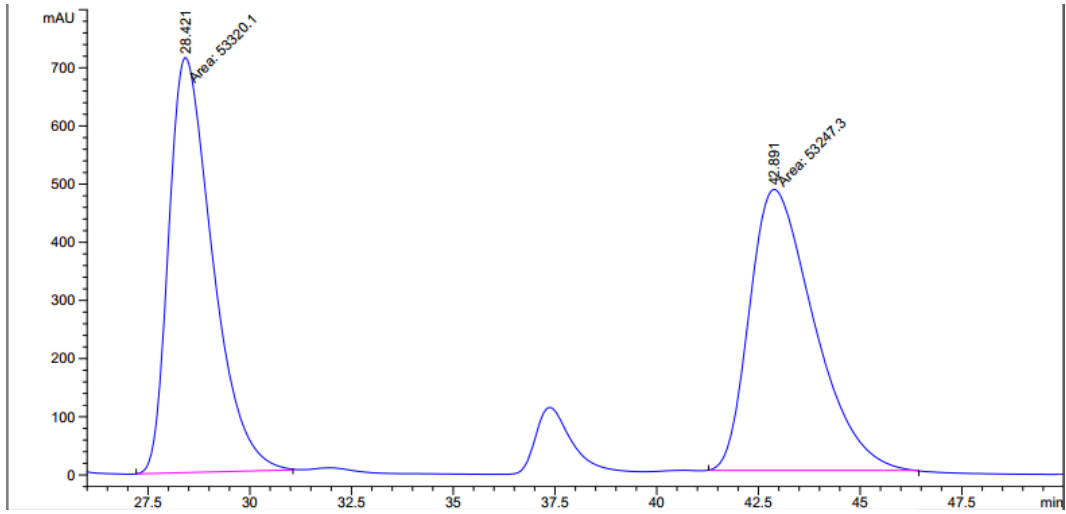

| Peak # | RetTime [min] | Type | Width [min] | Area [mAU*s] | Height [mAU] | Area %  |
|--------|---------------|------|-------------|--------------|--------------|---------|
| 1      | 28.421        | MM   | 1.2455      | 5.33201e4    | 713.50885    | 50.0341 |
| 2      | 42.891        | MM   | 1.8368      | 5.32473e4    | 483.16492    | 49.9659 |

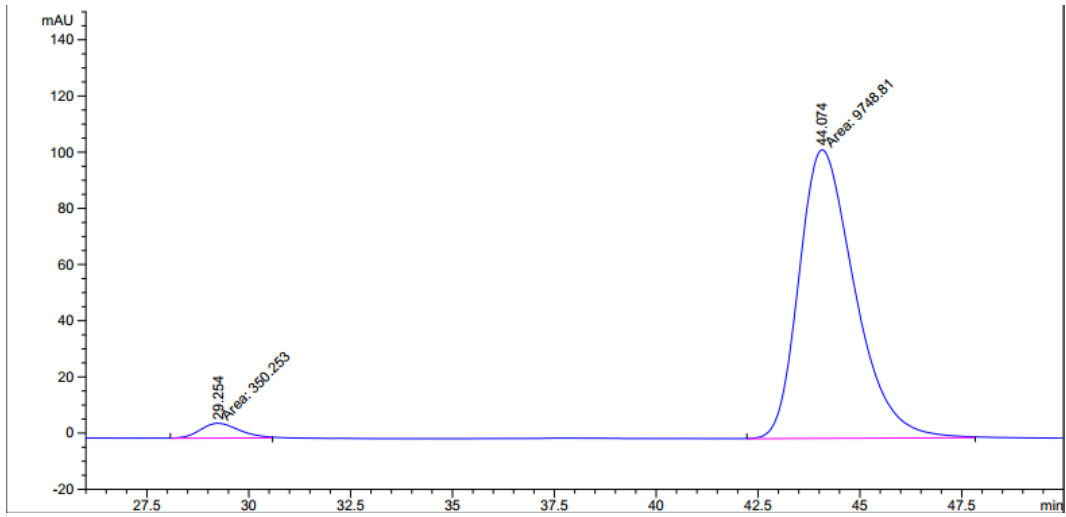

| Peak # | RetTime [min] | Type | Width [min] | Area [mAU*s] | Height [mAU] | Area %  |
|--------|---------------|------|-------------|--------------|--------------|---------|
| 1      | 29.254        | MM   | 1.1063      | 350.25256    | 5.27671      | 3.4682  |
| 2      | 44.074        | MM   | 1.5813      | 9748.81250   | 102.74837    | 96.5318 |

**2-((1*S*,2*R*)-1-hydroxy-1-(tetrahydro-2H-pyran-4-yl)but-3-en-2-yl)isoindoline-1,3-dione (**3s**)**

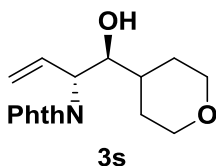

Alcohol **2s** (23.2 mg, 0.2 mmol) was subjected to standard reaction conditions with 7.5 mol% catalyst (100 °C, 48 h). Upon flash column chromatography (SiO<sub>2</sub>, 30:70 EtOAc:hexanes), the title compound **3s** (47.6 mg, 0.158 mmol, >20:1 dr) was obtained as colorless oil in 79% yield.

**TLC** (SiO<sub>2</sub>) R<sub>f</sub> = 0.24 (30:70 EtOAc:hexanes)

**<sup>1</sup>H NMR** (500 MHz, CDCl<sub>3</sub>) δ: 7.86 (dd, *J* = 5.3, 3.1 Hz, 2H), 7.75 (dd, *J* = 5.3, 3.0 Hz, 2H), 6.28 (ddd, *J* = 17.6, 10.2, 7.7 Hz, 1H), 5.29 (dd, *J* = 26.4, 13.7 Hz, 2H), 4.90 (dd, *J* = 7.4, 3.8 Hz, 1H), 3.99 (d, *J* = 11.8 Hz, 2H), 3.82 (dd, *J* = 6.3, 4.0 Hz, 1H), 3.71 (s, 1H), 3.40 – 3.28 (m, 2H), 1.85 (d, *J* = 13.3 Hz, 1H), 1.72 – 1.43 (m, 4H).

**<sup>13</sup>C NMR** (125 MHz, CDCl<sub>3</sub>) δ: 168.7, 134.6, 131.8, 131.5, 123.8, 120.1, 77.2, 75.8, 68.1, 67.7, 56.2, 37.9, 29.7, 28.0.

**HRMS** (H<sup>+</sup>, *m/z*) for C<sub>17</sub>H<sub>19</sub>NO<sub>4</sub>: calcd. = 302.1387; found = 302.1392.

**FTIR** (neat): 2987, 2360, 2341, 1705, 1383, 1266, 1079, 731.

**HPLC**: (Chiralcel column AD-H, Hexane:2-PrOH = 95:5, 1.0 mL/min, 230 nm) ee = 94%.

[α]<sub>D</sub><sup>24</sup> = +42.7° (c = 0.70, CHCl<sub>3</sub>).

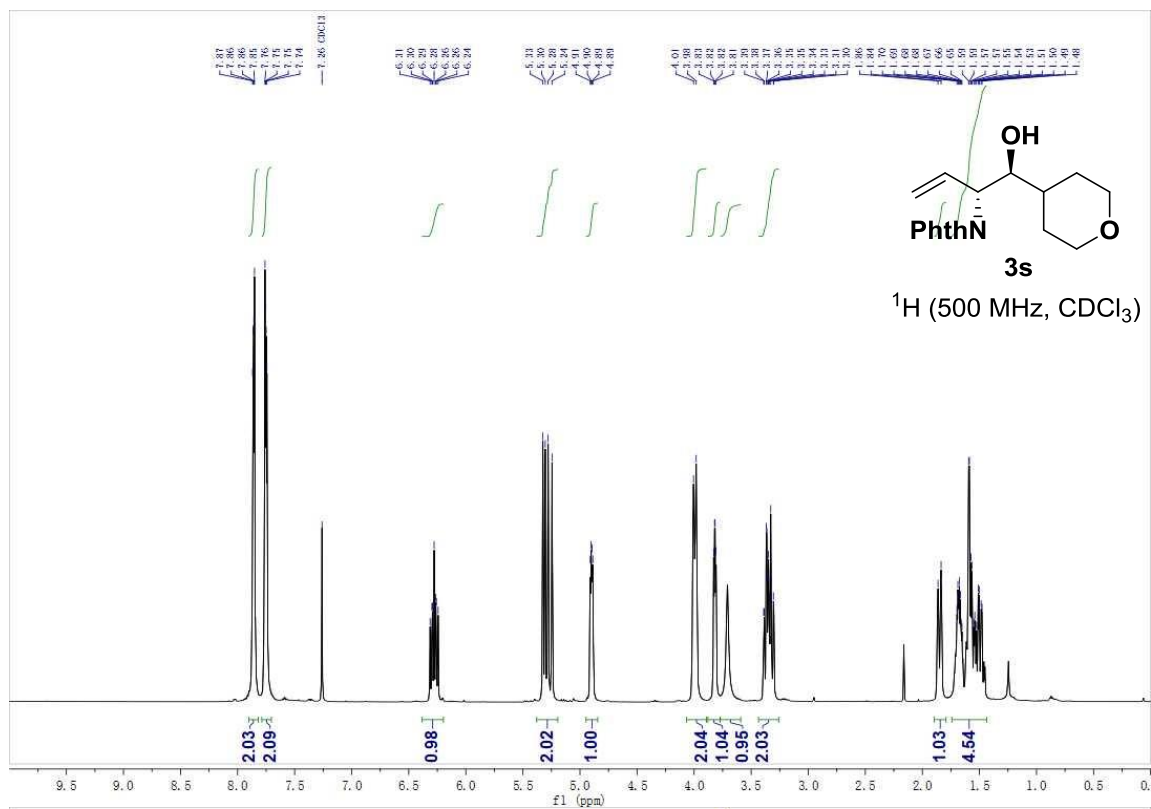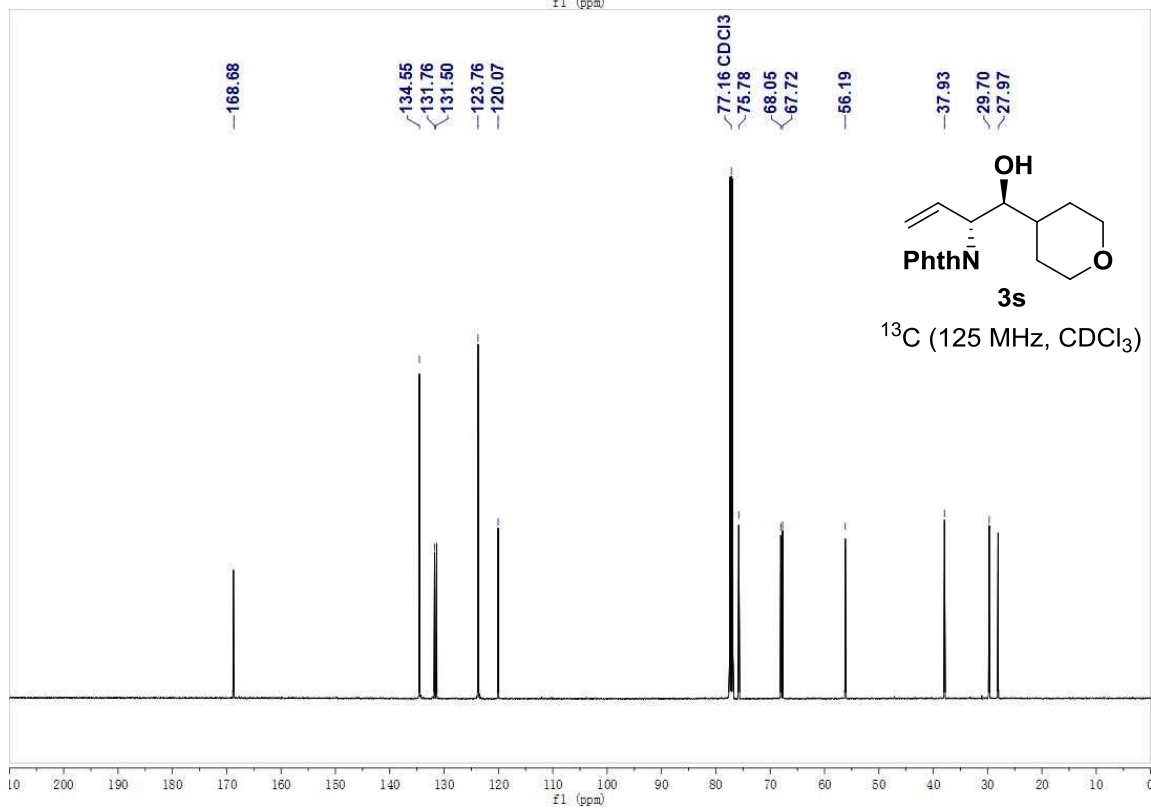

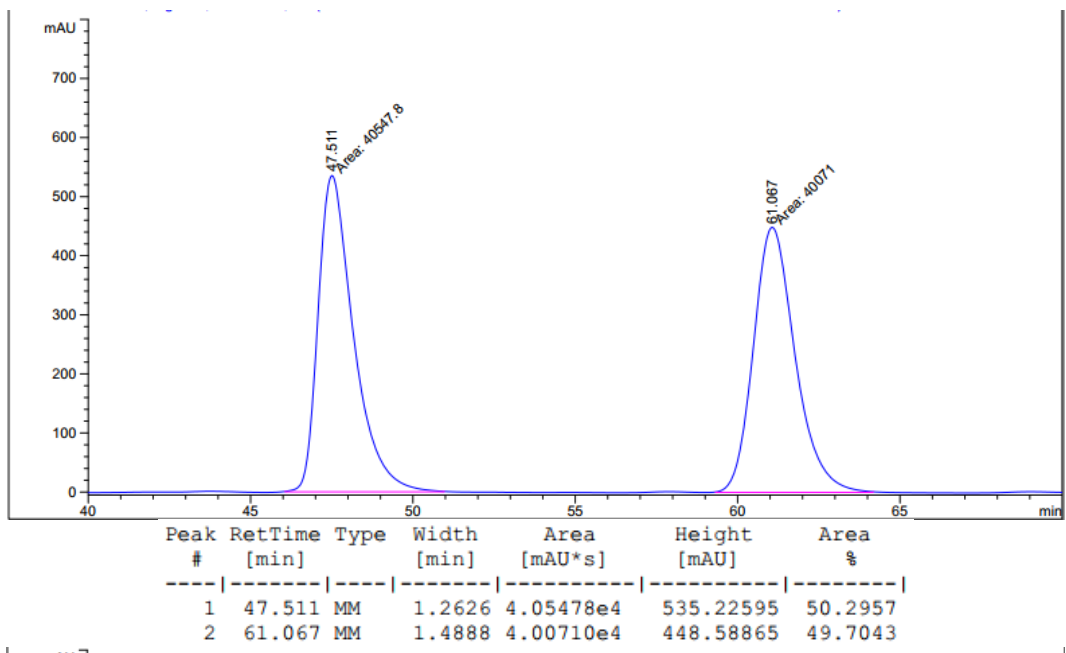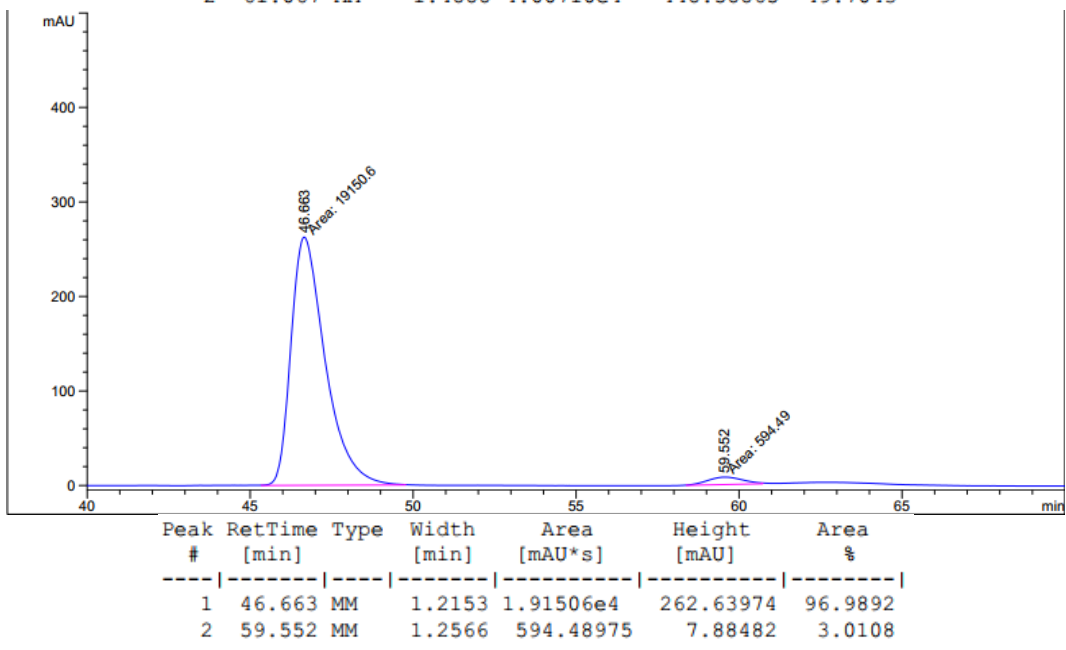



**2-((1*S*,2*R*)-1-(1-(benzo[*d*]thiazol-2-yl)piperidin-4-yl)-1-hydroxybut-3-en-2-yl)isoindoline-1,3-dione (**3t**)**

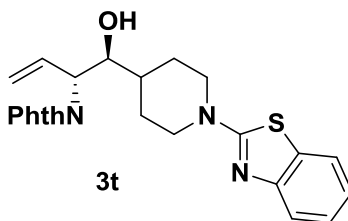

Alcohol **2t** (49.7 mg, 0.2 mmol) was subjected to standard reaction conditions (100 °C, 48 h). Upon flash column chromatography (SiO<sub>2</sub>, 30:70 EtOAc:hexanes), the title compound **3t** (58.0 mg, 0.134 mmol, >20:1 dr) was obtained as a light yellow solid in 67% yield.

**TLC** (SiO<sub>2</sub>) R<sub>f</sub> = 0.30 (30:70 EtOAc:hexanes)

**<sup>1</sup>H NMR** (500 MHz, CDCl<sub>3</sub>) δ: 7.87 (dd, *J* = 5.4, 3.1 Hz, 2H), 7.76 (dd, *J* = 5.5, 3.0 Hz, 2H), 7.56 (dd, *J* = 17.4, 7.9 Hz, 2H), 7.28 (d, *J* = 7.2 Hz, 1H), 7.05 (t, *J* = 7.6 Hz, 1H), 6.30 (ddd, *J* = 17.8, 10.3, 7.8 Hz, 1H), 5.33 (dd, *J* = 19.2, 13.7 Hz, 2H), 4.92 (dd, *J* = 7.6, 4.2 Hz, 1H), 4.24 (d, *J* = 12.4 Hz, 1H), 4.14 (dd, *J* = 9.7, 7.3 Hz, 1H), 3.90 (t, *J* = 6.1 Hz, 1H), 3.63 (d, *J* = 2.4 Hz, 1H), 3.15 – 3.03 (m, 2H), 2.09 (d, *J* = 13.2 Hz, 1H), 1.84 (d, *J* = 12.5 Hz, 1H), 1.74 – 1.51 (m, 4H), 1.26 (t, *J* = 7.1 Hz, 1H).

**<sup>13</sup>C NMR** (125 MHz, CDCl<sub>3</sub>) δ: 168.7, 134.6, 131.7, 131.3, 126.1, 123.9, 121.4, 120.8, 120.5, 119.0, 77.2, 75.2, 56.5, 49.1, 48.6, 38.8, 28.5, 26.5.

**HRMS** (H<sup>+</sup>, *m/z*) for C<sub>24</sub>H<sub>23</sub>N<sub>3</sub>O<sub>3</sub>S: calcd. = 434.1533; found = 434.1534.

**FTIR** (neat): 2923, 2360, 2341, 1705, 1356, 1275, 763, 750.

**HPLC**: (Chiralcel column AD-H, Hexane:2-PrOH = 95:5, 1.0 mL/min, 230 nm) ee = 94%.

**[α]<sub>D</sub><sup>34</sup>** = +52.0° (*c* = 0.72, CHCl<sub>3</sub>).

**MP** [80 – 84] °C

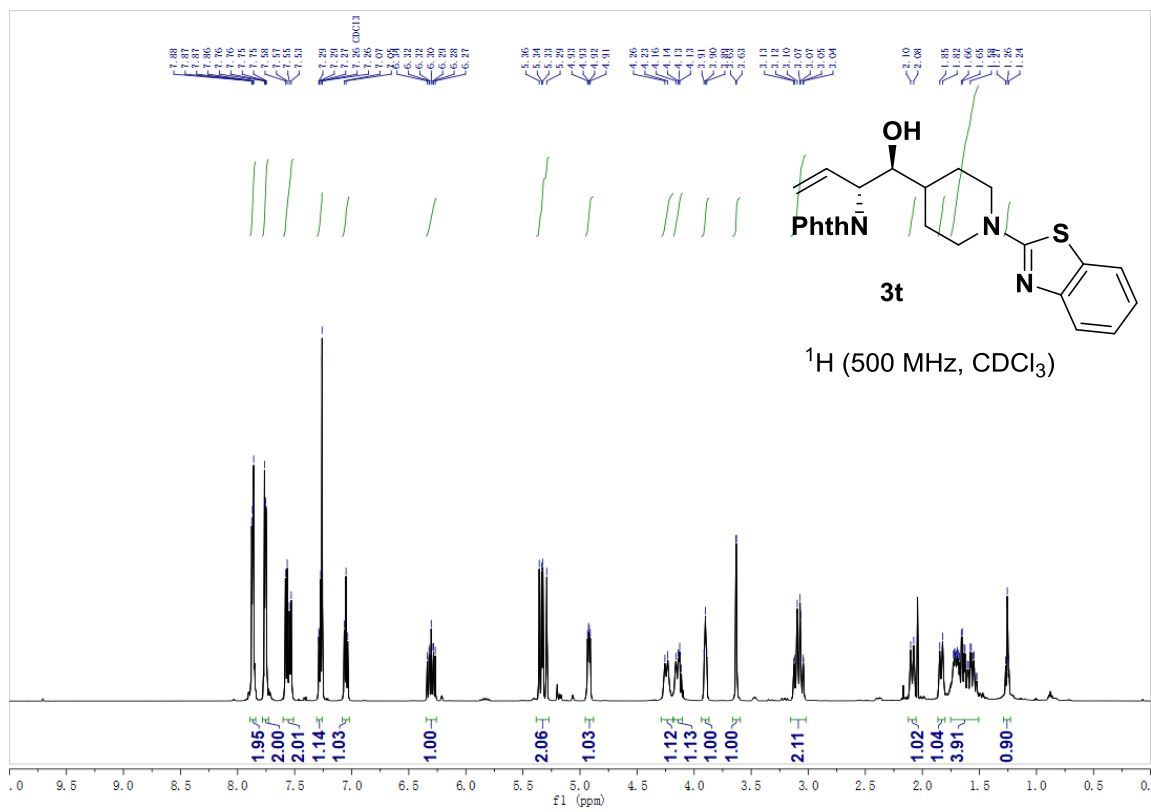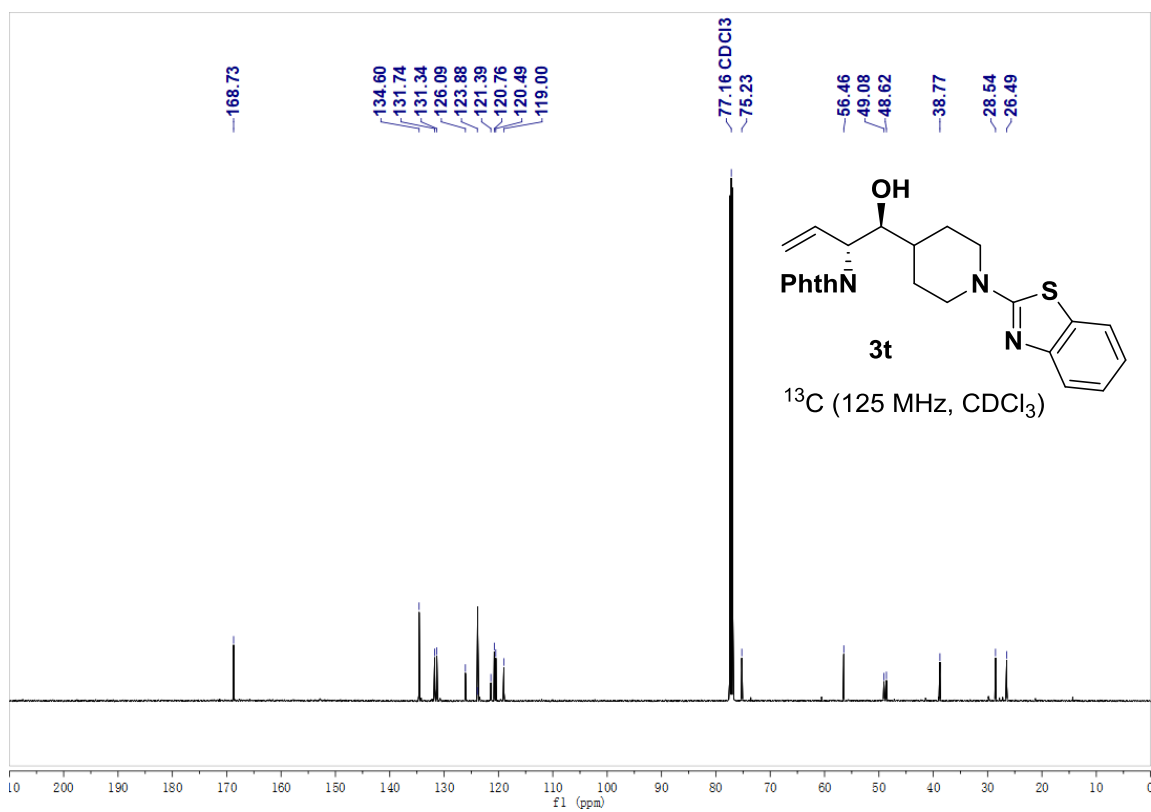

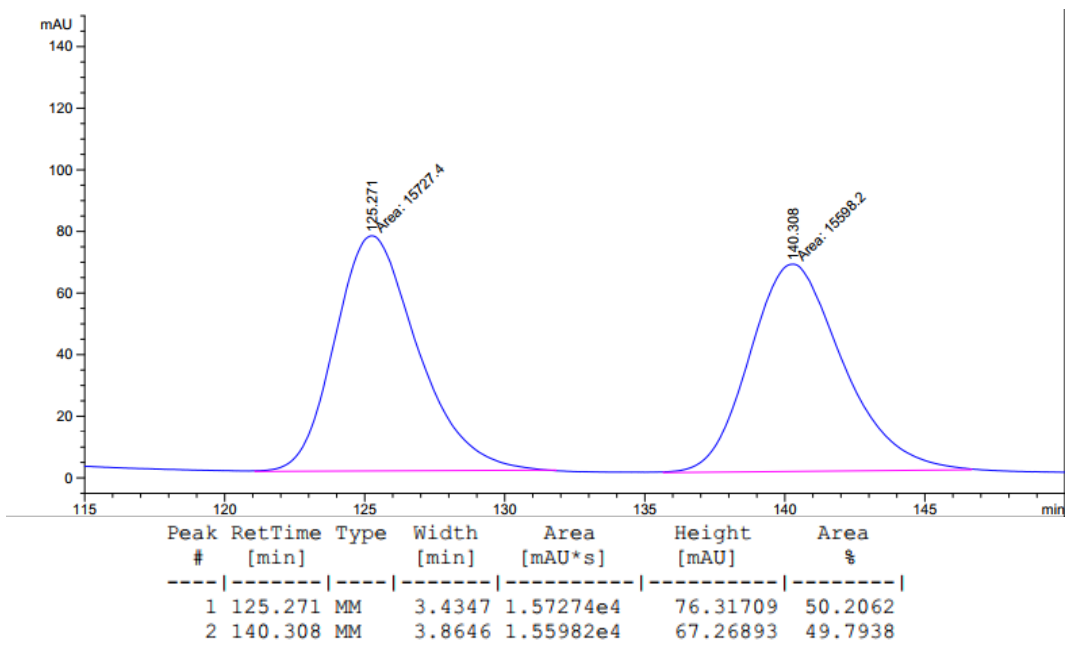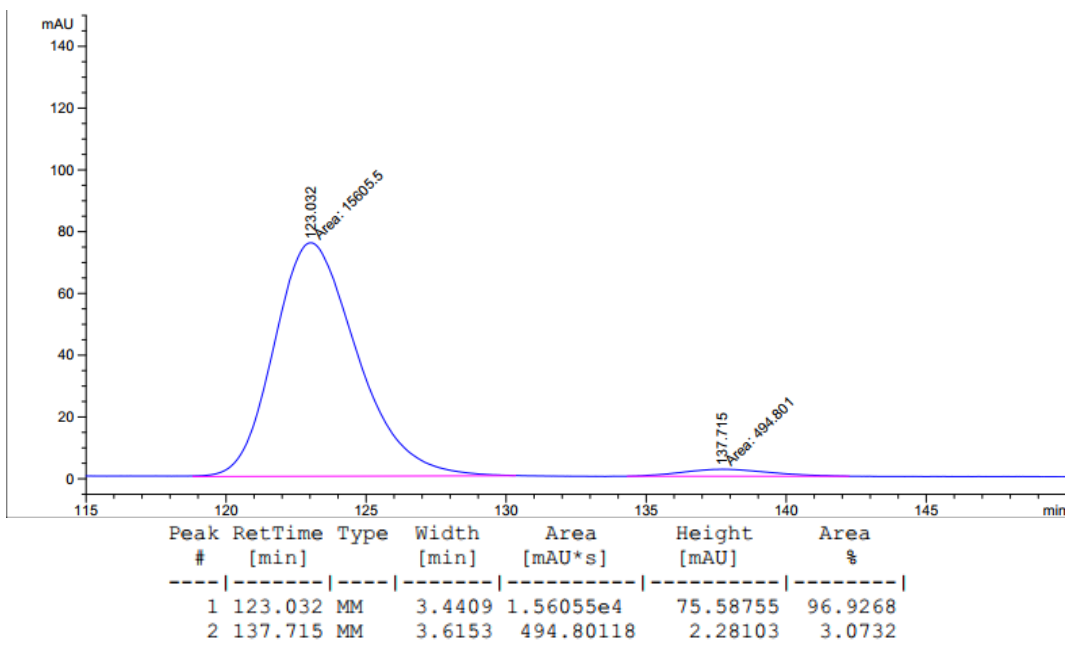

**2-((1*S*,2*R*)-1-hydroxy-1-(1-(pyrimidin-2-yl)piperidin-4-yl)but-3-en-2-yl)isoindoline-1,3-dione (3u)**

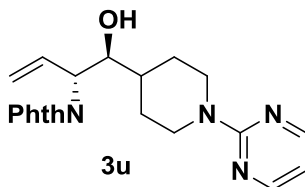

Alcohol **2u** (38.6 mg, 0.2 mmol) was subjected to standard reaction conditions (100 °C, 48 h) using 7.5 mol% of (R)-Ir-**VI**. Upon flash column chromatography (SiO<sub>2</sub>, 30:70 EtOAc:hexanes), the title compound **3u** (54.5 mg, 0.144 mmol, >20:1 dr) was obtained as a pale yellow oil in 72% yield.

**TLC** (SiO<sub>2</sub>) R<sub>f</sub> = 0.2 (30:70 EtOAc:hexanes)

**<sup>1</sup>H NMR** (500 MHz, CDCl<sub>3</sub>) δ: 8.28 (d, *J* = 4.7 Hz, 2H), 7.86 (dd, *J* = 5.4, 3.1 Hz, 2H), 7.75 (dd, *J* = 5.4, 3.0 Hz, 2H), 6.43 (t, *J* = 4.7 Hz, 1H), 6.36 – 6.24 (m, 1H), 5.31 (dd, *J* = 20.9, 13.7 Hz, 2H), 4.94 (dd, *J* = 7.5, 4.1 Hz, 1H), 4.80 (d, *J* = 12.0 Hz, 2H), 3.90 – 3.83 (m, 1H), 3.62 (d, *J* = 2.4 Hz, 1H), 2.82 (dtd, *J* = 15.5, 13.1, 2.5 Hz, 2H), 2.03 (d, *J* = 13.1 Hz, 1H), 1.79 (d, *J* = 12.8 Hz, 1H), 1.72 (tt, *J* = 6.8, 4.2 Hz, 1H), 1.44 (dddd, *J* = 29.0, 25.0, 12.6, 4.3 Hz, 2H)..

**<sup>13</sup>C NMR** (125 MHz, CDCl<sub>3</sub>) δ: 168.8, 157.8, 134.5, 131.8, 131.5, 123.8, 120.1, 77.2, 75.6, 56.5, 44.0, 43.9, 39.3, 28.9, 26.9.

**HRMS** (Na<sup>+</sup>, *m/z*) for C<sub>21</sub>H<sub>22</sub>N<sub>4</sub>O<sub>3</sub>: calcd. = 401.1584; found = 401.1594.

**FTIR** (neat): 3356, 1707, 1587, 1264, 1073, 976, 733, 703.

**HPLC**: (Chiralcel column OD-H, Hexane:2-PrOH = 95:5, 1.0 mL/min, 230 nm) ee = 95%.

[α]<sub>D</sub><sup>34</sup> = +35.5° (c = 0.77, CHCl<sub>3</sub>).

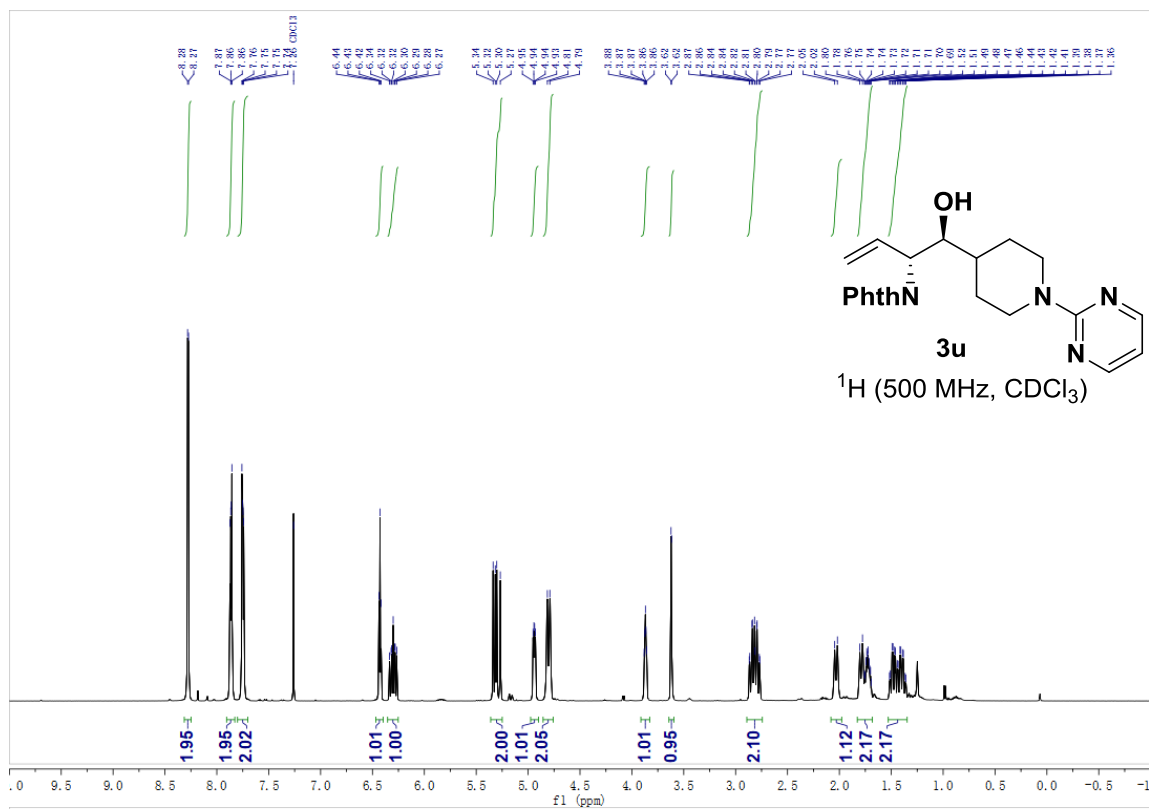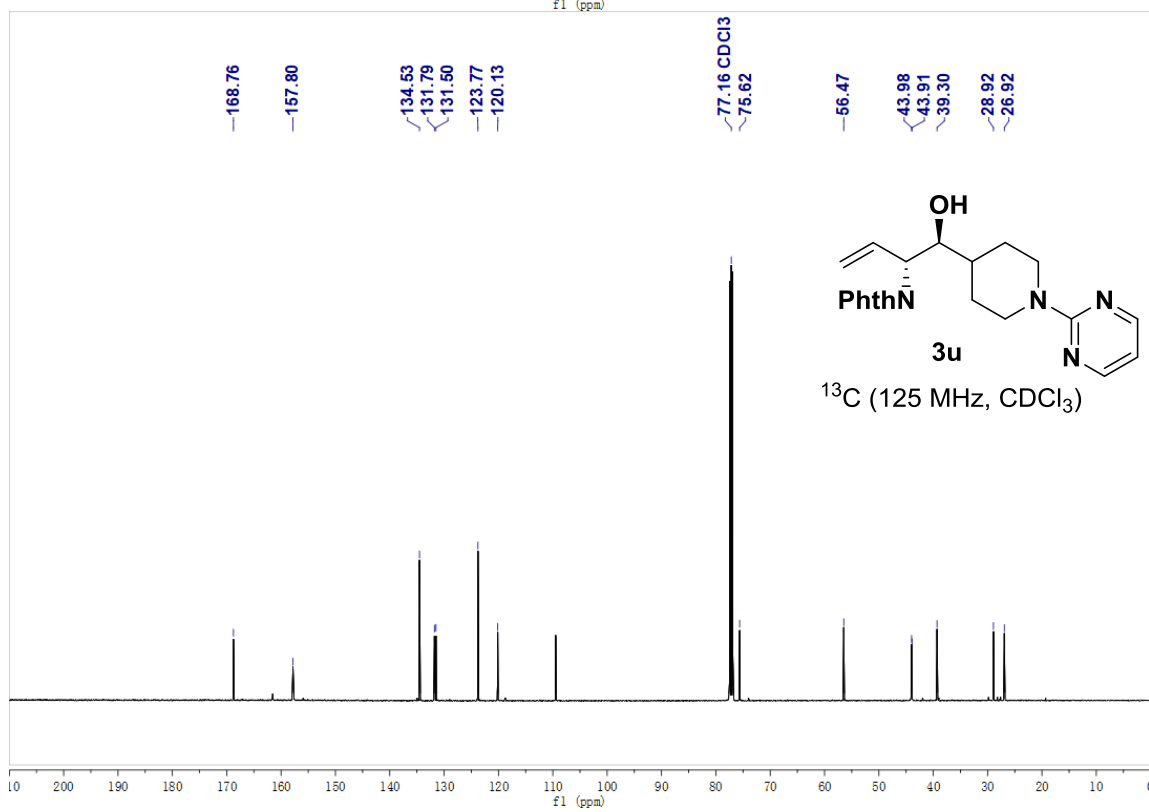

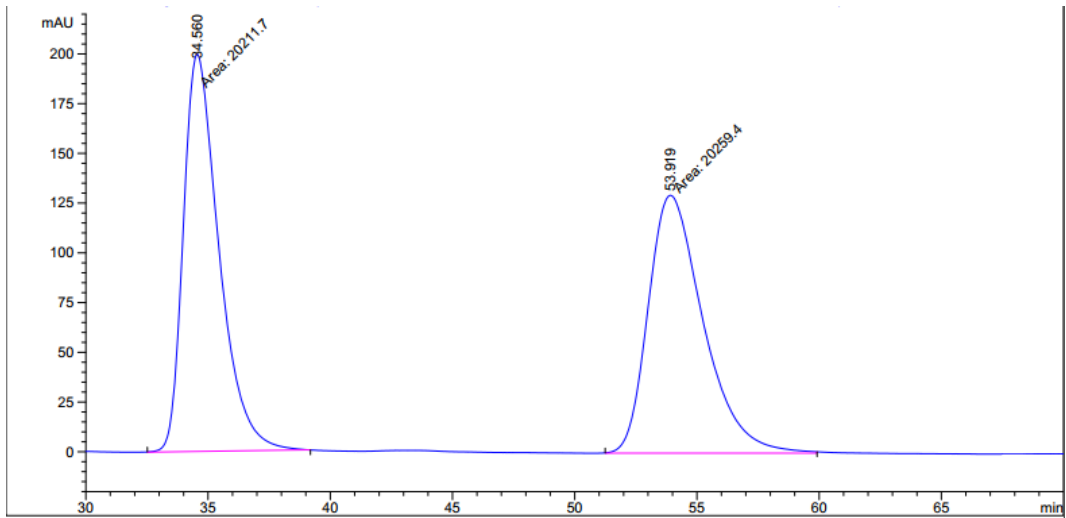

| Peak # | RetTime [min] | Type | Width [min] | Area [mAU*s] | Height [mAU] | Area %  |
|--------|---------------|------|-------------|--------------|--------------|---------|
| 1      | 34.560        | MM   | 1.6868      | 2.02117e4    | 199.70801    | 49.9411 |
| 2      | 53.919        | MM   | 2.6059      | 2.02594e4    | 129.57588    | 50.0589 |

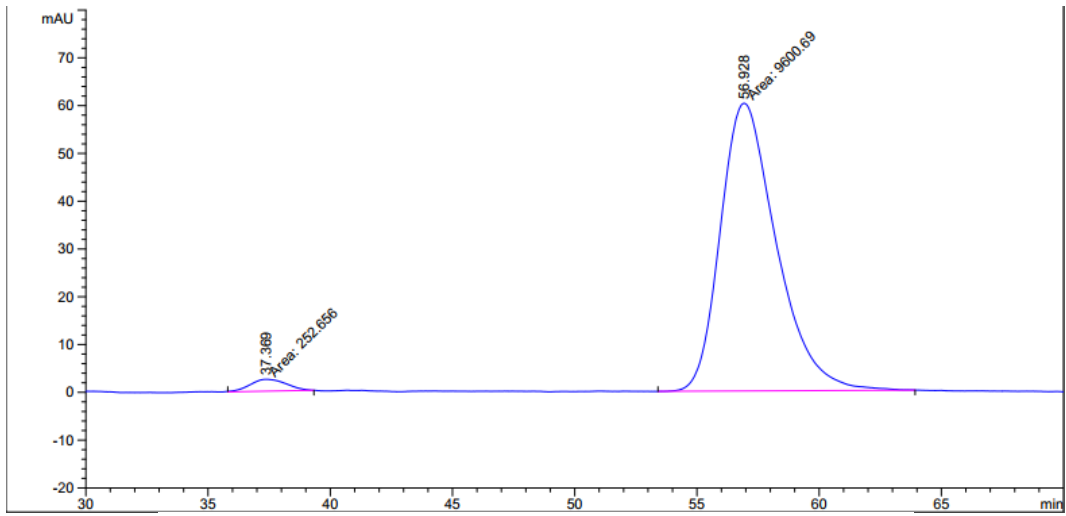

| Peak # | RetTime [min] | Type | Width [min] | Area [mAU*s] | Height [mAU] | Area %  |
|--------|---------------|------|-------------|--------------|--------------|---------|
| 1      | 37.369        | MM   | 1.7079      | 252.65567    | 2.46558      | 2.5642  |
| 2      | 56.928        | MM   | 2.6581      | 9600.69336   | 60.19681     | 97.4358 |

**2-((3*R*,4*S*)-4-hydroxy-6-methylhepta-1,5-dien-3-yl)isoindoline-1,3-dione (**3v**)**

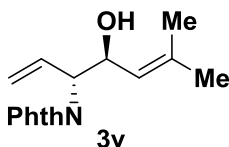

Alcohol **2v** (17.2 mg, 0.2 mmol) was subjected to standard reaction conditions (100 °C, 48 h). Upon flash column chromatography (SiO<sub>2</sub>, 20:80 EtOAc:hexanes), the title compound **3v** (38.0 mg, 0.14 mmol, >20:1 dr) was obtained as a light yellow solid in 70% yield.

**TLC** (SiO<sub>2</sub>) R<sub>f</sub> = 0.2 (20:80 EtOAc:hexanes)

**<sup>1</sup>H NMR** (500 MHz, CDCl<sub>3</sub>) δ: 7.83 (dd, *J* = 5.4, 3.1 Hz, 2H), 7.72 (dd, *J* = 5.5, 3.0 Hz, 2H), 6.38 (ddd, *J* = 17.2, 10.4, 7.8 Hz, 1H), 5.32 (ddd, *J* = 15.1, 10.6, 3.6 Hz, 2H), 5.22 – 5.13 (m, 1H), 4.91 (dd, *J* = 8.9, 6.8 Hz, 1H), 4.67 (dd, *J* = 7.7, 6.8 Hz, 1H), 1.61 (dd, *J* = 11.3, 0.9 Hz, 6H).

**<sup>13</sup>C NMR** (125 MHz, CDCl<sub>3</sub>) δ: 168.5, 138.5, 134.3, 132.1, 131.8, 124.0, 123.6, 120.4, 77.2, 68.8, 59.4, 25.9, 18.5.

**HRMS** (Na<sup>+</sup>, *m/z*) for C<sub>16</sub>H<sub>17</sub>NO<sub>3</sub>: calcd. = 294.1101; found = 294.1108.

**FTIR** (neat): 2988, 2358, 2340, 1769, 1703, 764, 733.

**HPLC**: (Chiralcel column OD-H, Hexane:2-PrOH = 95:5, 1.0 mL/min, 230 nm) ee = 86%.

[α]<sub>D</sub><sup>34</sup> = +46.3° (c = 0.62 CHCl<sub>3</sub>).

**MP** [78-82] °C

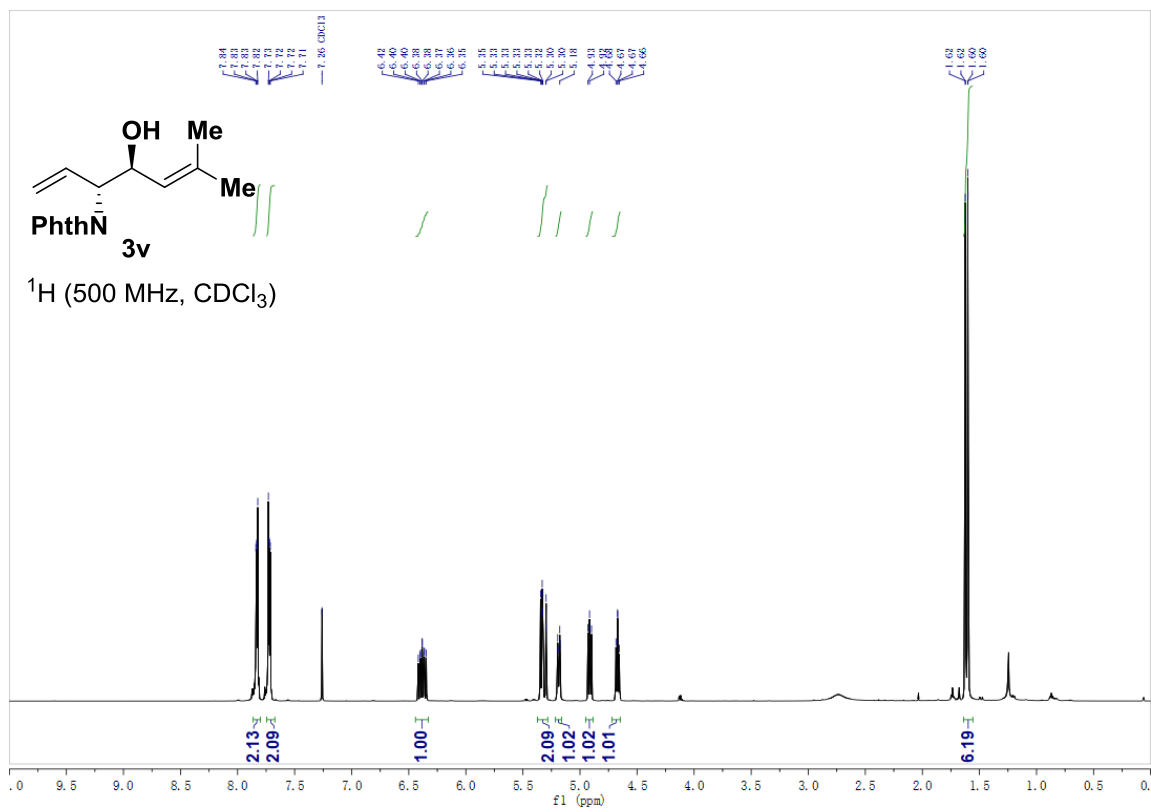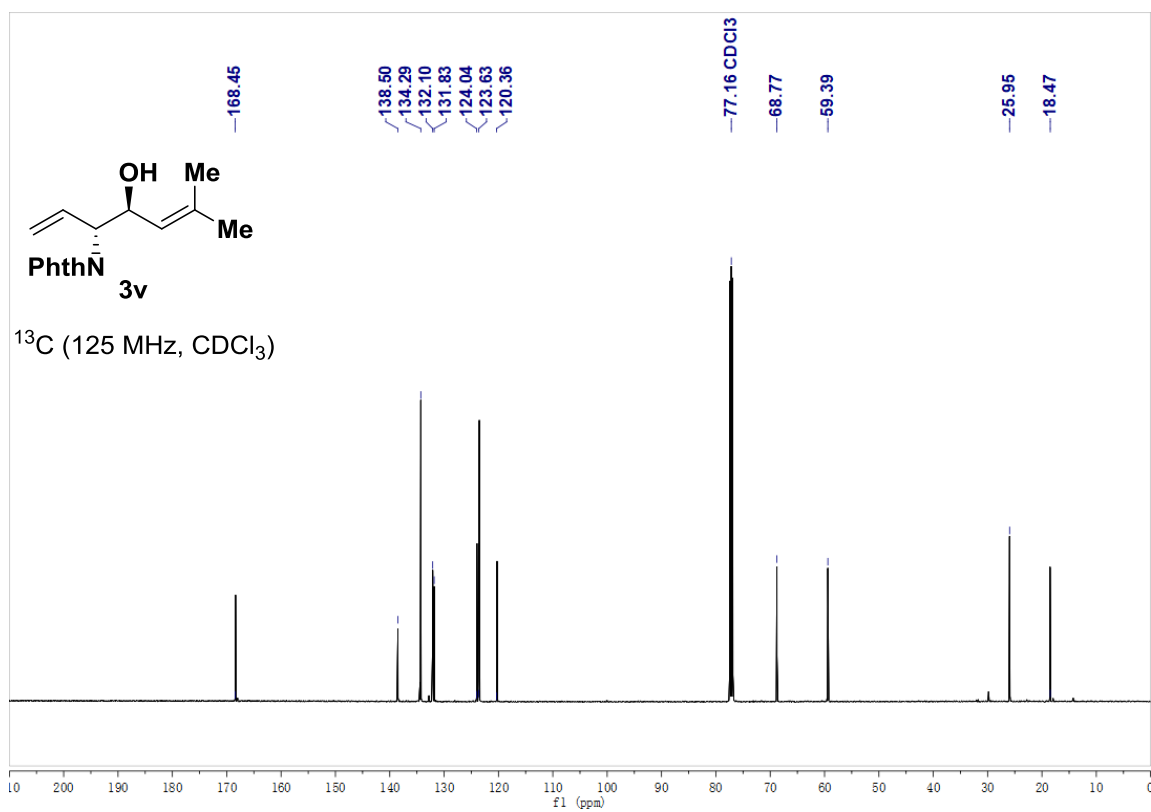



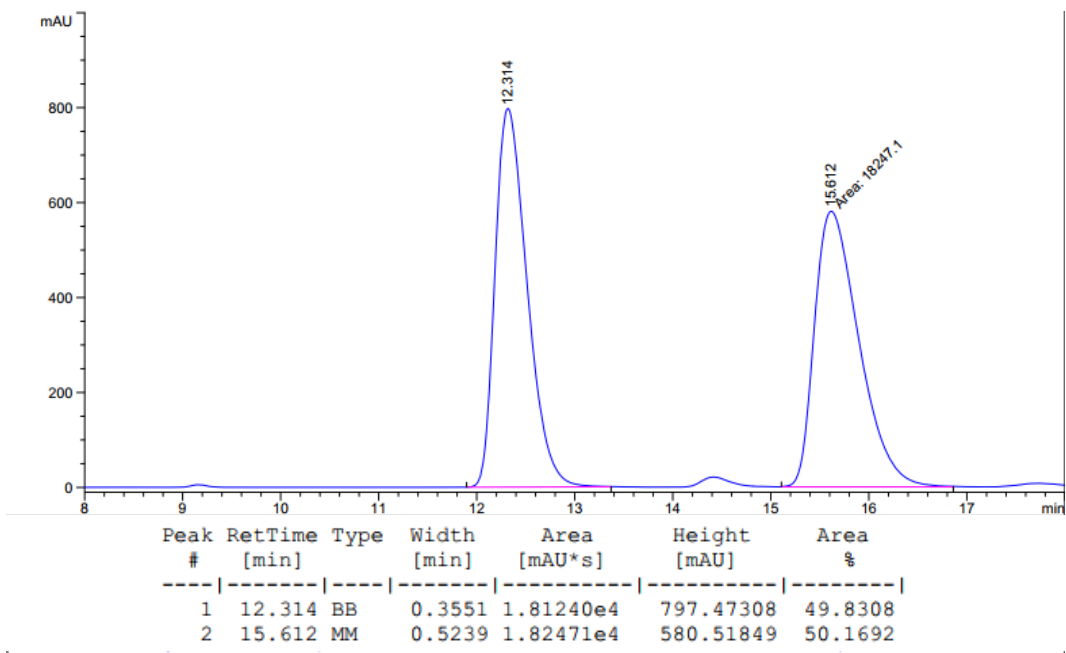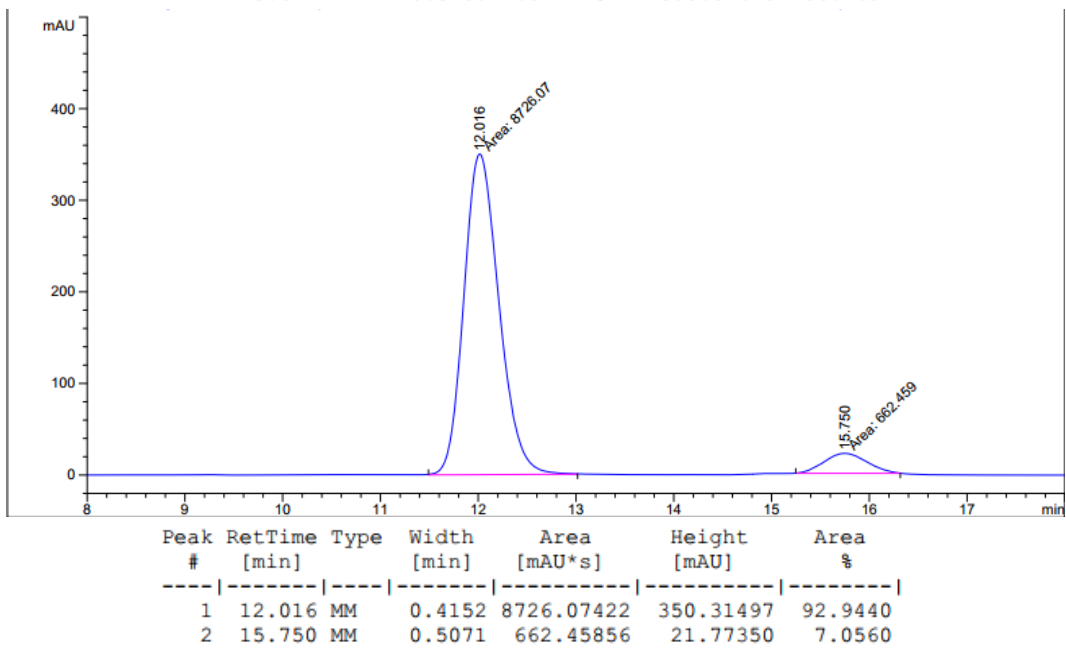

**2-((3*R*,4*S*,*E*)-7-(benzyloxy)-4-hydroxyhepta-1,5-dien-3-yl)isoindoline-1,3-dione (**3w**)**

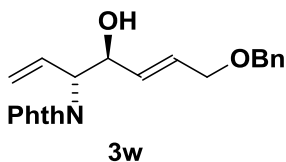

Alcohol **1w** (35.6 mg, 0.2 mmol) was subjected to standard reaction conditions (100 °C, 48 h). Upon flash column chromatography (SiO<sub>2</sub>, 20:80 EtOAc:hexanes), the title compound **3w** (50 mg, 0.138 mmol, >20:1 dr) was obtained as a light yellow oil in 69% yield.

**TLC** (SiO<sub>2</sub>) R<sub>f</sub> = 0.30 (30:80 EtOAc:hexanes)

**<sup>1</sup>H NMR** (500 MHz, CDCl<sub>3</sub>) δ: 7.87 (dd, *J* = 5.4, 3.1 Hz, 2H), 7.75 (dd, *J* = 5.5, 3.0 Hz, 2H), 7.36 – 7.29 (m, 3H), 7.27 – 7.24 (m, 2H), 6.36 (ddd, *J* = 17.5, 10.3, 7.3 Hz, 1H), 5.95 (dd, *J* = 13.3, 7.7 Hz, 1H), 5.81 (dd, *J* = 15.5, 6.6 Hz, 1H), 5.41 – 5.31 (m, 2H), 4.79 (dt, *J* = 23.1, 6.2 Hz, 2H), 4.40 (s, 2H), 4.00 (qd, *J* = 13.0, 5.6 Hz, 2H), 3.28 (s, 1H).

**<sup>13</sup>C NMR** (125 MHz, CDCl<sub>3</sub>) δ: 168.4, 138.2, 134.4, 131.7, 131.5, 131.4, 130.5, 128.4, 127.7, 127.7, 123.6, 120.1, 77.2, 72.3, 71.9, 69.8, 59.0.

**HRMS** (Na<sup>+</sup>, *m/z*) for C<sub>22</sub>H<sub>21</sub>NO<sub>4</sub>: calcd. = 386.1363; found = 386.1361.

**FTIR** (neat): 2988, 2358, 2340, 1769, 1703, 1383, 1264, 764.

**HPLC**: (Chiralcel column OJ-H, Hexane:2-PrOH = 95:5, 1.0 mL/min, 230 nm) ee = 86%.

[α]<sub>D</sub><sup>24</sup> = 75.2° (c = 0.37, CHCl<sub>3</sub>).

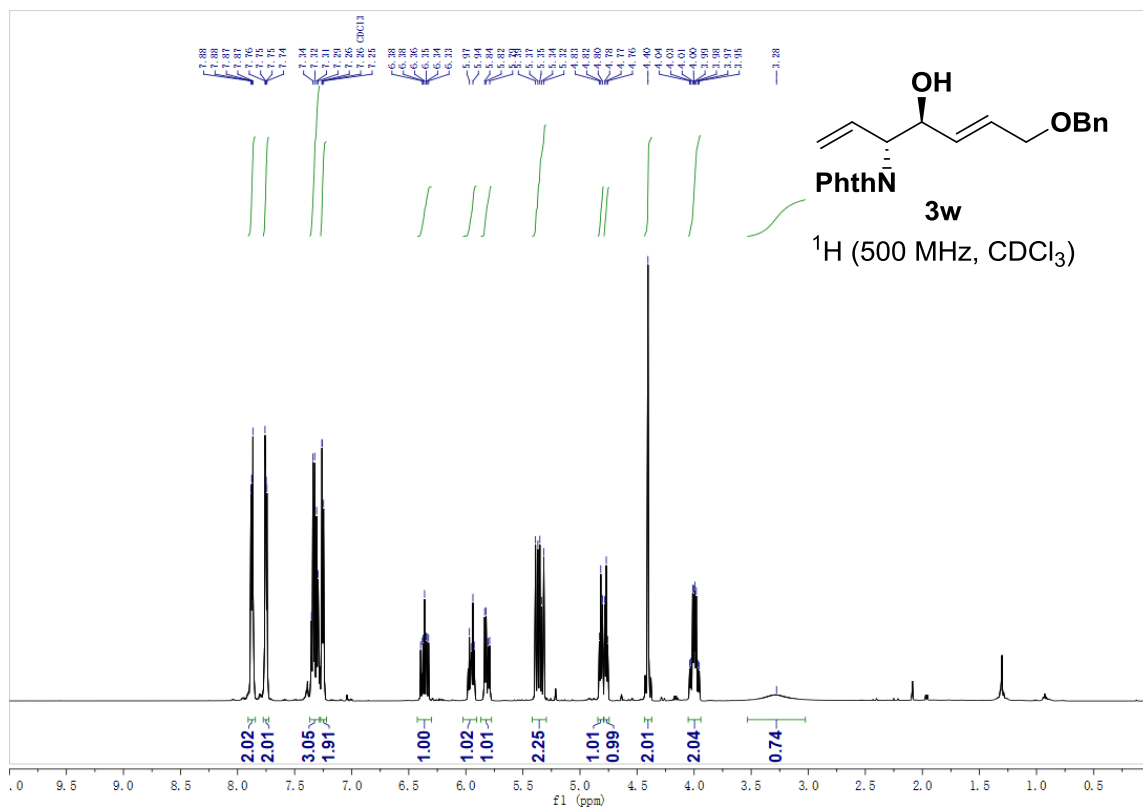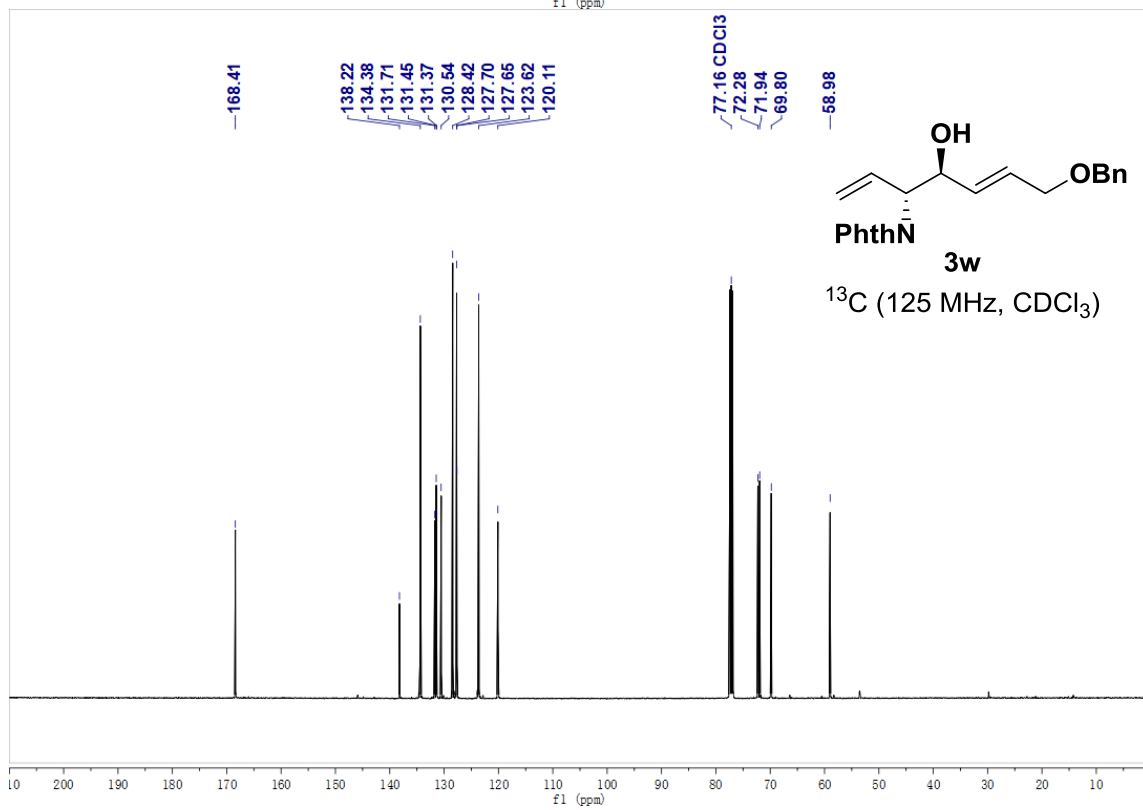

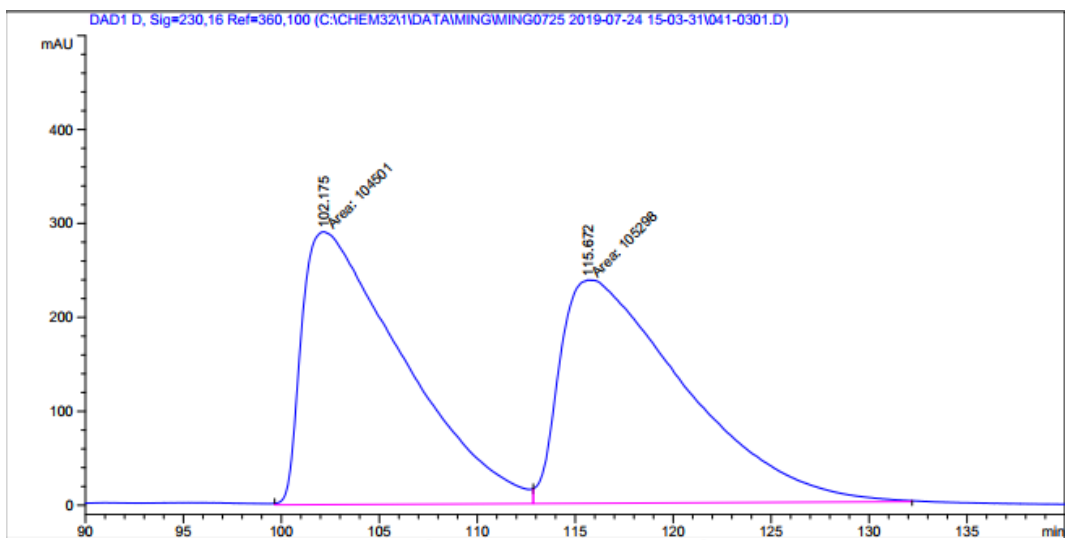

| Peak # | RetTime [min] | Type | Width [min] | Area [mAU*s] | Height [mAU] | Area %  |
|--------|---------------|------|-------------|--------------|--------------|---------|
| 1      | 102.175       | MF   | 5.9982      | 1.04501e5    | 290.36563    | 49.8101 |
| 2      | 115.672       | FM   | 7.3818      | 1.05298e5    | 237.74234    | 50.1899 |

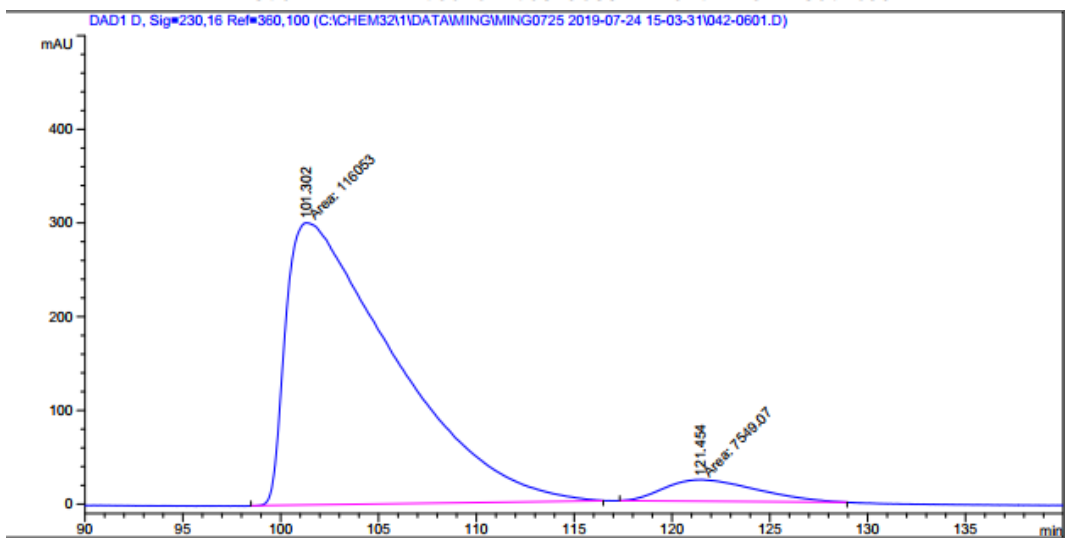

| Peak # | RetTime [min] | Type | Width [min] | Area [mAU*s] | Height [mAU] | Area %  |
|--------|---------------|------|-------------|--------------|--------------|---------|
| 1      | 101.302       | MM   | 6.4237      | 1.16053e5    | 301.10715    | 93.8924 |
| 2      | 121.454       | MM   | 5.4559      | 7549.06543   | 23.06065     | 6.1076  |

**2-((3*R*,4*S*,*E*)-7,7,7-trifluoro-4-hydroxyhepta-1,5-dien-3-yl)isoindoline-1,3-dione (**3x**)**

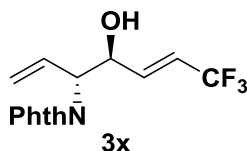

Alcohol **2x** (25.2 mg, 0.2 mmol) was subjected to standard reaction conditions (100 °C, 48 h) using 7.5 mol% of (R)-Ir-**VI**. Upon flash column chromatography (SiO<sub>2</sub>, 20:80 EtOAc:hexanes), the title compound **3x** (38.1 mg, 0.12 mmol, >20:1 dr) was obtained as a light yellow solid in 61% yield.

**TLC** (SiO<sub>2</sub>) R<sub>f</sub> = 0.40 (20:80 EtOAc:hexanes)

**<sup>1</sup>H NMR** (500 MHz, CDCl<sub>3</sub>) δ: 7.86 (dd, *J* = 5.4, 3.1 Hz, 2H), 7.78 (dd, *J* = 5.5, 3.0 Hz, 2H), 6.41 (ddq, *J* = 15.6, 4.3, 2.2 Hz, 1H), 6.17 (ddd, *J* = 17.0, 10.4, 6.7 Hz, 1H), 6.11 – 6.04 (m, 1H), 5.35 (d, *J* = 10.7 Hz, 1H), 5.23 (d, *J* = 17.0 Hz, 1H), 4.86 – 4.84 (m, 1H), 4.78 – 4.76 (m, 1H), 4.15 (brs, 1H).

**<sup>13</sup>C NMR** (125 MHz, CDCl<sub>3</sub>) δ: 168.7, 138.0 (q, *J* = 6.3 Hz), 134.8, 131.6, 129.6, 124.0, 123.0 (q, *J* = 270 Hz), 120.9 (q, *J* = 121 Hz), 120.6, 71.2, 58.3.

**<sup>19</sup>F NMR** (470 MHz, CDCl<sub>3</sub>) δ: -64.4 (dt, *J* = 6.8, 2.6 Hz).

**HRMS** (Na<sup>+</sup>, *m/z*) for C<sub>15</sub>H<sub>12</sub>F<sub>3</sub>NO<sub>3</sub>: calcd. = 334.0665; found = 334.0661.

**FTIR** (neat): 3456, 3333, 2359, 1687, 1330, 1077, 712.

**HPLC**: (Chiralcel column AS-H, Hexane:2-PrOH = 95:5, 1.0 mL/min, 230 nm) ee = 90%.

**[α]<sub>D</sub><sup>34</sup>** = +38.6° (*c* = 1.18, CHCl<sub>3</sub>).

**MP** [109 – 112] °C

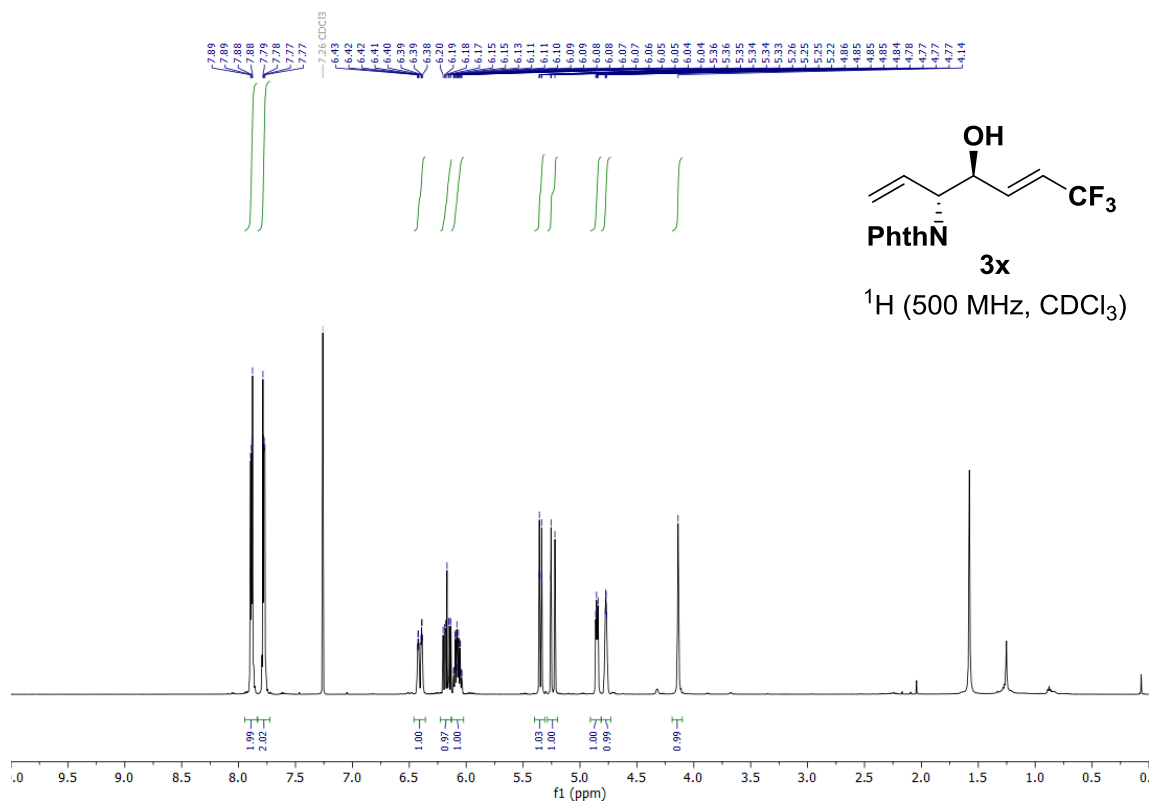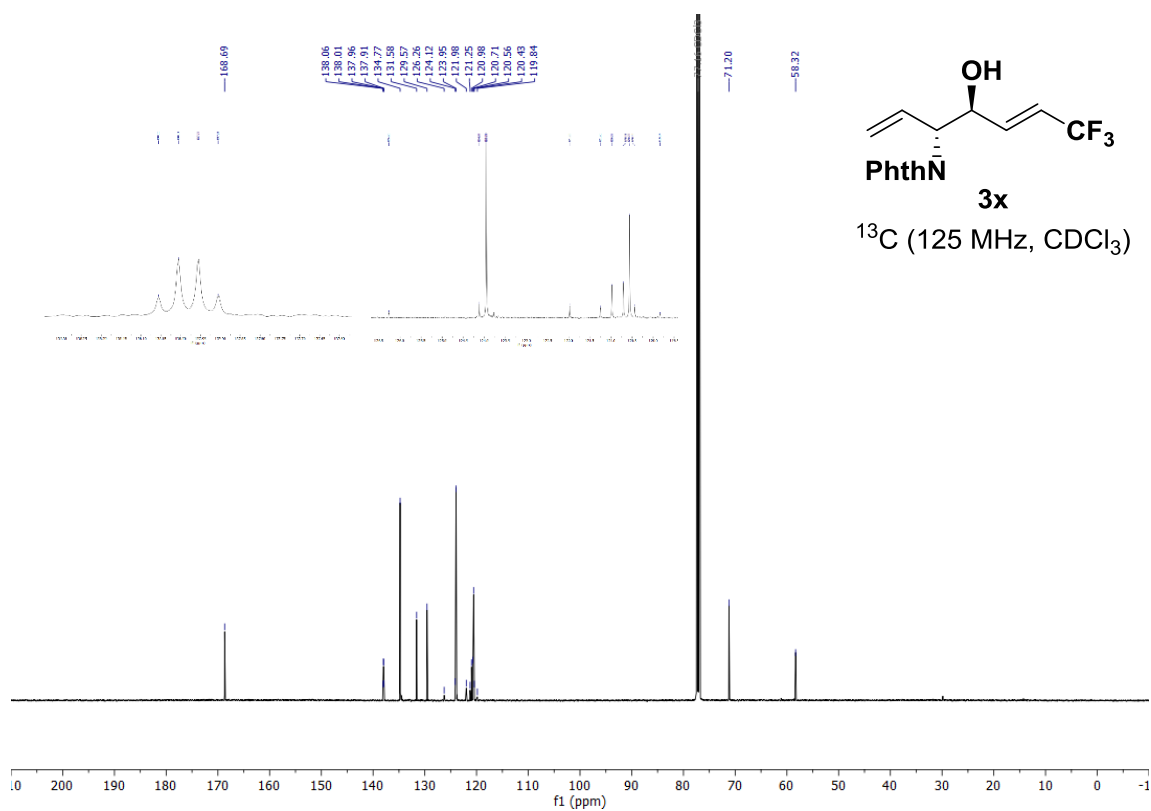

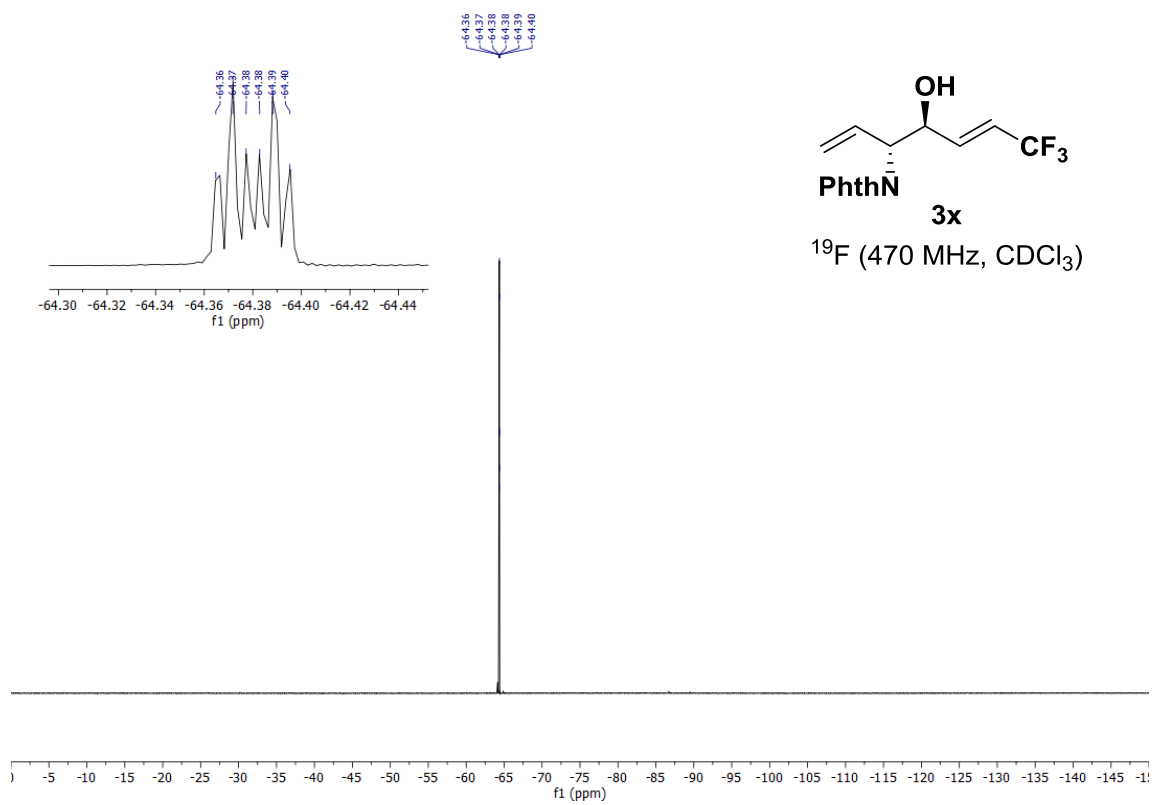

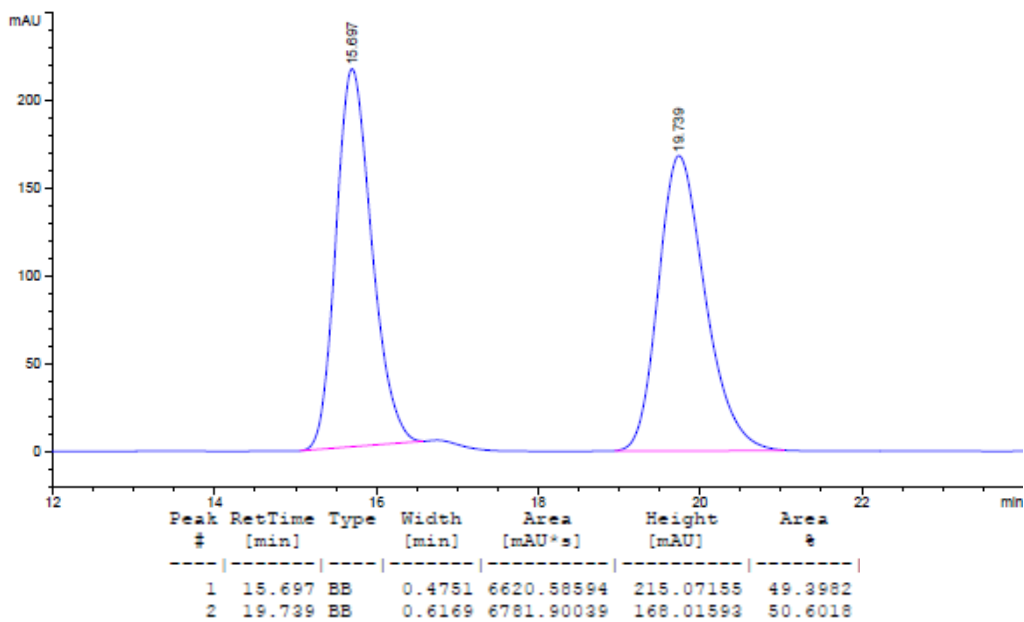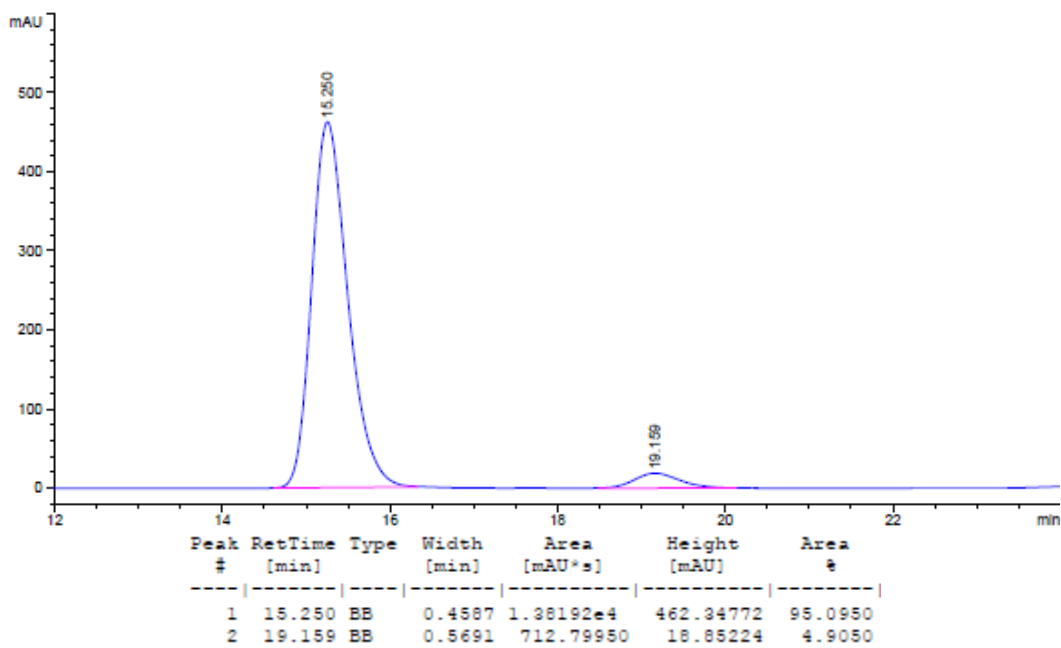



**2-((3*R*,4*S*,*E*)-4-hydroxy-6-phenylhexa-1,5-dien-3-yl)isoindoline-1,3-dione (**3y**)**

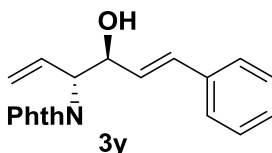

Alcohol **1y** (27 mg, 0.2 mmol) was subjected to standard reaction conditions (100 °C, 48 h). Upon flash column chromatography (SiO<sub>2</sub>, 20:80 EtOAc:hexanes), the title compound **3y** (45 mg, 0.14 mmol, >20:1 dr) was obtained as a light yellow oil in 71% yield.

**TLC** (SiO<sub>2</sub>) R<sub>f</sub> = 0.35 (20:80 EtOAc:hexanes)

**<sup>1</sup>H NMR** (500 MHz, CDCl<sub>3</sub>) δ: 7.84 (dd, *J* = 5.4, 3.1 Hz, 2H), 7.72 (dd, *J* = 5.5, 3.0 Hz, 2H), 7.32 – 7.29 (m, 5H), 6.69 (d, *J* = 15.8 Hz, 1H), 6.36 (ddd, *J* = 17.0, 10.4, 6.7 Hz, 1H), 6.20 (dd, *J* = 15.9, 6.2 Hz, 1H), 5.35 (d, *J* = 10.7 Hz, 1H), 5.31 (d, *J* = 17.0 Hz, 1H), 4.89 – 4.84 (m, 2H), 3.34 (s, 1H).

**<sup>13</sup>C NMR** (125 MHz, CDCl<sub>3</sub>) δ: 168.6, 136.5, 134.5, 133.2, 131.8, 131.3, 128.7, 128.1, 128.0, 126.8, 123.7, 120.2, 73.1, 59.2.

**HRMS** (Na<sup>+</sup>, *m/z*) for C<sub>20</sub>H<sub>17</sub>NO<sub>3</sub>: calcd. = 342.1101; found = 342.1106.

**FTIR** (neat): 3456, 3333, 2359, 1687, 1330, 1077, 712.

**HPLC**: (Chiralcel column OD-H, Hexane:2-PrOH = 95:5, 1.0 mL/min, 230 nm) ee = 86%.

[α]<sub>D</sub><sup>24</sup> = -7.9° (c = 0.95, CHCl<sub>3</sub>).

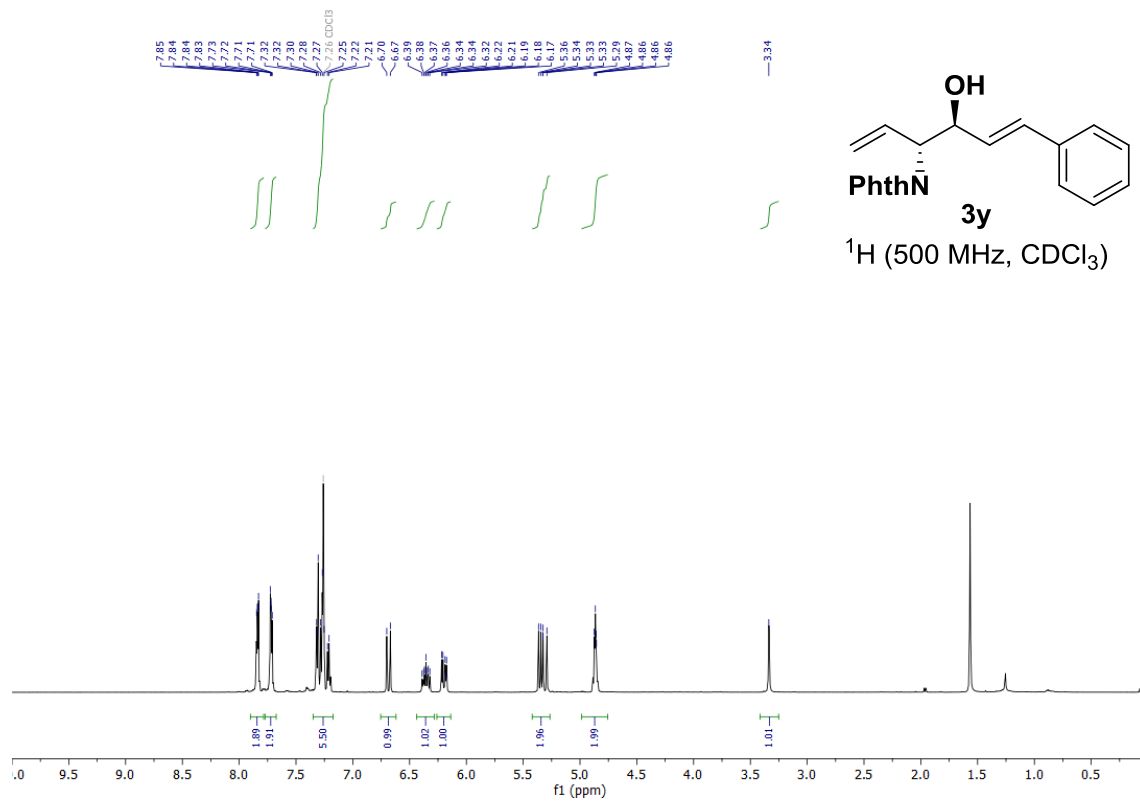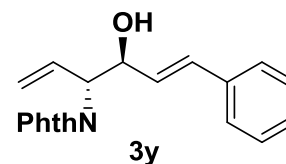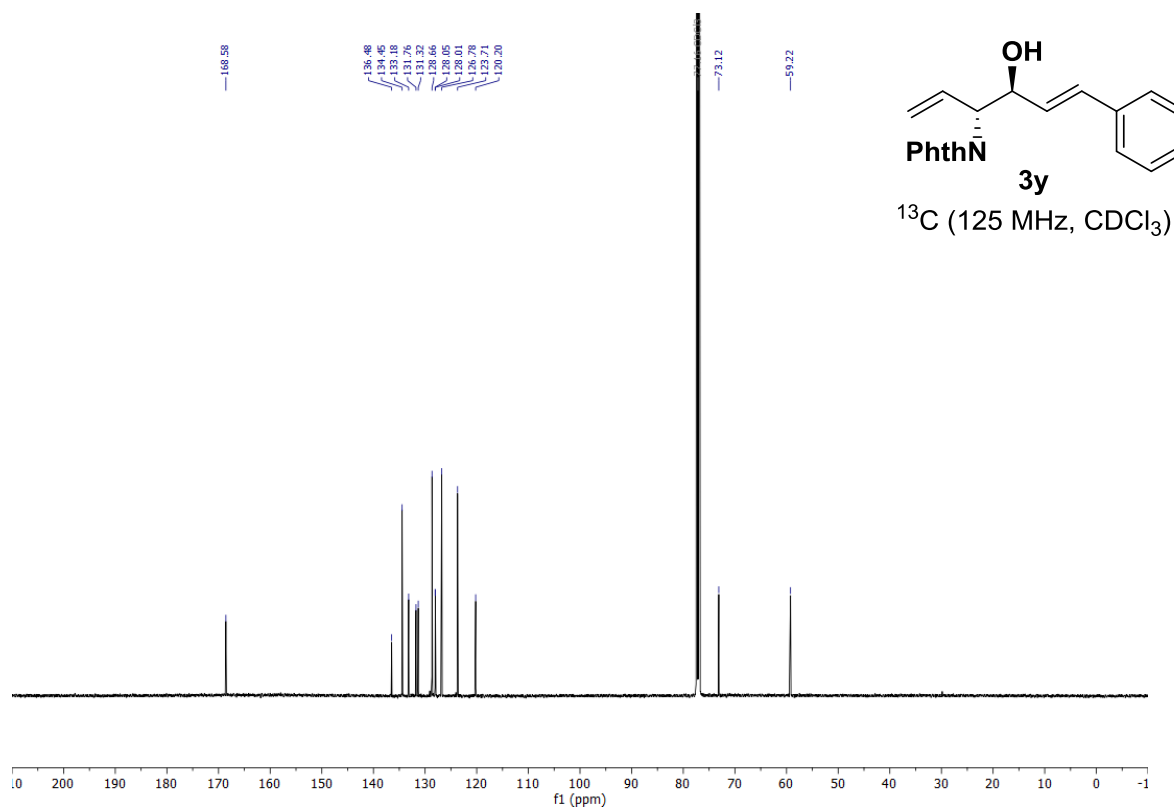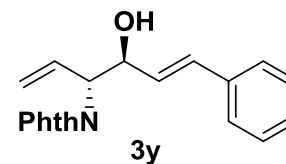

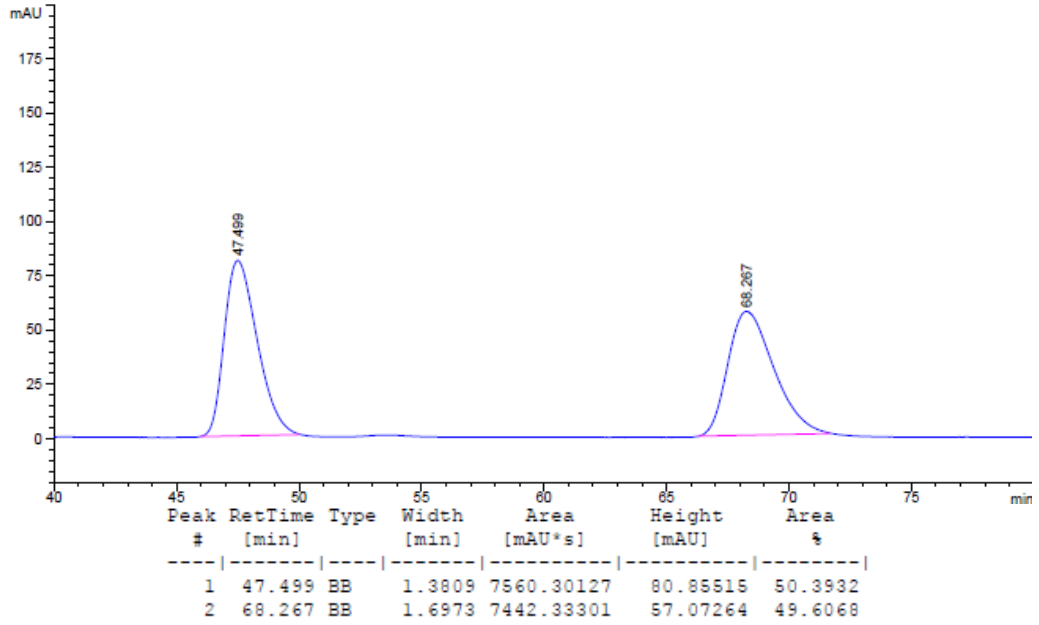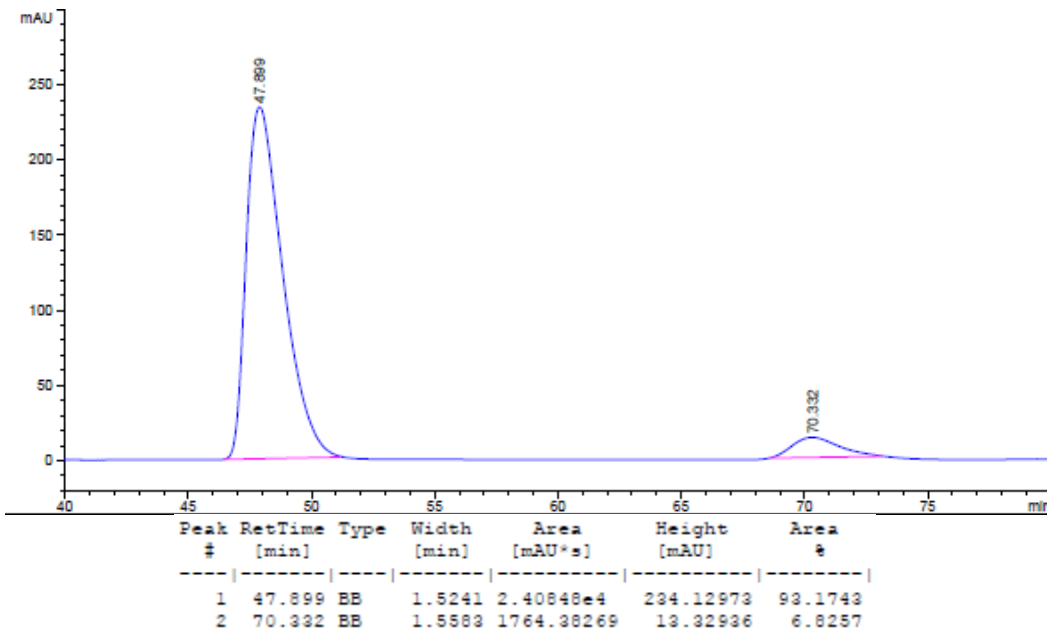

**2-((3*R*,4*S*,6*S*)-4-hydroxy-6,10-dimethylundeca-1,9-dien-3-yl)isoindoline-1,3-dione (**3z**)**

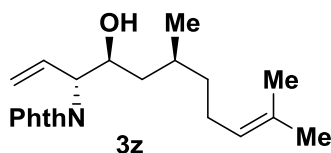

Alcohol **1z** (31.2 mg, 0.2 mmol) was subjected to standard reaction conditions (100 °C, 48 h). Upon flash column chromatography (SiO<sub>2</sub>, 10:90 EtOAc:hexanes), the title compound **3z** (41.7 mg, 0.12 mmol, 10:1 dr) was obtained as a pale yellow oil in 62% yield.

**TLC** (SiO<sub>2</sub>) R<sub>f</sub> = 0.47 (20:80 EtOAc:hexanes)

**<sup>1</sup>H NMR** (500 MHz, CDCl<sub>3</sub>) δ: 7.86 (dd, *J* = 5.4, 3.1 Hz, 2H), 7.75 (dd, *J* = 5.5, 3.0 Hz, 2H), 6.28 (ddd, *J* = 17.6, 10.4, 7.8 Hz, 1H), 5.32 (d, *J* = 10.7 Hz, 1H), 5.26 (d, *J* = 17.3 Hz, 1H), 5.08 (t, *J* = 7.0 Hz, 1H), 4.68 (dd, *J* = 7.8, 3.4 Hz, 1H), 4.15 (ddd, *J* = 8.6, 5.2, 3.5 Hz, 1H), 3.67 (brs, 1H), 2.04 – 1.88 (m, 1H), 1.73 – 1.66 (m, 1H), 1.66 (s, 3H), 1.58 (s, 3H), 1.50 – 1.39 (m, 3H), 1.15 – 1.07 (m, 1H), 0.92 (d, *J* = 6.7 Hz, 3H).

**<sup>13</sup>C NMR** (125 MHz, CDCl<sub>3</sub>) δ: 168.9, 134.5, 131.8, 131.4, 131.1, 124.9, 123.7, 120.1, 70.6, 59.6, 41.6, 36.4, 29.3, 25.9, 25.5, 20.4, 17.8.

**HRMS** (Na<sup>+</sup>, *m/z*) for C<sub>21</sub>H<sub>27</sub>NO<sub>3</sub>: calcd. = 364.1883; found = 364.1882.

**FTIR** (neat): 3466, 2921, 1704, 1380, 1065, 719.

[α]<sub>D</sub><sup>34</sup> = +39.5° (c = 1.37, CHCl<sub>3</sub>).

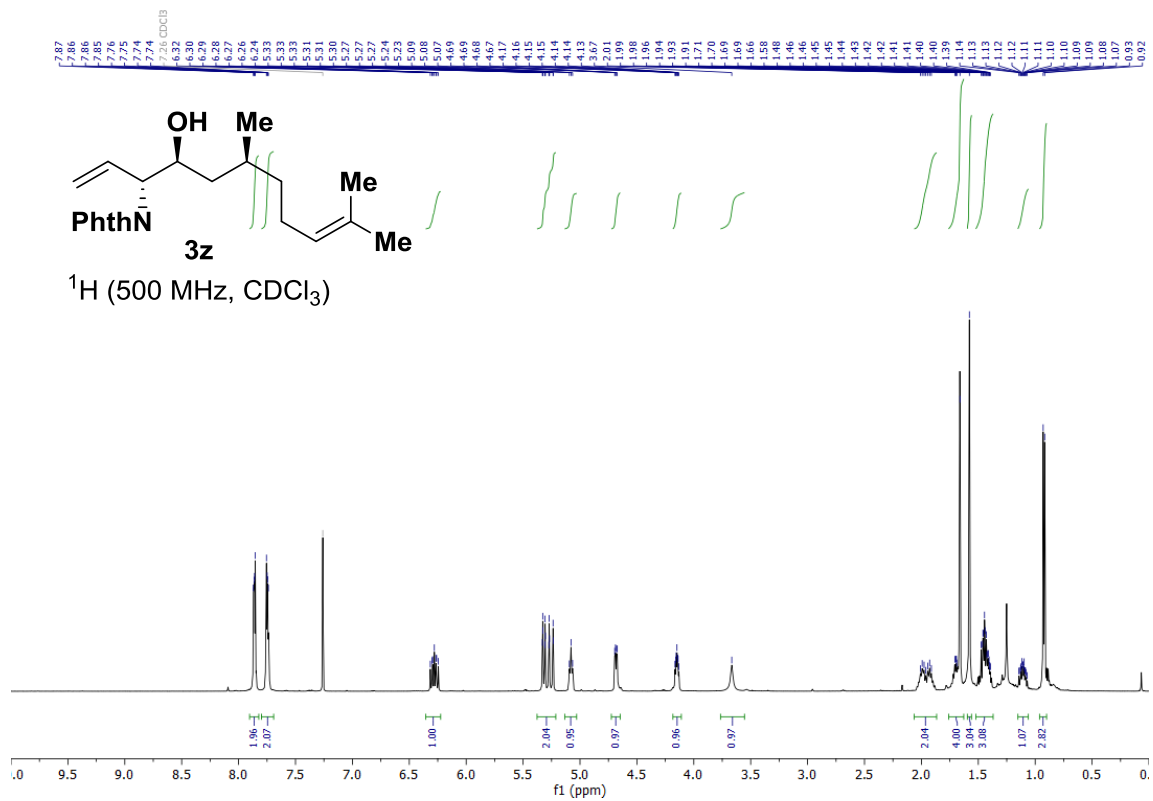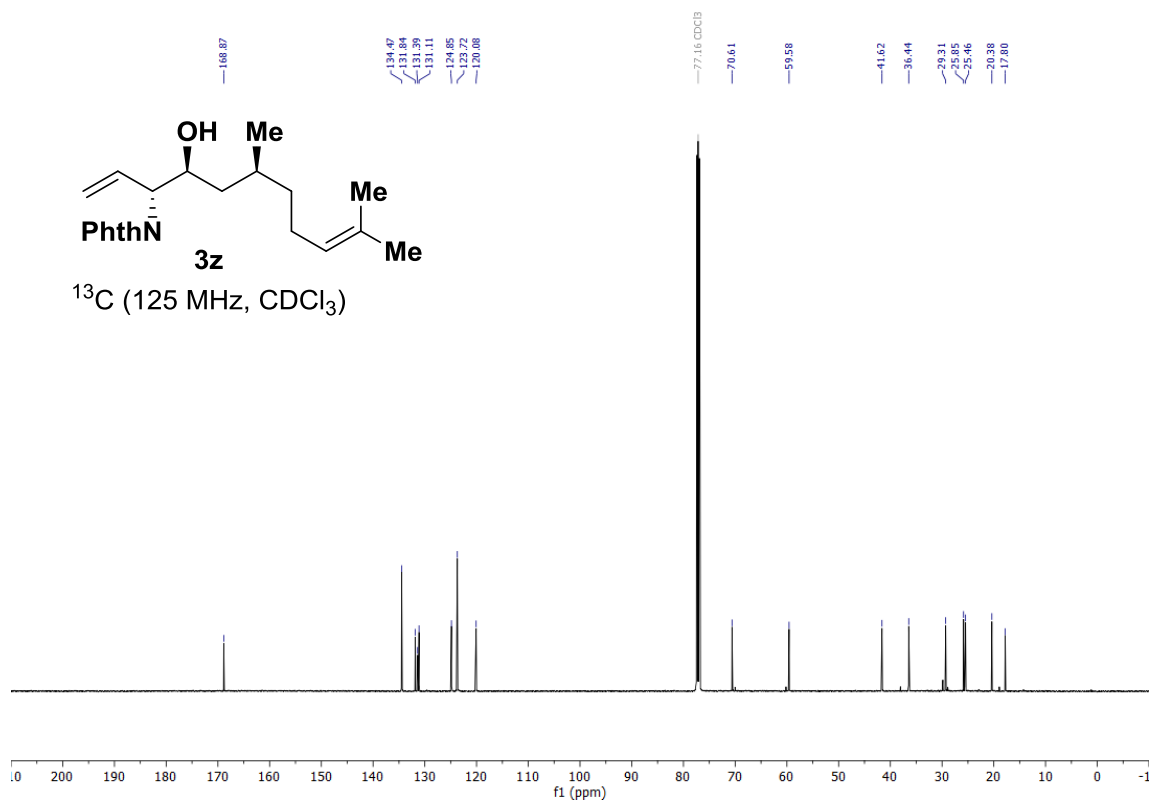

**2-((3*S*,4*R*,6*S*)-4-hydroxy-6,10-dimethylundeca-1,9-dien-3-yl)isoindoline-1,3-dione (**3a'**)**

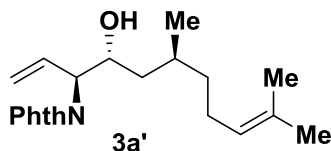

Alcohol **2a'** (31.2 mg, 0.2 mmol) was subjected to standard reaction conditions (100 °C, 48 h) using 5 mol% of (*S*)-Ir-IV. Upon flash column chromatography (SiO<sub>2</sub>, 10:90 EtOAc:hexanes), the title compound **3a'** (43.1 mg, 0.13 mmol, 13:1 dr) was obtained as a pale yellow oil in 64% yield.

**TLC** (SiO<sub>2</sub>) R<sub>f</sub> = 0.47 (20:80 EtOAc:hexanes)

**<sup>1</sup>H NMR** (500 MHz, CDCl<sub>3</sub>) δ: 7.86 (dd, *J* = 5.4, 3.1 Hz, 2H), 7.75 (dd, *J* = 5.5, 3.0 Hz, 2H), 6.28 (ddd, *J* = 17.6, 10.4, 7.8 Hz, 1H), 5.32 (d, *J* = 10.7 Hz, 1H), 5.27 (d, *J* = 17.3 Hz, 1H), 5.08 (t, *J* = 7.1 Hz, 1H), 4.65 (dd, *J* = 7.8, 3.9 Hz, 1H), 4.18 (ddd, *J* = 10.3, 3.7 Hz, 1H), 3.54 (brs, 1H), 2.03 – 1.93 (m, 2H), 1.77 – 1.72 (m, 1H), 1.66 (s, 3H), 1.58 (brs, 4H), 1.34 – 1.28 (m, 1H), 1.21 – 1.14 (m, 2H), 0.90 (d, *J* = 6.7 Hz, 3H).

**<sup>13</sup>C NMR** (125 MHz, CDCl<sub>3</sub>) δ: 168.8, 134.5, 131.9, 131.4, 131.4, 124.9, 123.7, 120.1, 70.0, 60.2, 41.7, 38.0, 27.9, 25.9, 25.6, 18.9, 17.8.

**HRMS** (Na<sup>+</sup>, *m/z*) for C<sub>21</sub>H<sub>27</sub>NO<sub>3</sub>: calcd. = 364.1883; found = 364.1883.

**FTIR** (neat): 3454, 2923, 1703, 1381, 1066, 719.

[α]<sub>D</sub><sup>34</sup> = –18.2° (c = 1.44, CHCl<sub>3</sub>).

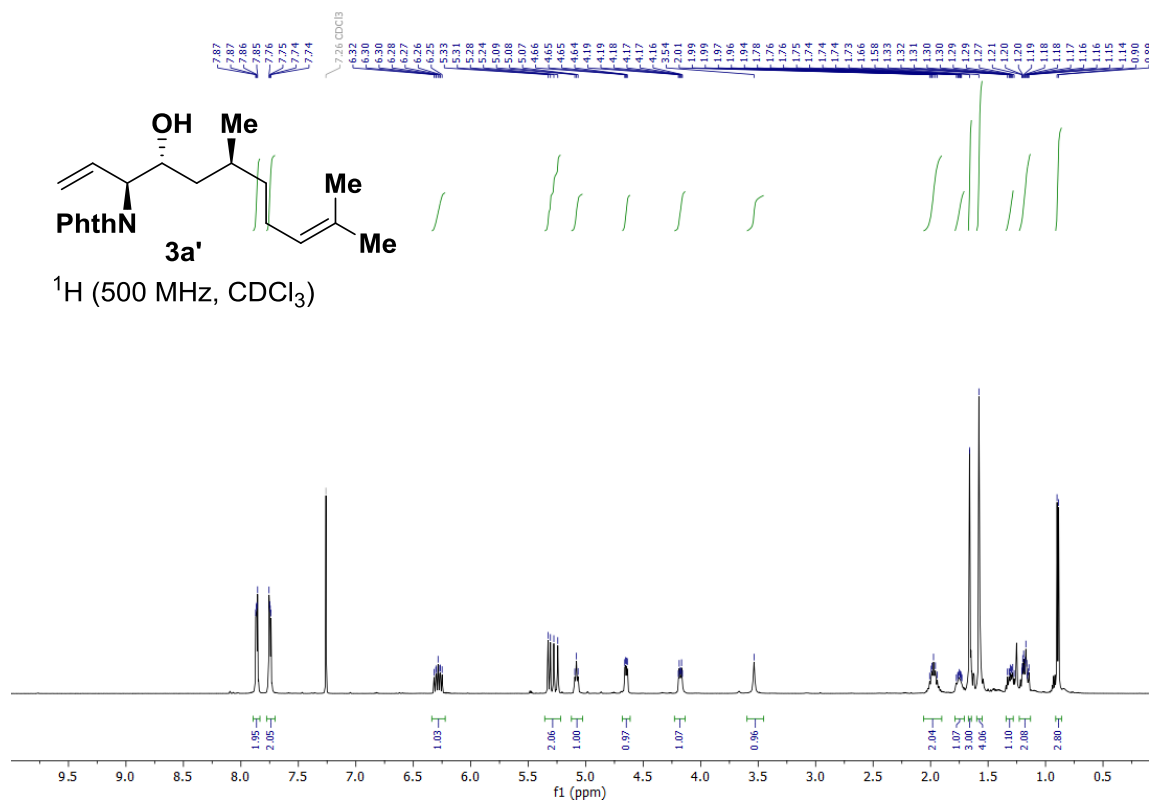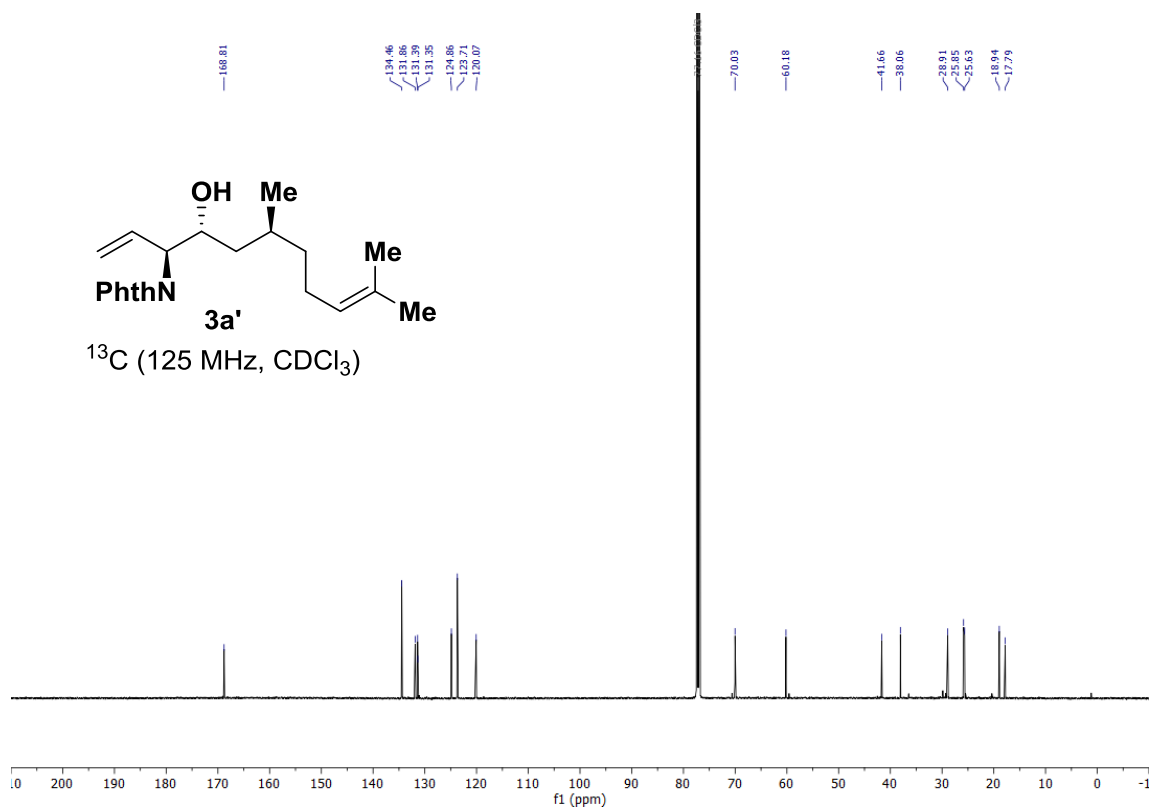

**2-((3*R*,4*S*,6*R*)-4,6-dihydroxyhept-1-en-3-yl)isoindoline-1,3-dione (**3b'**)**

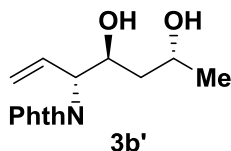

Alcohol **2b'** (18.0 mg, 0.2 mmol) was subjected to standard reaction conditions (100 °C, 48 h) using 7.5 mol% of (*R*)-**Ir-VI**. Upon flash column chromatography (SiO<sub>2</sub>, 50:50 EtOAc:hexanes), the title compound **3b'** (39.6 mg, 0.14 mmol, 20:1 dr) was obtained as a white solid in 72% yield.

**TLC** (SiO<sub>2</sub>) R<sub>f</sub> = 0.38 (50:50 EtOAc:hexanes)

**<sup>1</sup>H NMR** (500 MHz, CDCl<sub>3</sub>) δ: 7.86 (dd, *J* = 5.4, 3.1 Hz, 2H), 7.76 (dd, *J* = 5.5, 3.0 Hz, 2H), 6.30 (ddd, *J* = 17.6, 10.4, 7.7 Hz, 1H), 5.33 (d, *J* = 10.7 Hz, 1H), 5.29 (d, *J* = 17.3 Hz, 1H), 4.71 (dd, *J* = 7.8, 4.4 Hz, 1H), 4.44 (dt, *J* = 9.8, 3.4 Hz, 1H), 4.20 – 4.13 (m, 1H), 1.77 (ddd, *J* = 14.3, 9.6, 2.9 Hz, 1H), 1.77 (ddd, *J* = 14.3, 8.4, 3.1 Hz, 1H), 1.23 (d, *J* = 6.3 Hz, 3H).

**<sup>13</sup>C NMR** (125 MHz, CDCl<sub>3</sub>) δ: 168.7, 134.5, 131.8, 131.3, 123.8, 120.3, 69.6, 65.2, 59.5, 41.7, 23.7.

**HRMS** (Na<sup>+</sup>, *m/z*) for C<sub>15</sub>H<sub>17</sub>NO<sub>4</sub>: calcd. = 298.1050; found = 298.1054.

**FTIR** (neat): 3457, 3378, 2963, 2359, 1693, 1386, 988, 890, 711.

[α]<sub>D</sub><sup>34</sup> = +56.9° (c = 1.30, CHCl<sub>3</sub>).

**MP** [123 – 127] °C



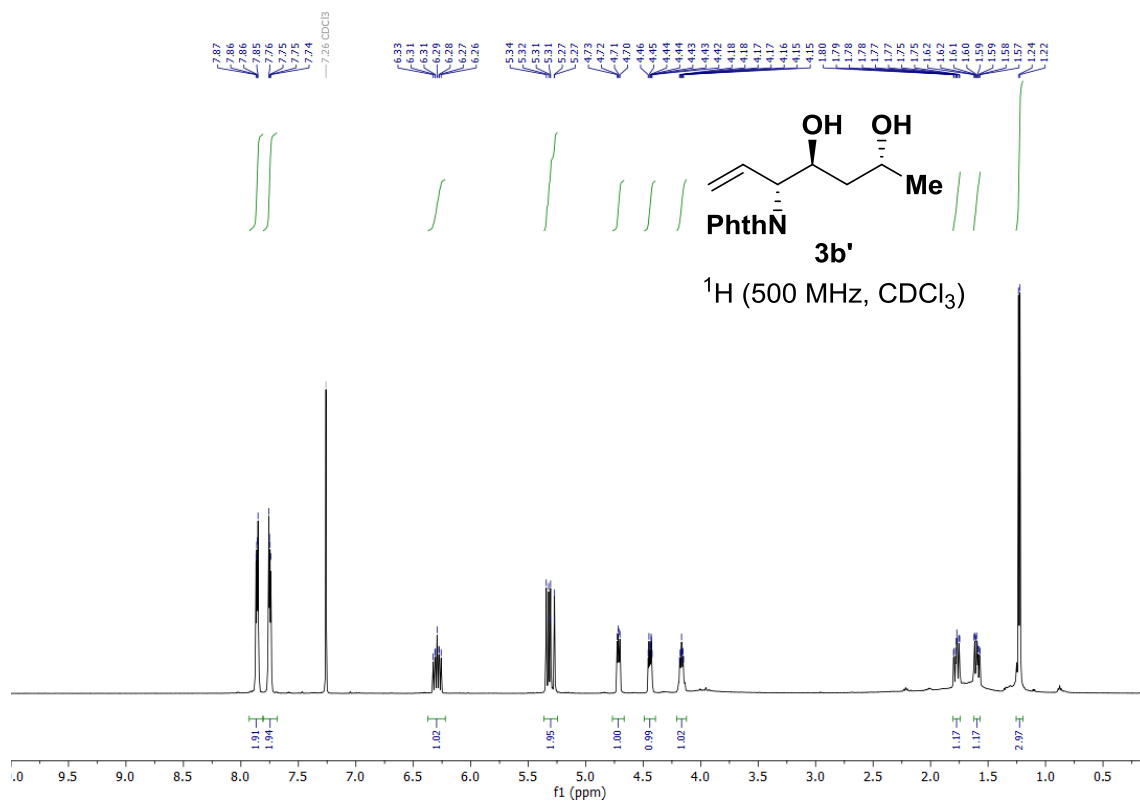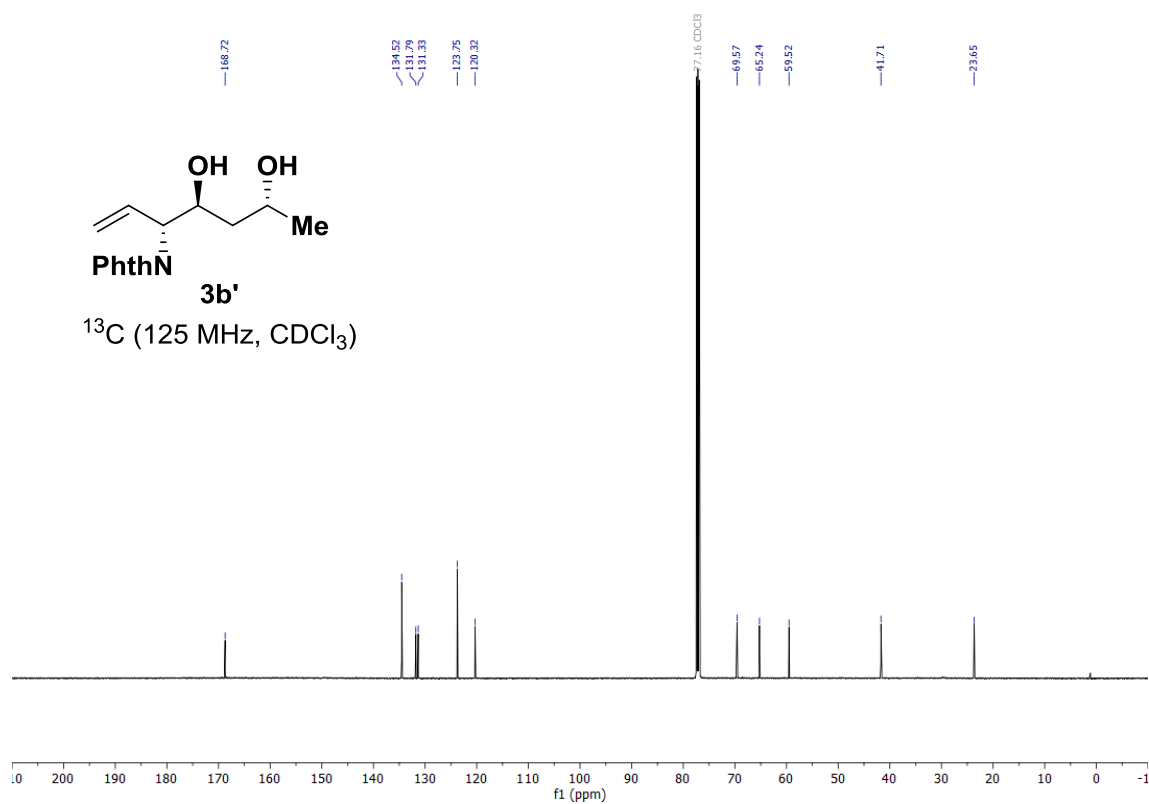

**2-((3*S*,4*R*,6*R*)-4,6-dihydroxyhept-1-en-3-yl)isoindoline-1,3-dione (**3c'**)**

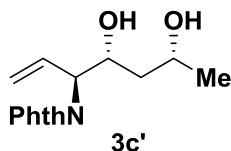

Alcohol **2c'** (18 mg, 0.2 mmol) was subjected to standard reaction conditions (100 °C, 48 h) using 7.5 mol% of (*S*)-Ir-IV. Upon flash column chromatography (SiO<sub>2</sub>, 50:50 EtOAc:hexanes), the title compound **3c'** (36.3 mg, 0.13 mmol, 20:1 dr) was obtained as a white solid in 66% yield.

**TLC** (SiO<sub>2</sub>) R<sub>f</sub> = 0.38 (50:50 EtOAc:hexanes)

**<sup>1</sup>H NMR** (500 MHz, CDCl<sub>3</sub>) δ: 7.86 (dd, *J* = 5.4, 3.1 Hz, 2H), 7.75 (dd, *J* = 5.5, 3.0 Hz, 2H), 6.27 (ddd, *J* = 17.6, 10.4, 7.7 Hz, 1H), 5.34 (d, *J* = 10.7 Hz, 1H), 5.28 (d, *J* = 17.3 Hz, 1H), 4.67 (dd, *J* = 7.8, 3.8 Hz, 1H), 4.35 (dt, *J* = 10.9, 3.1 Hz, 1H), 4.10 – 4.03 (m, 1H), 1.72 (ddd, *J* = 14.2, 10.8, 9.4 Hz, 1H), 1.77 (dt, *J* = 14.2, 2.5 Hz, 1H), 1.19 (d, *J* = 6.3 Hz, 3H).

**<sup>13</sup>C NMR** (125 MHz, CDCl<sub>3</sub>) δ: 168.8, 134.6, 131.8, 130.9, 123.8, 120.4, 73.4, 68.2, 59.8, 42.0, 23.8.

**HRMS** (Na<sup>+</sup>, *m/z*) for C<sub>15</sub>H<sub>17</sub>NO<sub>4</sub>: calcd. = 298.1050; found = 298.1053.

**FTIR** (neat): 3197, 2966, 2360, 1699, 1381, 1323, 1073, 713.

$[\alpha]_D^{34} = -76.1^\circ$  (*c* = 0.90, CHCl<sub>3</sub>).

**MP** [108 – 111] °C

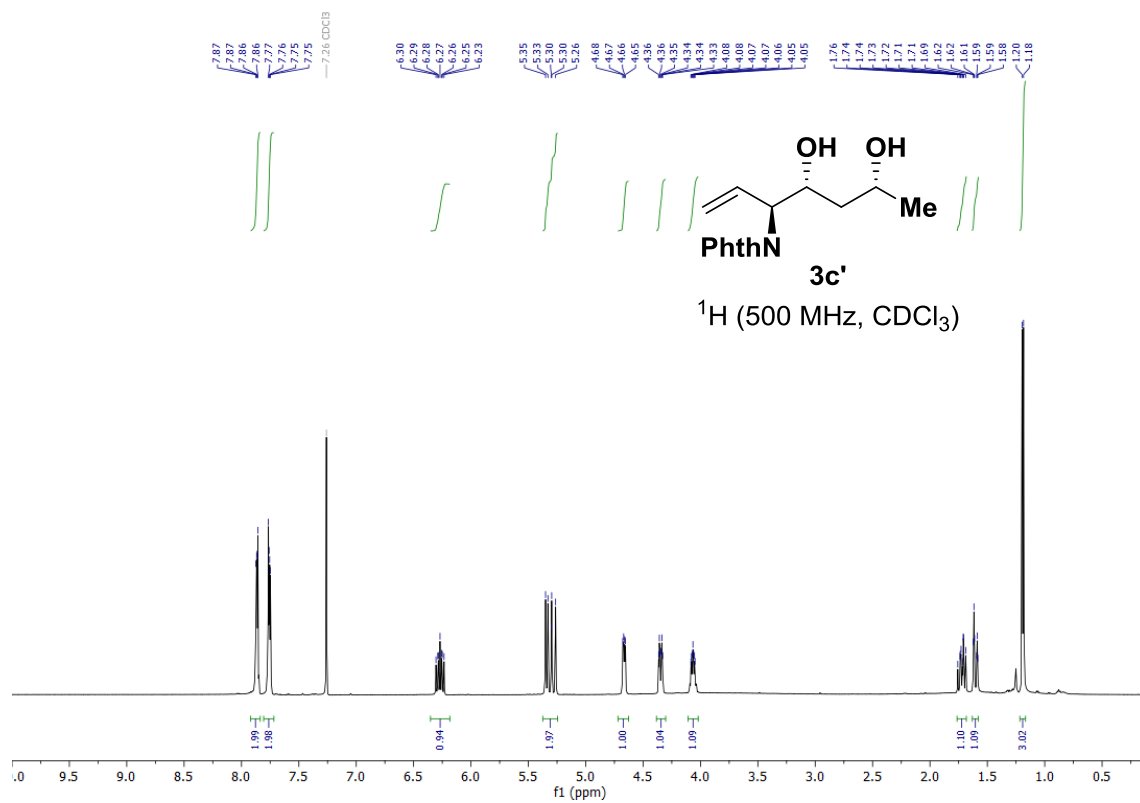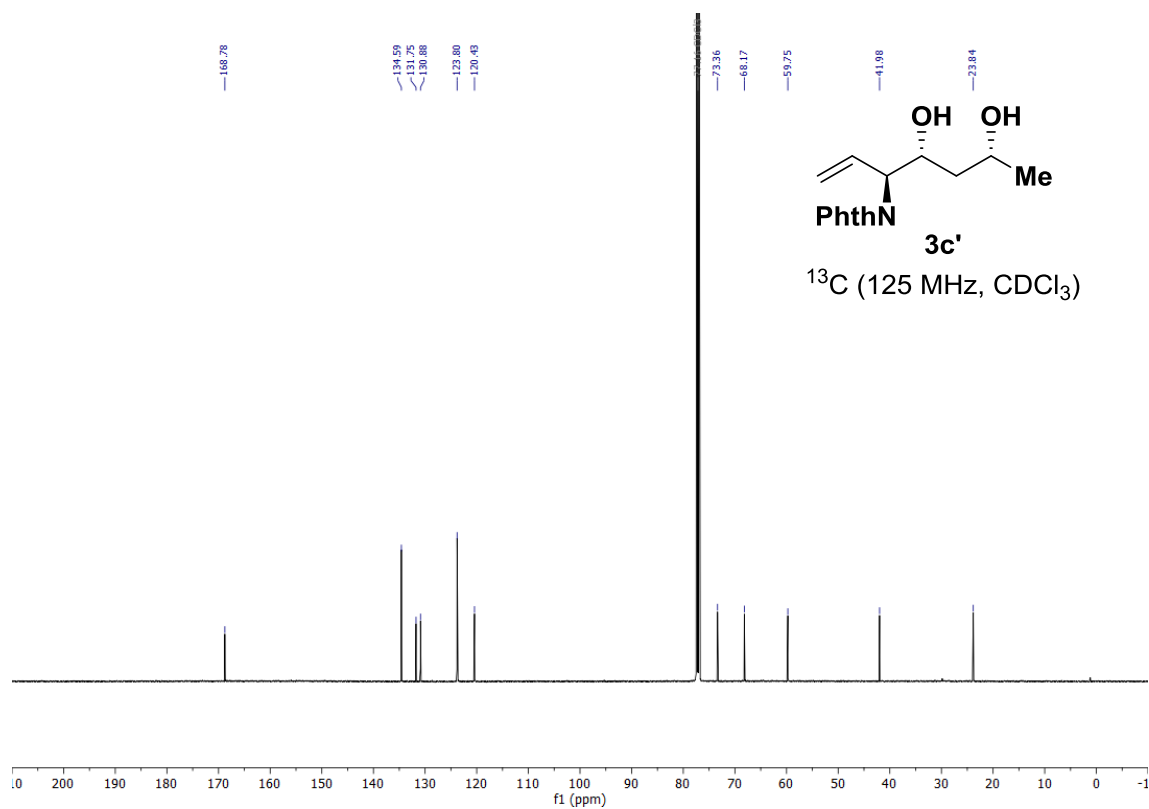

## Procedures and Spectral Data for the Elaboration of Morpholine 5a

### 2-chloro-*N*-((3*R*,4*S*)-4-hydroxy-5-phenylpent-1-en-3-yl)acetamide (**4a**)

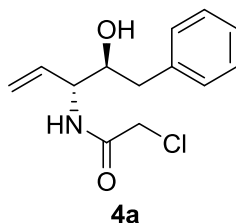

To a round bottom flask charged with coupling product **3a** (92.2 mg, 0.3 mmol, 100 mol%) was added a solution of  $\text{N}_2\text{H}_4 \cdot \text{H}_2\text{O}$  in DCM and MeOH (4:6:2, 12 mL) and the reaction mixture was stirred at room temperature for 6 hours. The reaction mixture was diluted with water (5 mL) and the mixture was transferred to a separatory funnel. The aqueous layer was extracted with DCM (6 x 10 mL). The combined organic extracts were washed with a saturated solution of sodium bicarbonate followed by brine. The solution was dried ( $\text{MgSO}_4$ ), filtered, and the solvent was removed *in vacuo*. The residue was then dissolved in DCM (2 mL, 0.15 M) and triethylamine added (81  $\mu\text{L}$ , 0.6 mmol, 200 mol%). The reaction was stirred at  $-10\text{ }^\circ\text{C}$  for 5 minutes and chloroacetyl chloride added dropwise (24  $\mu\text{L}$ , 0.6 mmol, 200 mol%). The reaction mixture was stirred at  $-10\text{ }^\circ\text{C}$  for 30 minutes and then quenched by addition of a saturated solution of ammonium chloride. The mixture was then diluted with EtOAc and the mixture transferred to a separatory funnel. The phases were separated and the organic layer was washed with saturated solutions of ammonium chloride and sodium bicarbonate followed by brine. The solution was dried ( $\text{MgSO}_4$ ), filtered, and the solvent was removed *in vacuo*. The residue was subjected to flash column chromatography ( $\text{SiO}_2$ , 60:40 EtOAc:hexanes) to yield the title compound **4a** (62.4 mg, 0.25 mmol, >20:1 dr) as a white solid in 82% yield.

**TLC** ( $\text{SiO}_2$ )  $R_f = 0.28$  (60:40 EtOAc:hexanes)

**$^1\text{H NMR}$**  (500 MHz,  $\text{CDCl}_3$ )  $\delta$ : 7.34 – 7.31 (m, 2H), 7.26 – 7.20 (m, 3H), 7.10 (d,  $J = 7.7$  Hz, 1H), 5.97 (ddd,  $J = 17.3, 10.5, 7.0$  Hz, 1H), 5.38 – 5.33 (m, 2H), 4.56 – 4.52 (m, 2H), 4.06 (brs, 2H), 3.99 (dt,  $J = 9.4, 3.7$  Hz, 1H), 2.82 (dd,  $J = 13.8, 4.2$  Hz, 1H), 2.71 (dt,  $J = 13.8, 9.4$  Hz, 1H), 1.19 (d,  $J = 6.3$  Hz, 3H).

**$^{13}\text{C NMR}$**  (125 MHz,  $\text{CDCl}_3$ )  $\delta$ : 168.6, 137.5, 132.3, 129.4, 129.0, 127.0, 119.3, 74.4, 56.3, 42.8, 40.7.

**HRMS** ( $\text{Na}^+$ ,  $m/z$ ) for  $\text{C}_{13}\text{H}_{16}\text{ClNO}_2$ : calcd. = 276.0762; found = 276.0767.

**FTIR** (neat): 3289, 2918, 1640, 1533, 1267, 1053, 936, 752, 699.

$[\alpha]_D^{34} = +37.1^\circ$  ( $c = 0.93$ ,  $\text{CHCl}_3$ ).

**MP** [81 – 85]  $^\circ\text{C}$

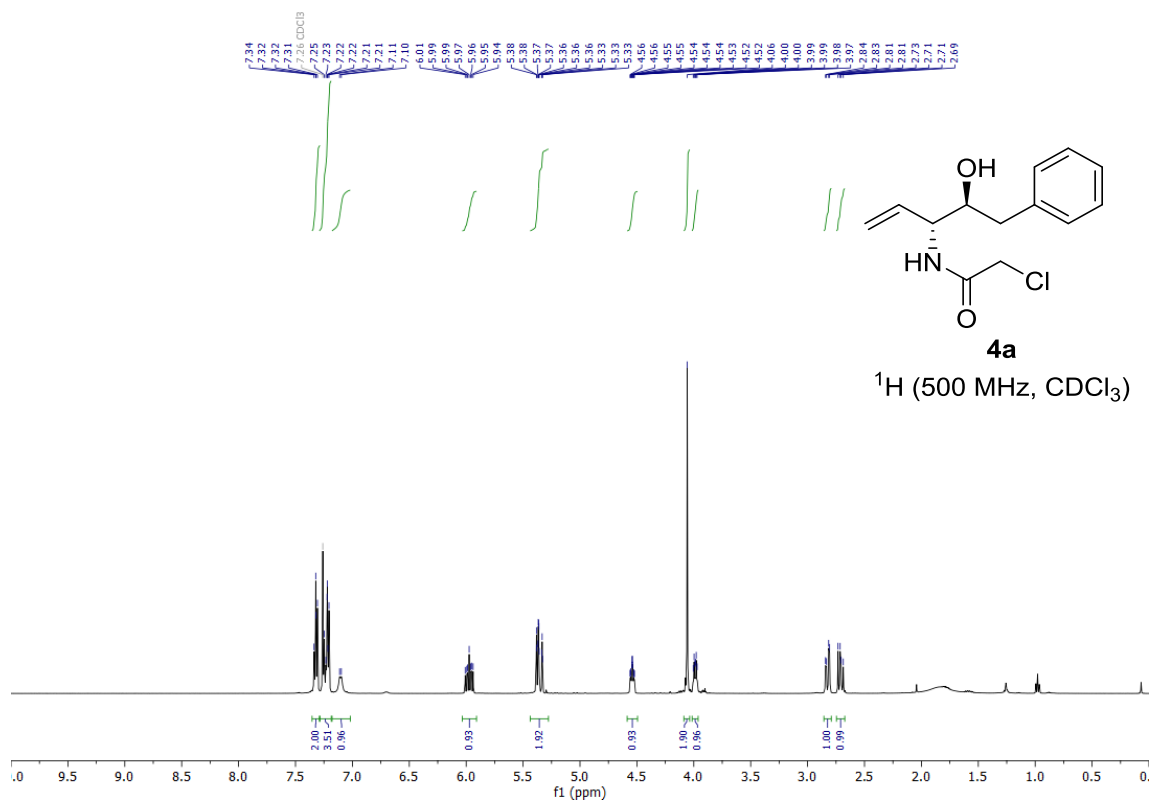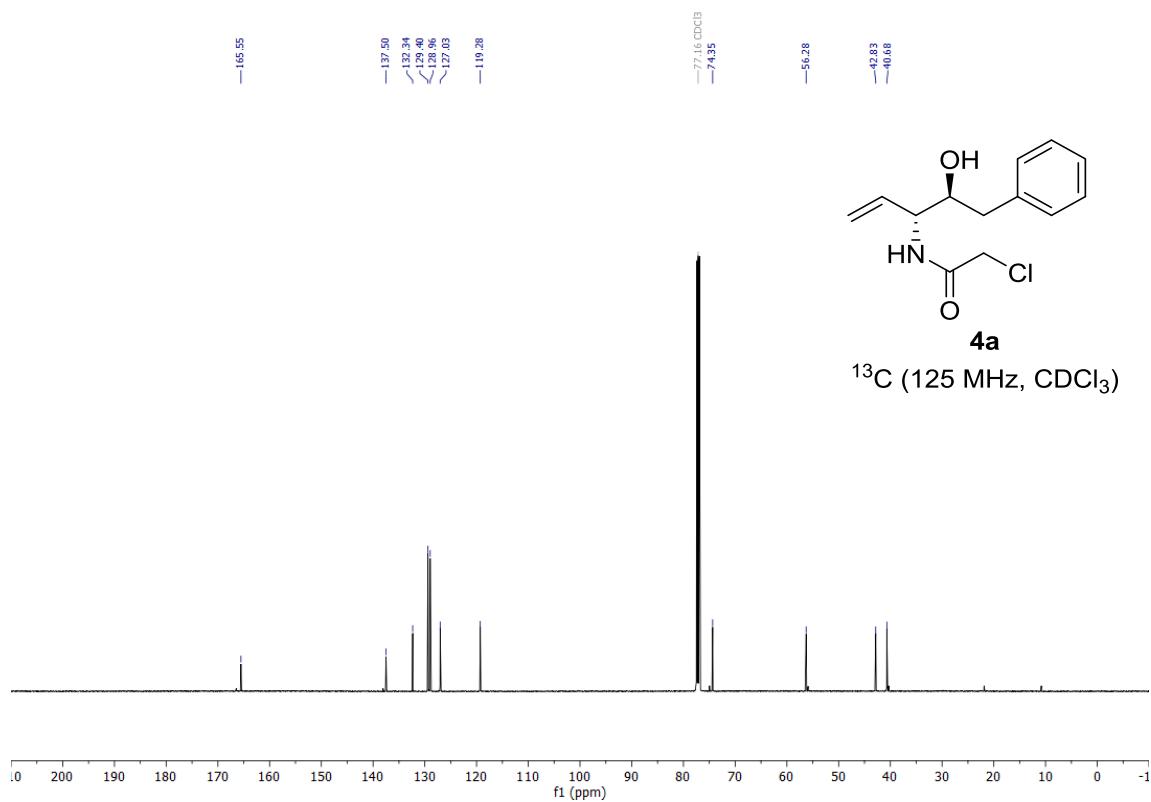

**(5*R*,6*S*)-6-benzyl-5-vinylmorpholin-3-one (S1a)**

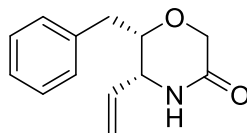

**S1a**

To a flame dried round bottomed flask charged with **4a** (52.7 mg, 0.21 mmol, 100 mol%) in THF (0.084 M) was added DMF (0.5 mL). The reaction mixture was stirred at 0 °C for 5 minutes before addition of NaH (60% w/w, 21 mg, 0.52 mmol, 250 mol%). The mixture was then stirred at 0 °C for 40 minutes. Saturated solution of ammonium chloride and EtOAc were then added and the reaction mixture transferred to a separatory funnel. The phases were separated and the organic phase washed with saturated solutions of ammonium chloride and sodium bicarbonate followed by brine. The solution was dried (MgSO<sub>4</sub>), filtered, and the solvent was removed *in vacuo*. The residue was subjected to flash column chromatography (SiO<sub>2</sub>, 70:30 EtOAc:hexanes) to yield the title compound **S1a** (33.6 mg, 0.15 mmol, >20:1 dr) as a pale-yellow oil in 74% yield.

**TLC (SiO<sub>2</sub>)** R<sub>f</sub> = 0.42 (80:20 EtOAc:hexanes)

**<sup>1</sup>H NMR** (500 MHz, CDCl<sub>3</sub>) δ: 7.32 – 7.29 (m, 2H), 7.26 – 7.20 (m, 3H), 6.42 (brs, 1H), 5.97 (ddd, *J* = 17.4, 10.1, 7.9 Hz, 1H), 5.39 (d, *J* = 10.2 Hz, 1H), 5.26 (d, *J* = 17.1 Hz, 1H), 4.29 (d, *J* = 16.9 Hz, 1H), 4.14 (d, *J* = 16.9 Hz, 1H), 4.05 – 4.01 (m, 1H), 3.78 – 3.75 (m, 1H), 2.87 (dd, *J* = 14.3, 8.0 Hz, 1H), 2.68 (dd, *J* = 14.3, 5.9 Hz, 1H).

**<sup>13</sup>C NMR** (125 MHz, CDCl<sub>3</sub>) δ: 168.8, 137.3, 134.1, 129.3, 128.7, 126.9, 119.8, 68.2, 57.8, 37.8.

**HRMS** (H<sup>+</sup>, *m/z*) for C<sub>13</sub>H<sub>15</sub>NO<sub>2</sub>: calcd. = 218.1176; found = 218.1175.

**FTIR** (neat): 3217, 3028, 2923, 1668, 1420, 1112, 740, 699.

**[α]<sub>D</sub><sup>34</sup>** = +64.8° (c = 1.18, CHCl<sub>3</sub>).

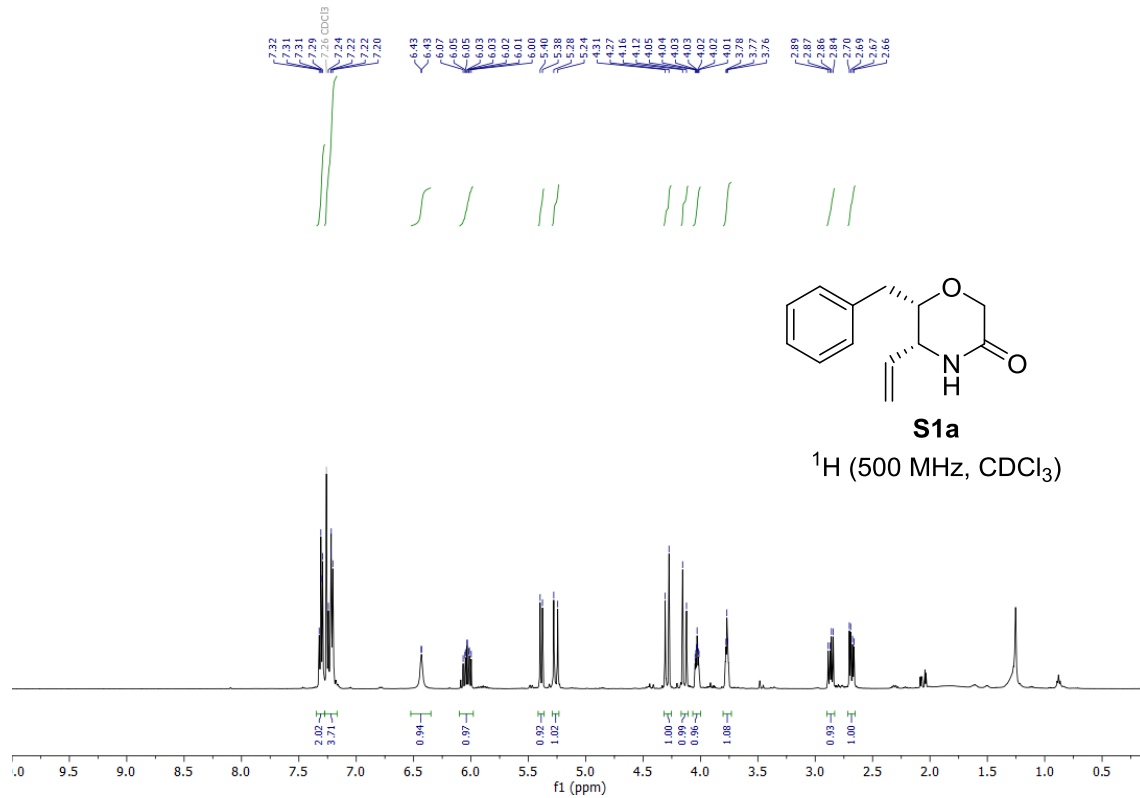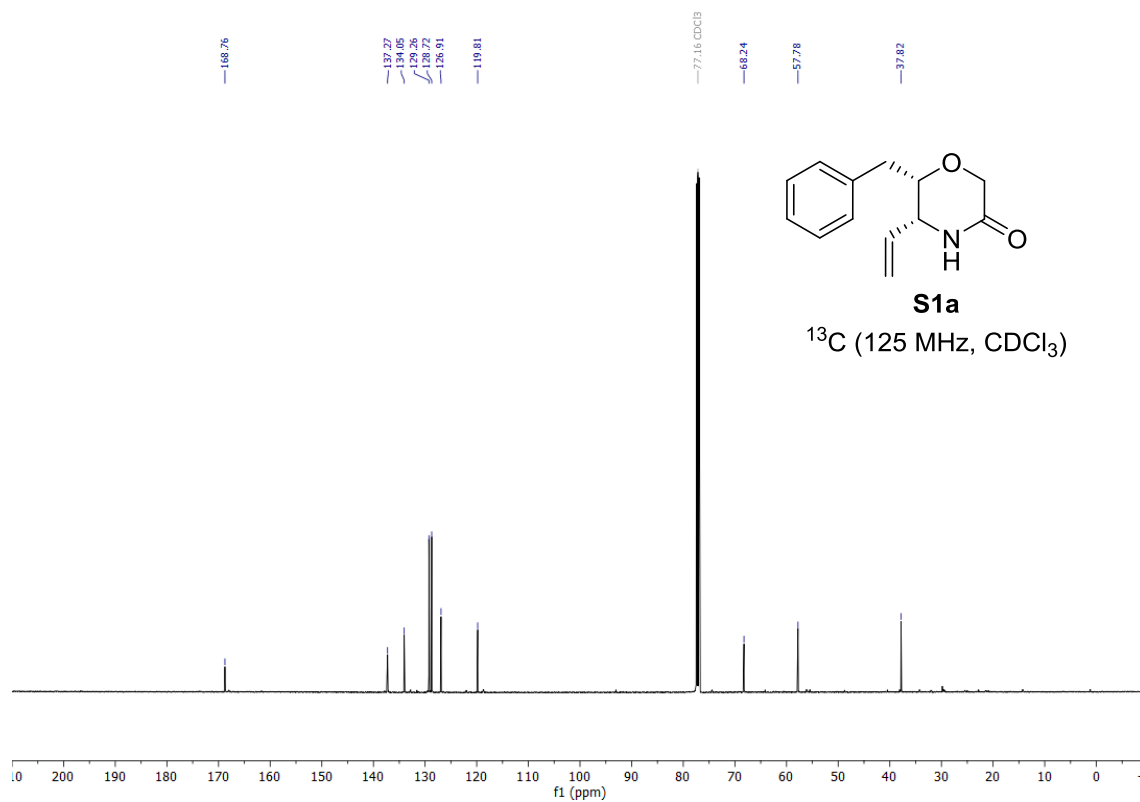

**(2*S*,3*R*)-2-benzyl-3-vinylmorpholine (5a)**

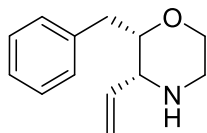

**5a**

To a flame dried round bottomed flask charged with LiAlH<sub>4</sub> (20 mg, 0.30 mmol, 300 mol%) in THF (0.05 M) was added **S1a** (21.7 mg, 0.1 mmol, 100 mol%) in THF (0.05 M) at 0 °C. The reaction mixture was stirred reflux for 6 hours. Water (30 μL), NaOH (10% aq. Solution, 30 μL), and MgSO<sub>4</sub> added to the reaction mixture. The resulting mixture was filtered over a celite plug, washed with MeOH, and the solvent removed *in vacuo*. The residue was subjected to flash column chromatography (SiO<sub>2</sub>, 95:5 DCM:MeOH) to yield the title compound **5a** (14.6 mg, 0.07 mmol, >20:1 dr) as a pale-yellow oil in 72% yield.

**TLC (SiO<sub>2</sub>)** R<sub>f</sub> = 0.22 (95:5 DCM:MeOH)

**<sup>1</sup>H NMR** (500 MHz, CDCl<sub>3</sub>) δ: 7.29 – 7.26 (m, 2H), 7.21 – 7.19 (m, 3H), 6.43 (dt, *J* = 17.1, 9.6 Hz, 1H), 5.33 (d, *J* = 9.7 Hz, 1H), 5.24 (d, *J* = 17.3 Hz, 1H), 3.96 (ddd, *J* = 8.4, 6.0, 2.6 Hz, 1H), 3.93 (dt, *J* = 11.5, 3.0 Hz, 1H), 3.69 (td, *J* = 11.1, 2.8 Hz, 1H), 3.25 (dd, *J* = 8.8, 2.7 Hz, 1H), 3.21 (td, *J* = 11.4, 3.6 Hz, 1H), 2.81 (dd, *J* = 14.3, 8.0 Hz, 1H), 2.66 (dt, *J* = 12.2, 2.8 Hz, 1H), 2.57 (dd, *J* = 14.2, 6.0 Hz, 1H), 2.09 (brs, 1H).

**<sup>13</sup>C NMR** (125 MHz, CDCl<sub>3</sub>) δ: 138.2, 134.2, 129.4, 128.5, 126.4, 119.6, 79.1, 67.1, 58.7, 40.6, 38.3.

**HRMS** (H<sup>+</sup>, *m/z*) for C<sub>13</sub>H<sub>17</sub>NO: calcd. = 204.1383; found = 204.1387.

**FTIR** (neat): 2921, 2854, 1454, 1085, 923, 698.

**[α]<sub>D</sub><sup>34</sup>** = -8.2° (c = 0.79, CHCl<sub>3</sub>).



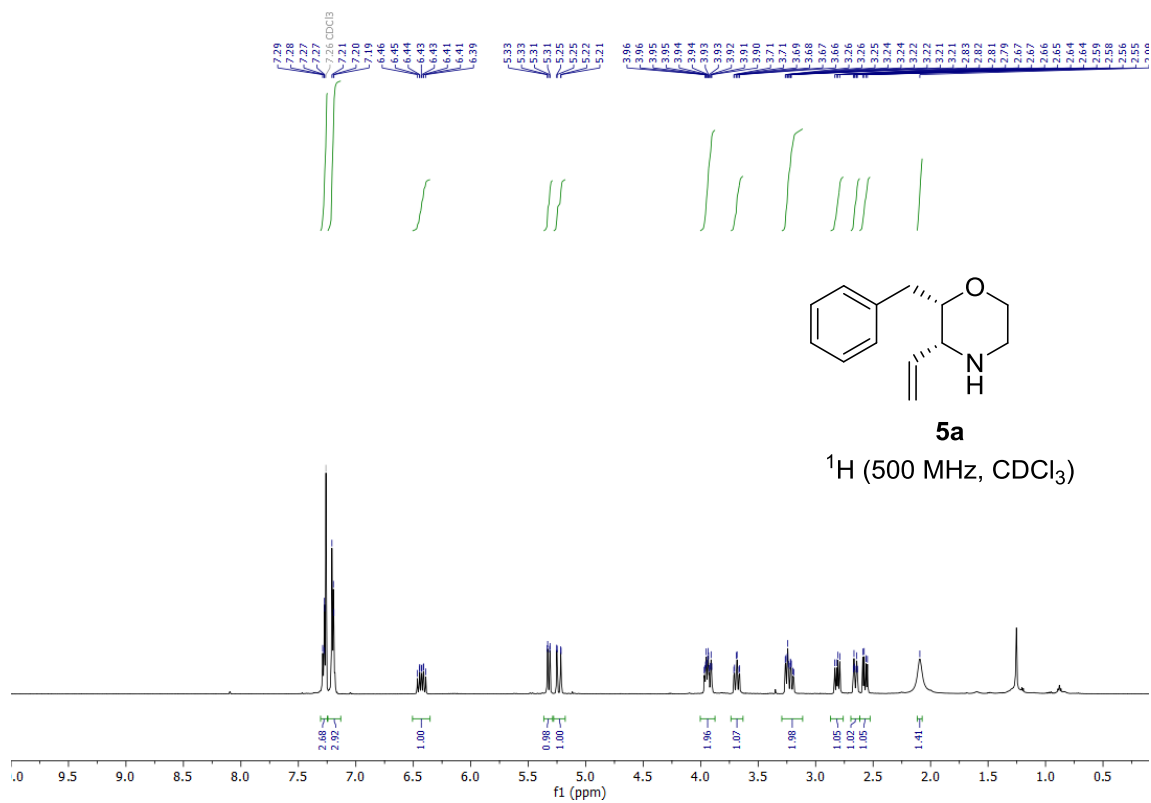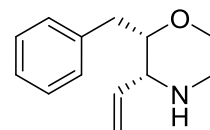

**5a**

$^1\text{H}$  (500 MHz,  $\text{CDCl}_3$ )

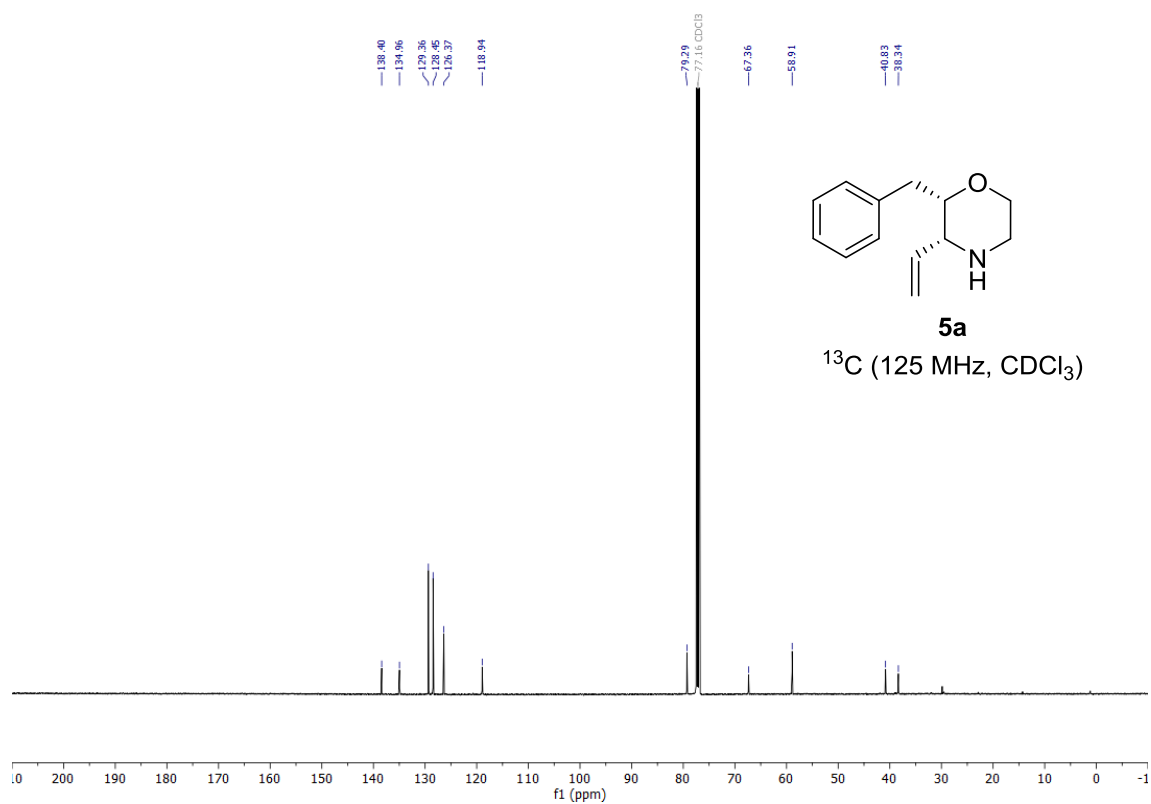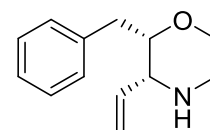

**5a**

$^{13}\text{C}$  (125 MHz,  $\text{CDCl}_3$ )

## Procedures and Spectral Data for the Elaboration of Amino-Acid 6m

### 2-((3*R*,4*S*)-4-((tert-butyldimethylsilyl)oxy)-7,7,7-trifluorohept-1-en-3-yl)isoindoline-1,3-dione (**S2m**)

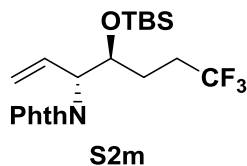

To a solution of alcohol **3m** (50.0 mg, 0.117 mmol, 100 mol%) in dried DMF (220  $\mu$ L) was added Et<sub>3</sub>N (82  $\mu$ L, 0.585 mmol, 500 mol%), TBSCl (44.0 mg, 0.293 mmol, 250 mol%) and 4-(dimethylamino)pyridine (2.9 mg, 0.0232 mmol, 20 mol%). The reaction was heated to 45 °C for 48 h. The contents were diluted with CH<sub>2</sub>Cl<sub>2</sub> (2 mL) and washed with H<sub>2</sub>O (2 mL). The aqueous layer was extracted with CH<sub>2</sub>Cl<sub>2</sub> (2 x 5 mL), and the combined organic phases were washed with brine (2 mL), dried (Na<sub>2</sub>SO<sub>4</sub>), filtered and the solvent was removed in vacuo. The residue was subjected to flash chromatography on silica (EtOAc:hexanes 10:90) to furnish the title compound **S2m** (43.5 mg, 0.102 mmol) in 87% yield as a clear oil.

**TLC (SiO<sub>2</sub>)** R<sub>f</sub> = 0.26 (10:90 EtOAc:hexanes)

**<sup>1</sup>H NMR** (500 MHz, CDCl<sub>3</sub>)  $\delta$ : 7.85 (dd, *J* = 5.4, 3.1 Hz, 2H), 7.74 (dd, *J* = 5.4, 3.0 Hz, 2H), 6.25 (ddd, *J* = 17.2, 10.1, 7.2 Hz, 1H), 5.25 – 5.22 (m, 2H), 4.62 – 4.55 (m, 2H), 2.35 – 2.24 (m, 1H), 2.21 – 2.10 (m, 1H), 1.80 – 1.73 (m, 1H), 1.61 – 1.54 (m, 1H), 0.90 (s, 9H), 0.11 (s, 3H), 0.10 (s, 3H).

**<sup>13</sup>C NMR** (125 MHz, CDCl<sub>3</sub>)  $\delta$ : 168.0, 134.4, 133.4, 131.8, 127.6 (q, *J* = 275.8 Hz), 123.6, 120.0, 68.9, 57.1, 27.6 (q, *J* = 29.0 Hz), 25.9, 18.1, – 4.2, – 4.2.

**<sup>19</sup>F NMR** (470 MHz, CDCl<sub>3</sub>)  $\delta$ : -66.5 (t, *J* = 10.8 Hz).

**HRMS** (Na<sup>+</sup>, *m/z*) for C<sub>21</sub>H<sub>28</sub>F<sub>3</sub>NO<sub>3</sub>Si: calcd. = 450.1683; found = 450.1686.

**FTIR** (neat): 2956, 2931, 2858, 1716, 1379, 1254, 1060, 834, 717.

$[\alpha]_D^{24} = +52.2^\circ$  (*c* = 1.13, CHCl<sub>3</sub>).

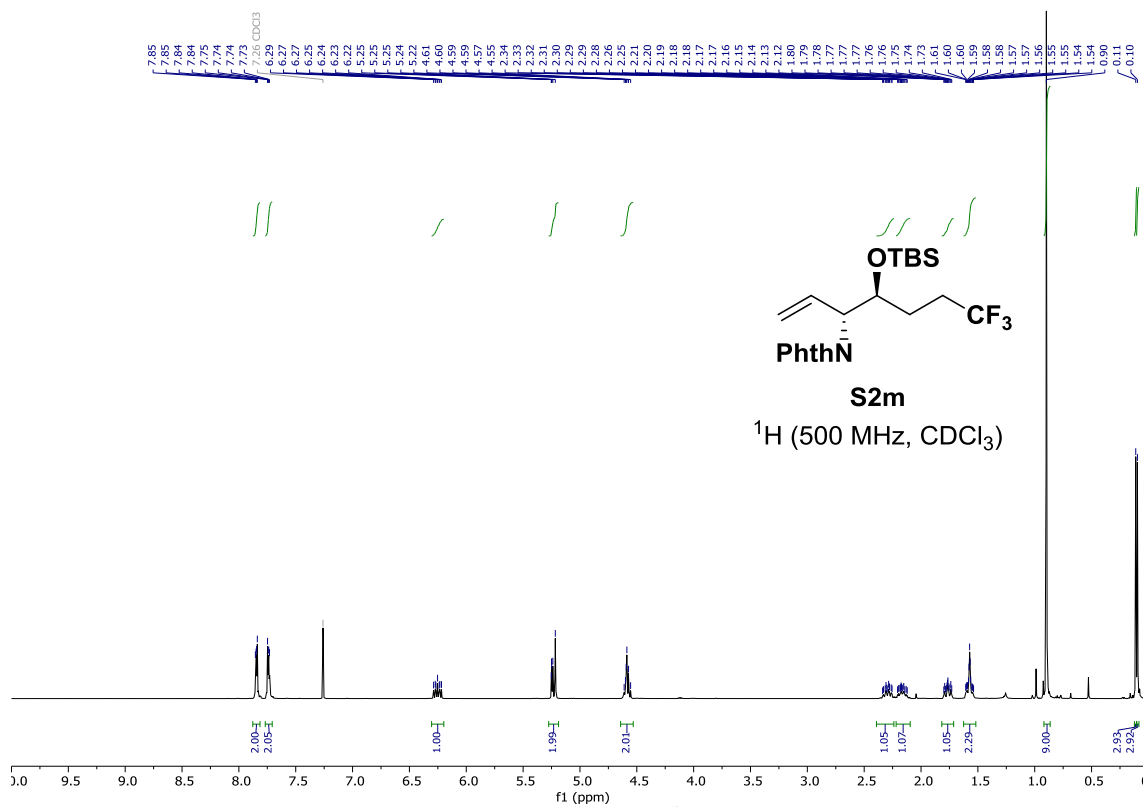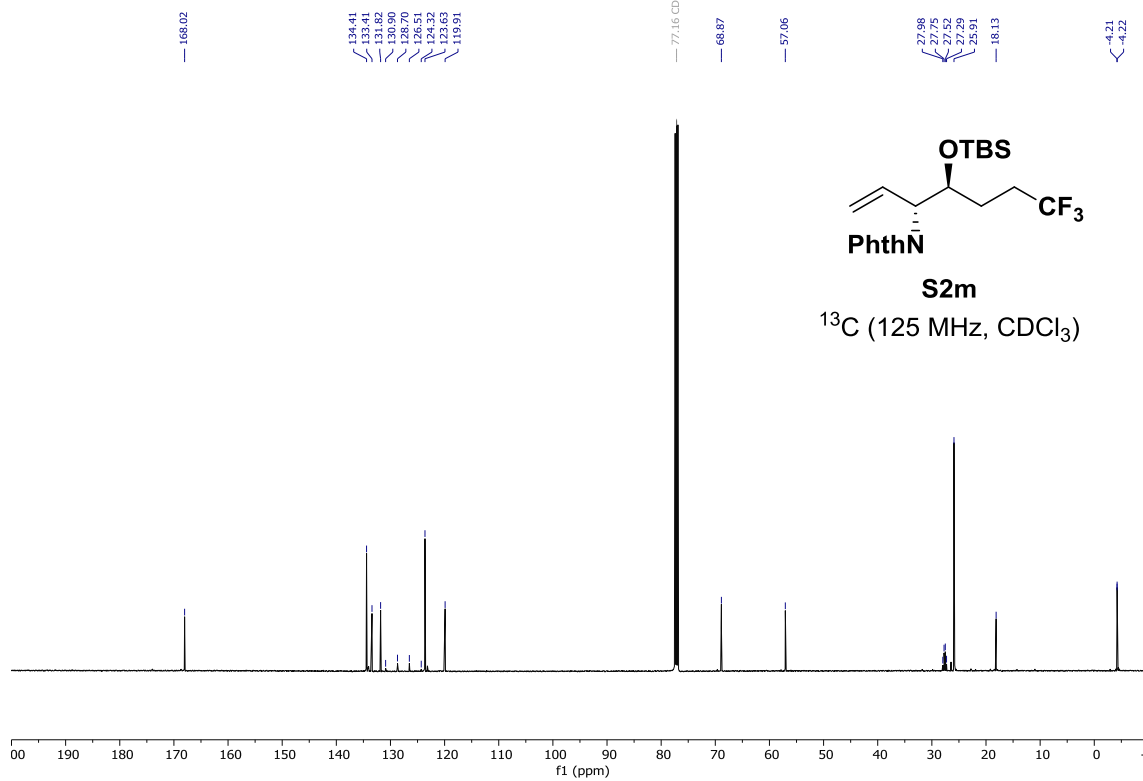

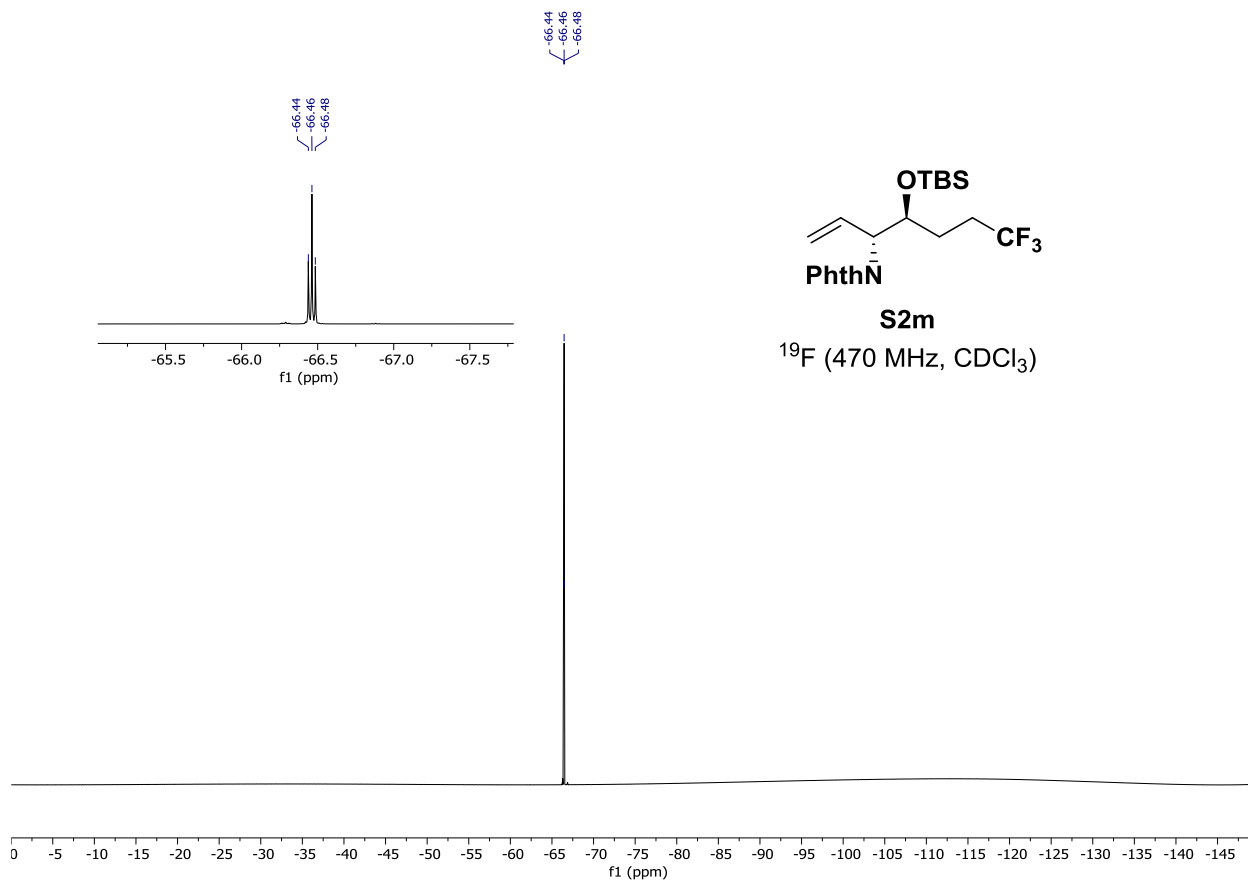

**(2*S*,3*S*)-3-((tert-butyldimethylsilyl)oxy)-2-(1,3-dioxisoindolin-2-yl)-6,6,6-trifluorohexanoic acid (6m)**

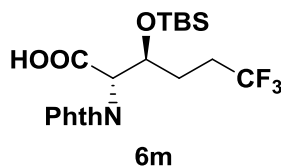

To a stirred solution of **S2a** (100.0 mg, 0.230 mmol, 100 mol%), in 0.650 mL CCl<sub>4</sub>, 0.650 mL CH<sub>3</sub>CN, and 1.0 mL H<sub>2</sub>O was added NaIO<sub>4</sub> (201.2 mg, 0.940 mmol, 400 mol%). After all the NaIO<sub>4</sub> had dissolved, RuCl<sub>3</sub>·H<sub>2</sub>O (4.8 mg, 0.023 mmol, 10 mol%) was added, and the reaction mixture was stirred vigorously for 24 h at 25 °C. The contents were diluted with DCM (5 mL) and washed with H<sub>2</sub>O (5 mL). The aqueous layer was extracted with DCM (3 x 5 mL), and the combined organic phases were washed with brine (5 mL), dried (Na<sub>2</sub>SO<sub>4</sub>), filtered and the solvent was removed in vacuo. The residue was subjected to flash chromatography on silica (Hexanes/MeOH 90:10) to furnish the title compound **6a** (59.2 mg, 0.136 mmol) in 59% yield as a white solid.

**TLC (SiO<sub>2</sub>)** R<sub>f</sub> = 0.22 (10:90 MeOH:DCM)

**<sup>1</sup>H NMR** (500 MHz, MeOD) δ: 7.89 (dd, *J* = 5.4, 3.1 Hz, 2H), 7.83 (dd, *J* = 5.4, 3.0 Hz, 2H), 4.73 – 4.70 (m, 1H), 2.28 – 2.13 (m, 2H), 2.10 – 2.03 (m, 1H), 1.62 – 1.54 (m, 1H), 0.85 (s, 9H), 0.23 (s, 3H), 0.14 (s, 3H).

**<sup>13</sup>C NMR** (125 MHz, MeOD) δ: 170.2, 168.0, 134.4, 131.6, 127.3 (q, *J* = 275.8 Hz), 122.9, 78.1, 70.0, 30.0 (q, *J* = 29.0 Hz), 26.4, 24.9, 17.4, – 5.7, – 6.0.

**<sup>19</sup>F NMR** (470 MHz, MeOD) δ: -68.0 (t, *J* = 10.8 Hz).

**HRMS** (Na<sup>+</sup>, *m/z*) for C<sub>20</sub>H<sub>26</sub>F<sub>3</sub>NO<sub>5</sub>Si: calcd. = 468.1425; found = 468.1425.

**FTIR** (neat): 2935, 2360, 1720, 1385, 1253, 1066, 835, 777, 721.

[α]<sub>D</sub><sup>24</sup> = –31.1° (c = 1.83, CHCl<sub>3</sub>).

**MP** [62 – 65] °C

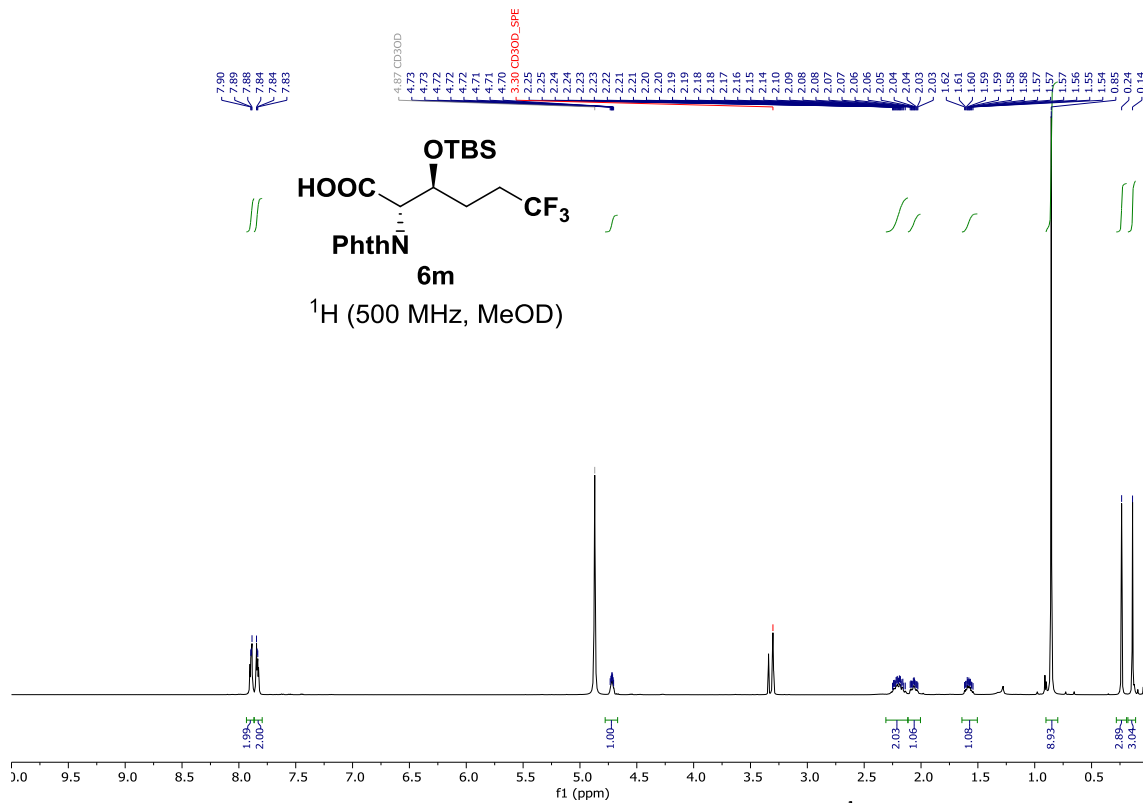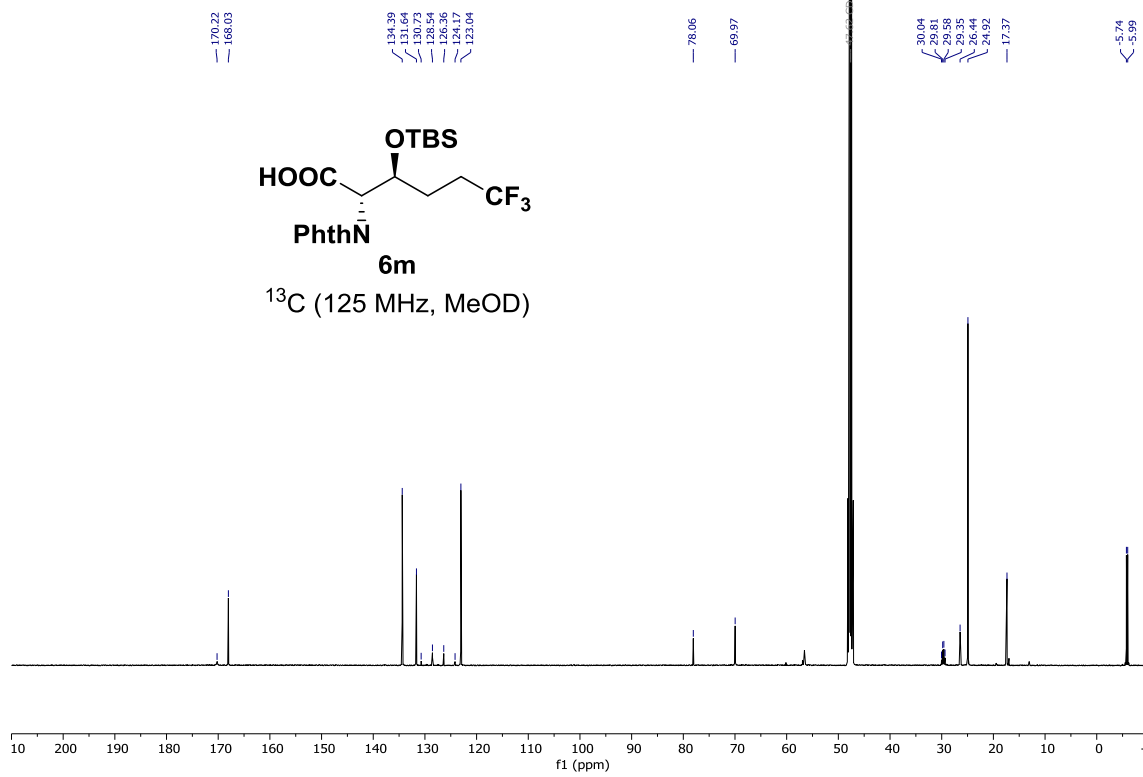

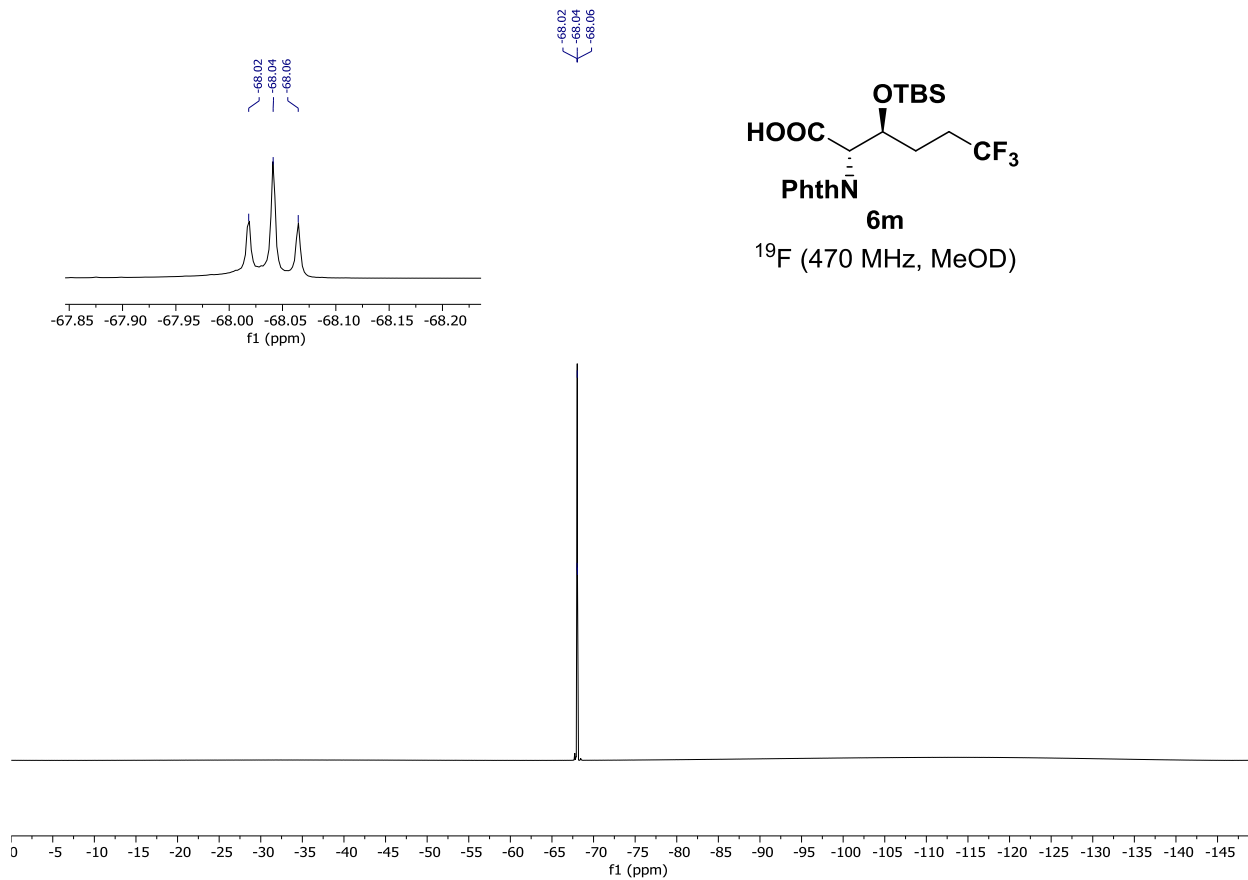

## Isotopic Labeling Studies

### 2-phenylethan-1,1-d<sub>2</sub>-1-ol (deuterio-2a)

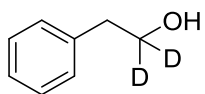

**deuterio-2a**

The title compound was synthesized over one step from 2-phenylacetic acid following literature procedures.<sup>4</sup>

**<sup>1</sup>H NMR** (500 MHz, CDCl<sub>3</sub>) δ: 7.34 – 7.30 (m, 2H), 7.26 – 7.22 (m, 3H), 2.86 (brs, 2H)

**<sup>2</sup>H NMR** (92 MHz, CHCl<sub>3</sub>) δ: 3.86 (brs, 2D)

**HRMS** (H<sup>+</sup>, *m/z*) for C<sub>8</sub>H<sub>8</sub>D<sub>2</sub>O: calcd. = 124.0857; found = 124.0861.



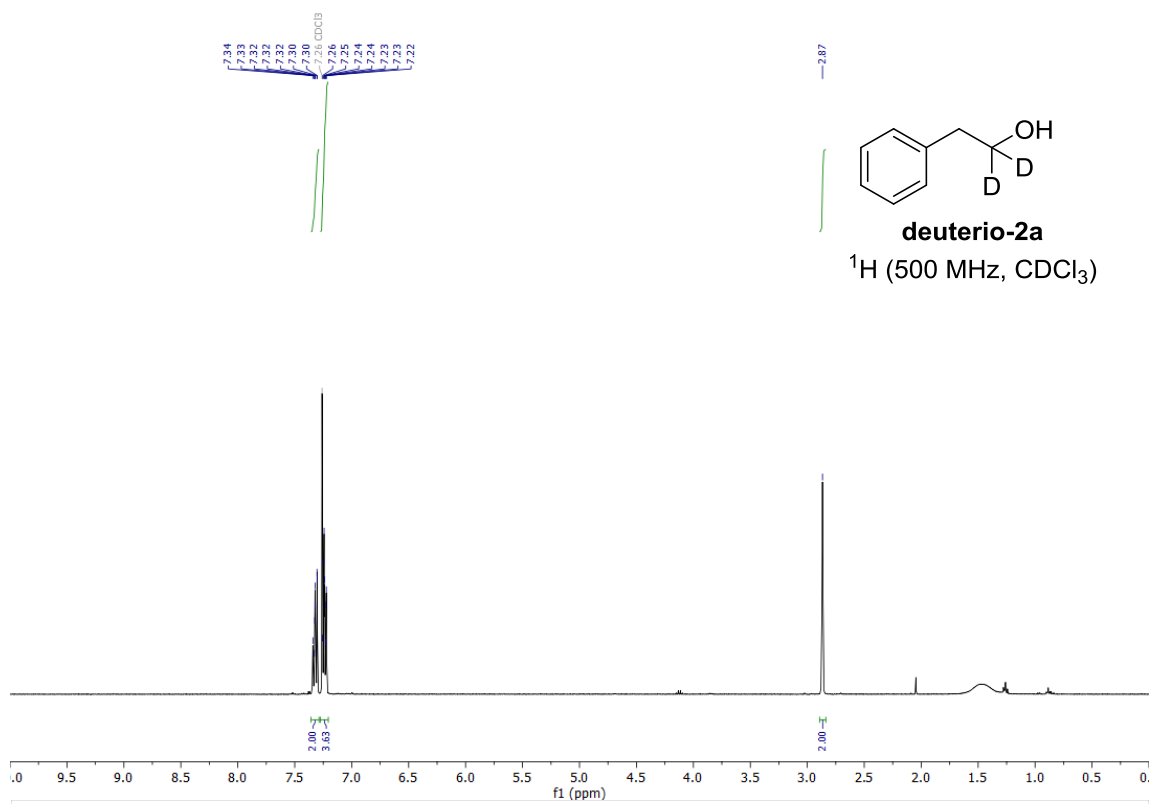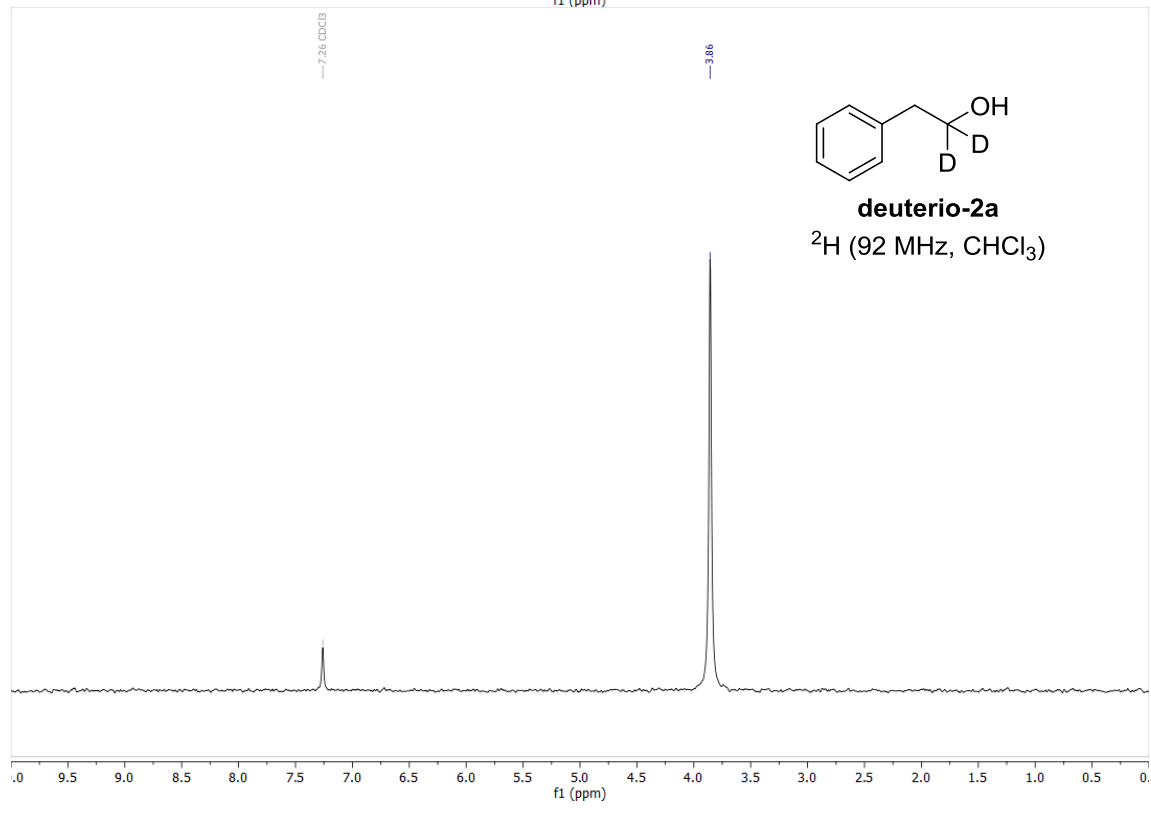

**2-((3*R*,4*S*)-4-hydroxy-5-phenylpent-1-en-3-yl)isoindoline-1,3-dione-d (deuterio-3a)**

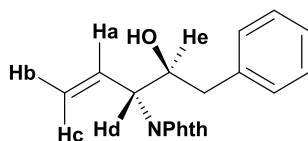

**deuterio-3a**

Ha (60%  $^2\text{H}$ ), Hb,Hc (25%  $^2\text{H}$ )

Hd (<1%), He (>99%  $^2\text{H}$ )

Alcohol **deuterio-2a** (24.0  $\mu\text{L}$ , 0.2 mmol) was subjected to standard reaction conditions (100  $^\circ\text{C}$ , 48 h). Upon flash column chromatography ( $\text{SiO}_2$ , 20:80 EtOAc:hexanes), the title compound **deuterio-3a** (41.8 mg, 0.14 mmol, >20:1 dr) was obtained as a light yellow solid in 68% yield.

**TLC** ( $\text{SiO}_2$ )  $R_f$  = 0.35 (20:80 EtOAc:hexanes)

**$^1\text{H}$  NMR** (500 MHz,  $\text{CDCl}_3$ )  $\delta$ : 7.83 (dd,  $J$  = 5.4, 3.1 Hz, 2H), 7.73 (dd,  $J$  = 5.5, 3.0 Hz, 2H), 7.28 – 7.15 (m, 5H), 6.39 – 6.30 (m, 0.4H), 5.37 – 5.28 (m, 1.75H), 4.78 – 4.76 (m, 1H), 3.42 (brs, 1H), 2.89 – 2.81 (m, 2H).

**$^2\text{H}$  NMR** (92 MHz,  $\text{CHCl}_3$ )  $\delta$ : 6.38 (brs, 0.6D), 5.37 (brs, 0.25D), 4.41 (brs, 1D).

**HRMS** ( $\text{H}^+$ ,  $m/z$ ) for  $\text{C}_{19}\text{H}_{15}\text{D}_2\text{NO}_3$ : calcd. = 310.1407; found = 310.1416.

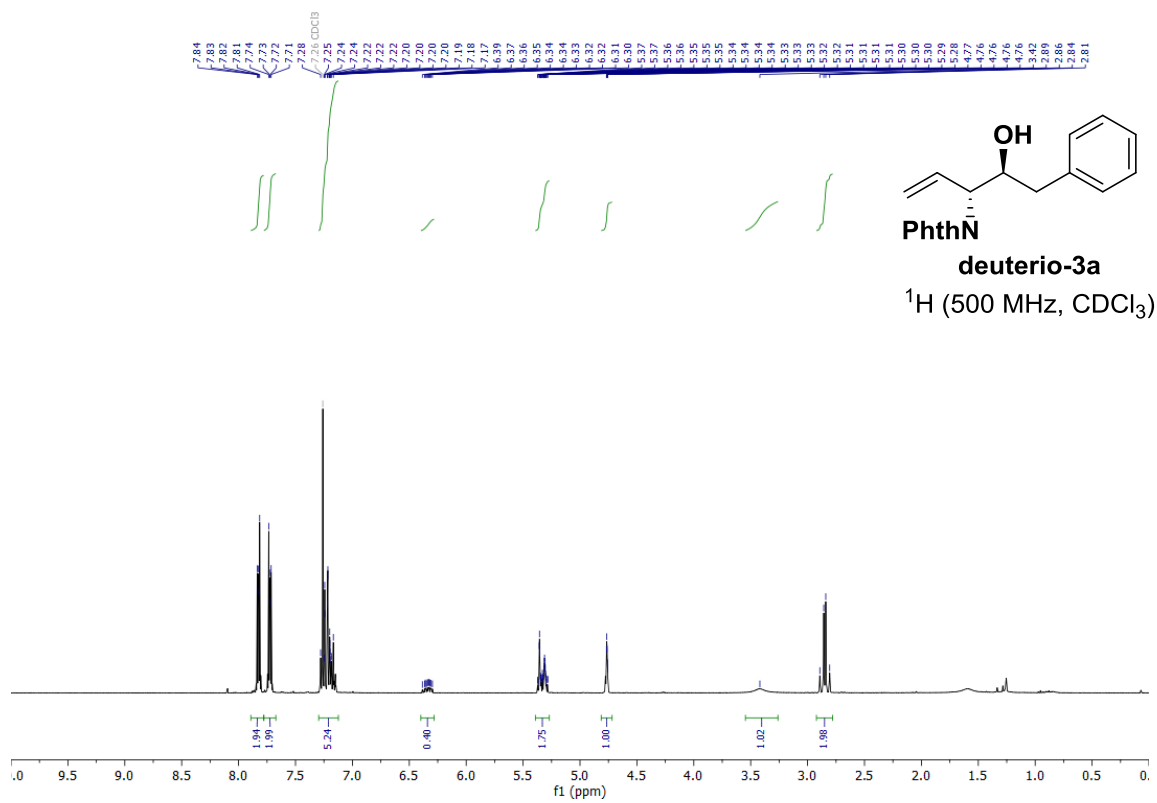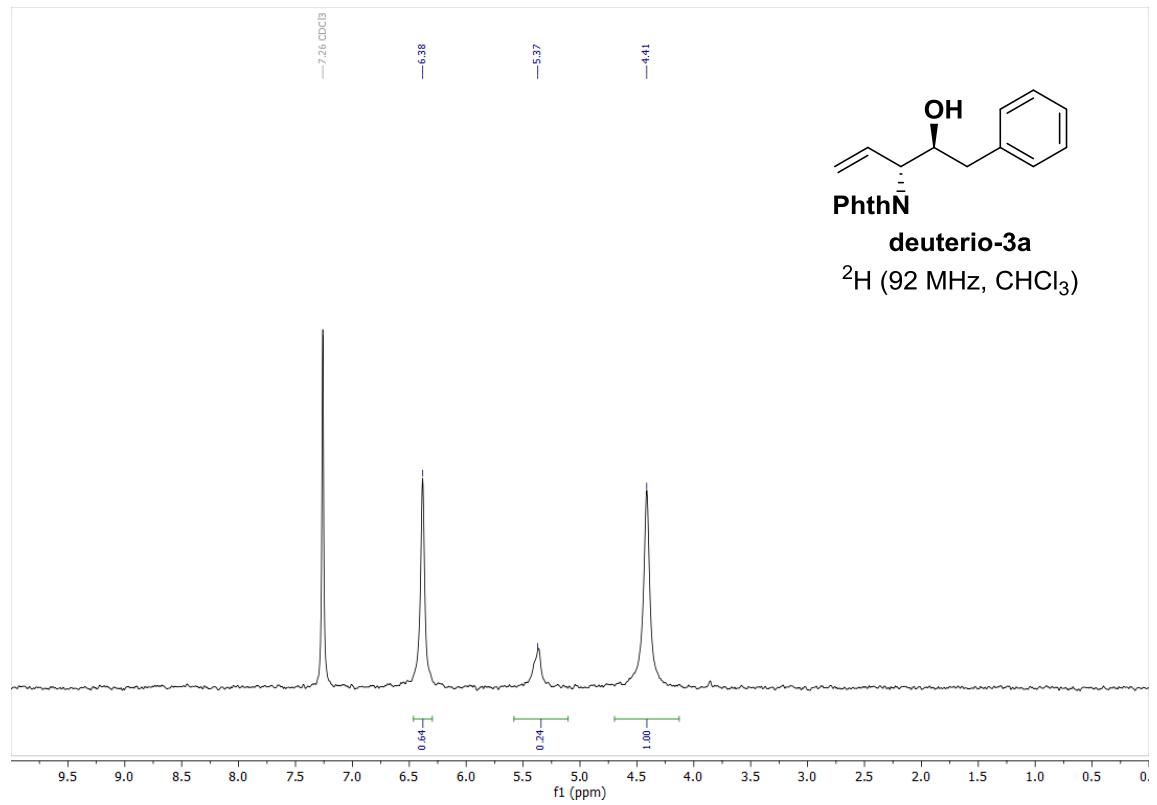

### Competition experiment:

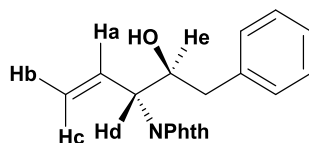

**deuterio-3a and 3a**

Ha (5%  $^2\text{H}$ ), Hb,Hc (<1%  $^2\text{H}$ )

Hd (<1%), He (30%  $^2\text{H}$ )

A mix of Alcohol **2a** (120  $\mu\text{L}$ , 1.0 mmol) and Alcohol **deuterio-2a** (120.0  $\mu\text{L}$ , 1.0 mmol) was subjected to standard reaction conditions (100  $^\circ\text{C}$ , 48 h). Upon flash column chromatography ( $\text{SiO}_2$ , 20:80 EtOAc:hexanes), title compounds **deuterio-3a** and **3a** (31.9 mg, 0.10 mmol, >20:1 dr) was obtained as a light yellow solid in 52% yield.

**TLC** ( $\text{SiO}_2$ )  $R_f$  = 0.35 (20:80 EtOAc:hexanes)

$^1\text{H NMR}$  (500 MHz,  $\text{CDCl}_3$ )  $\delta$ : 7.83 (dd,  $J$  = 5.4, 3.1 Hz, 2H), 7.73 (dd,  $J$  = 5.5, 3.0 Hz, 2H), 7.28 – 7.15 (m, 5H), 6.39 – 6.30 (m, 0.85H), 5.37 – 5.28 (m, 1.95H), 4.78 – 4.76 (m, 1H), 4.41 (ddd,  $J$  = 7.8, 5.9, 4.7 Hz, 0.7H), 3.42 (brs, 1H), 2.89 – 2.81 (m, 2H).

$^2\text{H NMR}$  (92 MHz,  $\text{CHCl}_3$ )  $\delta$ : 6.38 (brs, 1D), 5.37 (brs, 1D), 4.41 (brs, 1D).

**HRMS** ( $\text{Na}^+$ ,  $m/z$ ) for  $\text{C}_{19}\text{H}_{17}\text{NO}_3$ : calcd. = 330.1101; found = 330.1105.

**HRMS** ( $\text{Na}^+$ ,  $m/z$ ) for  $\text{C}_{19}\text{H}_{16}\text{DNO}_3$ : calcd. = 331.1163; found = 331.1164.

**HRMS** ( $\text{Na}^+$ ,  $m/z$ ) for  $\text{C}_{19}\text{H}_{15}\text{D}_2\text{NO}_3$ : calcd. = 332.1226; found = 332.1226.

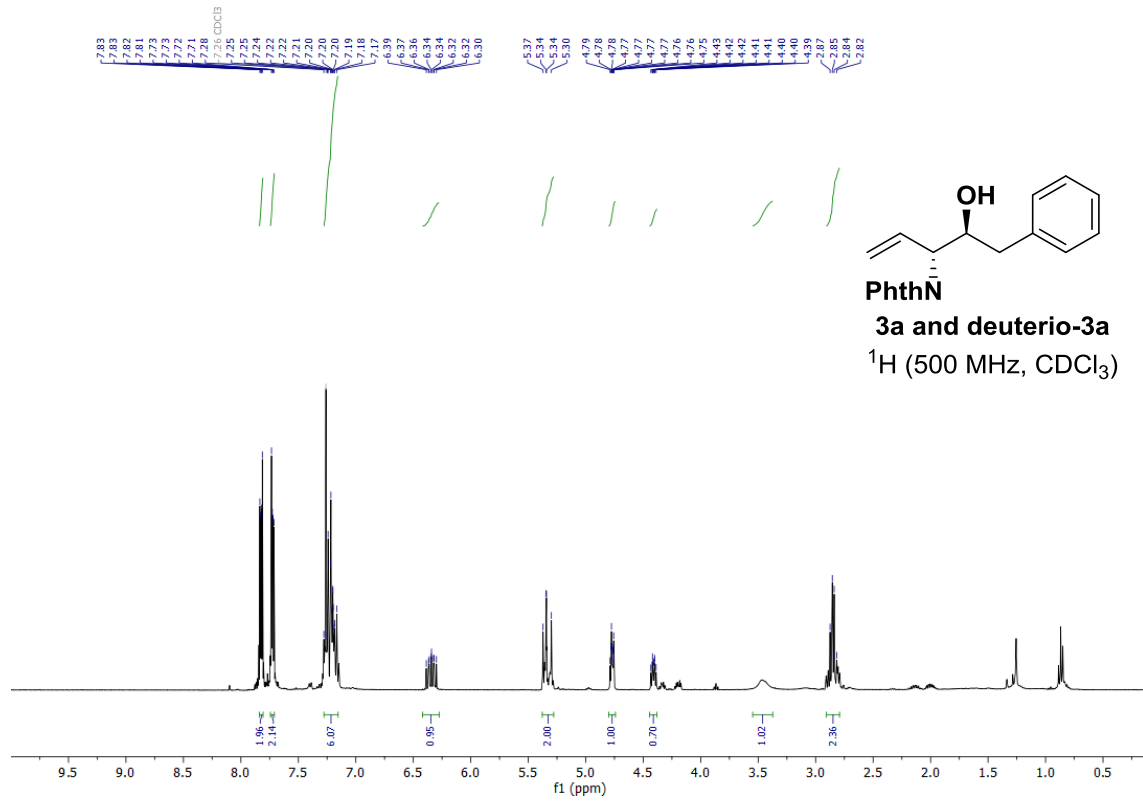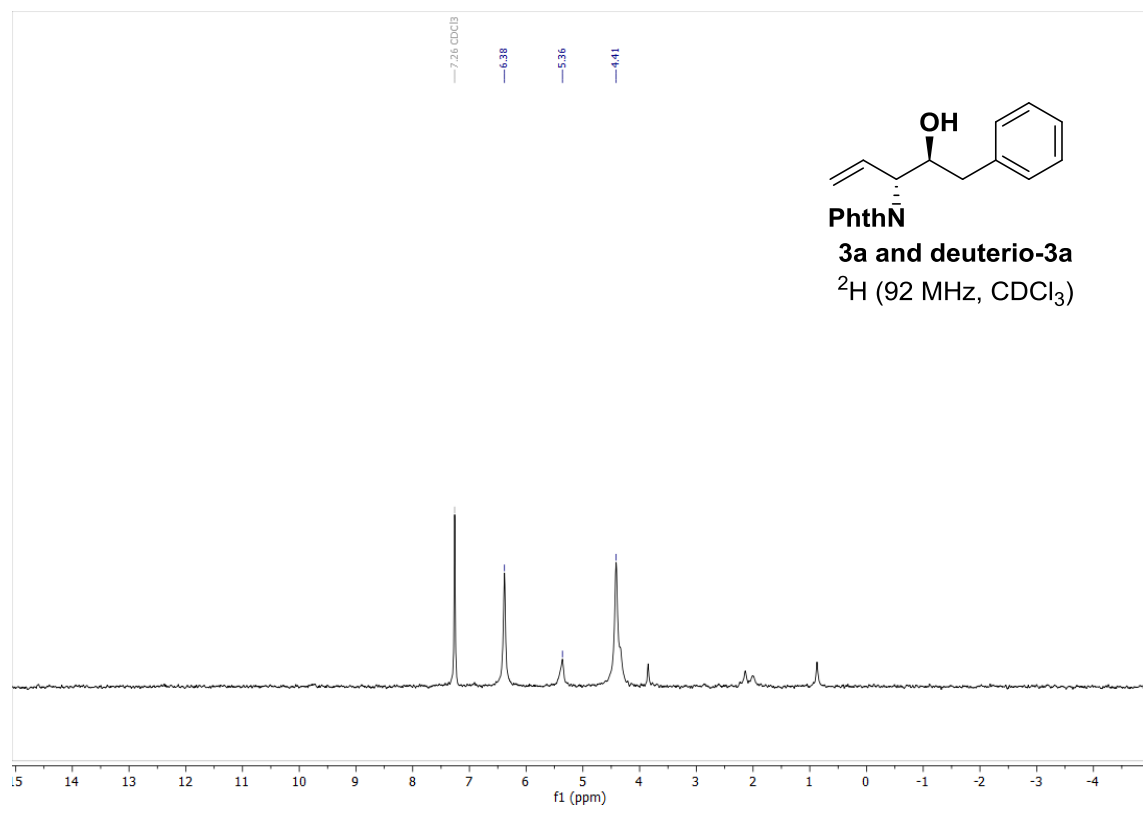

### Intermolecular competition experiment:

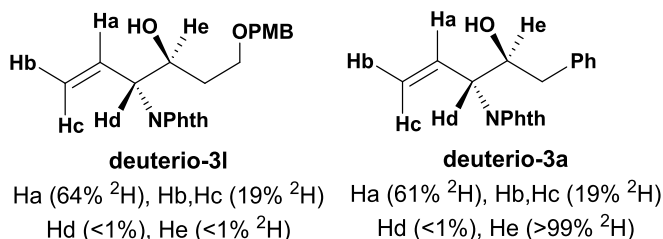

A mix of **dehydro-2l** (19 mg, 0.1 mmol) and Alcohol **deuterio-2a** (12  $\mu\text{L}$ , 0.1 mmol) was subjected to standard reaction conditions (100  $^\circ\text{C}$ , 48 h). Upon flash column chromatography ( $\text{SiO}_2$ , 20:80 EtOAc:hexanes), title compounds **deuterio-3a** (13.0 mg, 0.042 mmol, 21% yield) and **deuterio-3l** (21.3 mg, 0.056 mmol, 28% yield) were obtained as a light yellow solid and pale yellow oil respectively.

**TLC ( $\text{SiO}_2$ )**  $R_{\text{f-deuterio-3a}} = 0.35$  (20:80 EtOAc:hexanes)

**TLC ( $\text{SiO}_2$ )**  $R_{\text{f-deuterio-3l}} = 0.28$  (30:70 EtOAc:hexanes)

#### **Deuterio-3l:**

$^1\text{H NMR}$  (500 MHz,  $\text{CDCl}_3$ )  $\delta$ : 7.84 (dd,  $J = 5.4, 3.1$  Hz, 2H), 7.73 (dd,  $J = 5.4, 3.0$  Hz, 2H), 7.23 (d,  $J = 8.5$  Hz, 2H), 6.85 (d,  $J = 8.6$  Hz, 2H), 6.38 – 6.28 (m, 0.4H), 5.32 – 5.23 (m, 1.90H), 4.74 – 4.69 (m, 1H), 4.46 – 4.39 (m, 2H), 4.35 (dd,  $J = 12.1, 5.8$  Hz, 1H), 3.92 (s, 1H), 3.78 (s, 3H), 3.71 – 3.65 (m, 1H), 3.64 – 3.58 (m, 1H), 1.85 – 1.77 (m, 2H).

$^2\text{H NMR}$  (92 MHz,  $\text{CHCl}_3$ )  $\delta$ : 6.36 (brs, 1D), 5.31 (brs, 1D)

**HRMS** ( $\text{Na}^+$ ,  $m/z$ ) for  $\text{C}_{22}\text{H}_{22}\text{DNO}_5$ : calcd. = 405.1531; found = 405.1530.

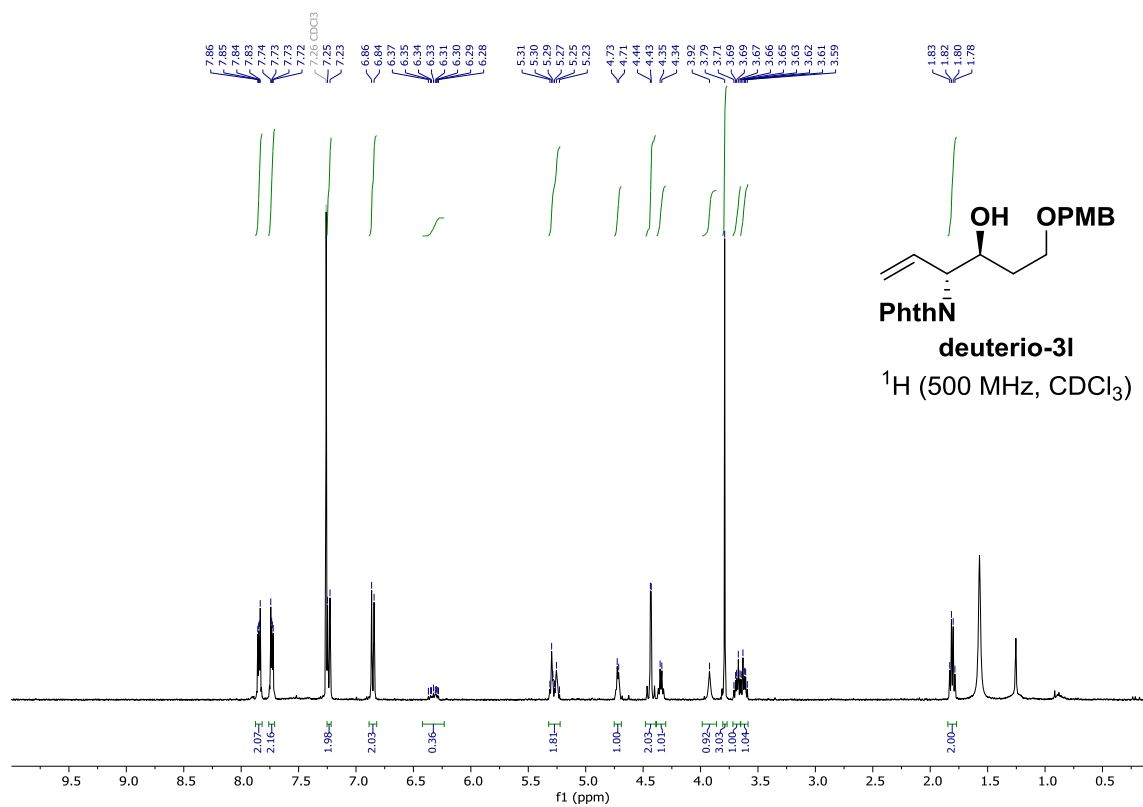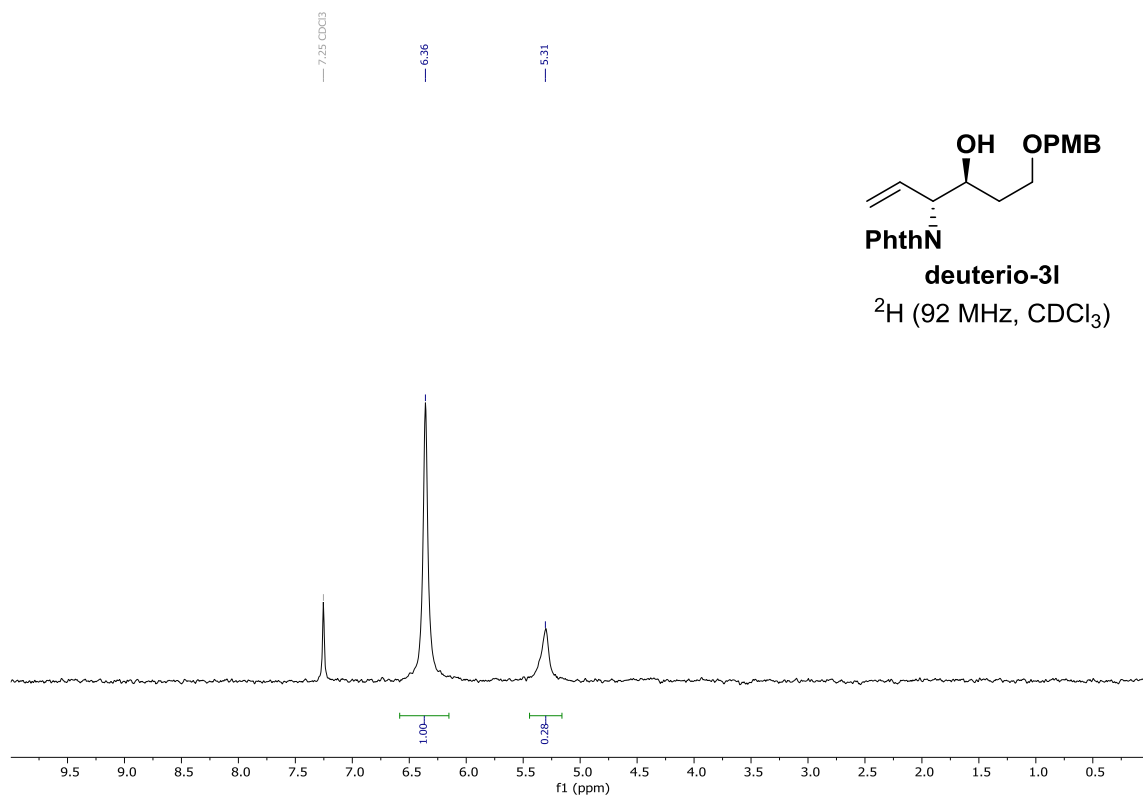

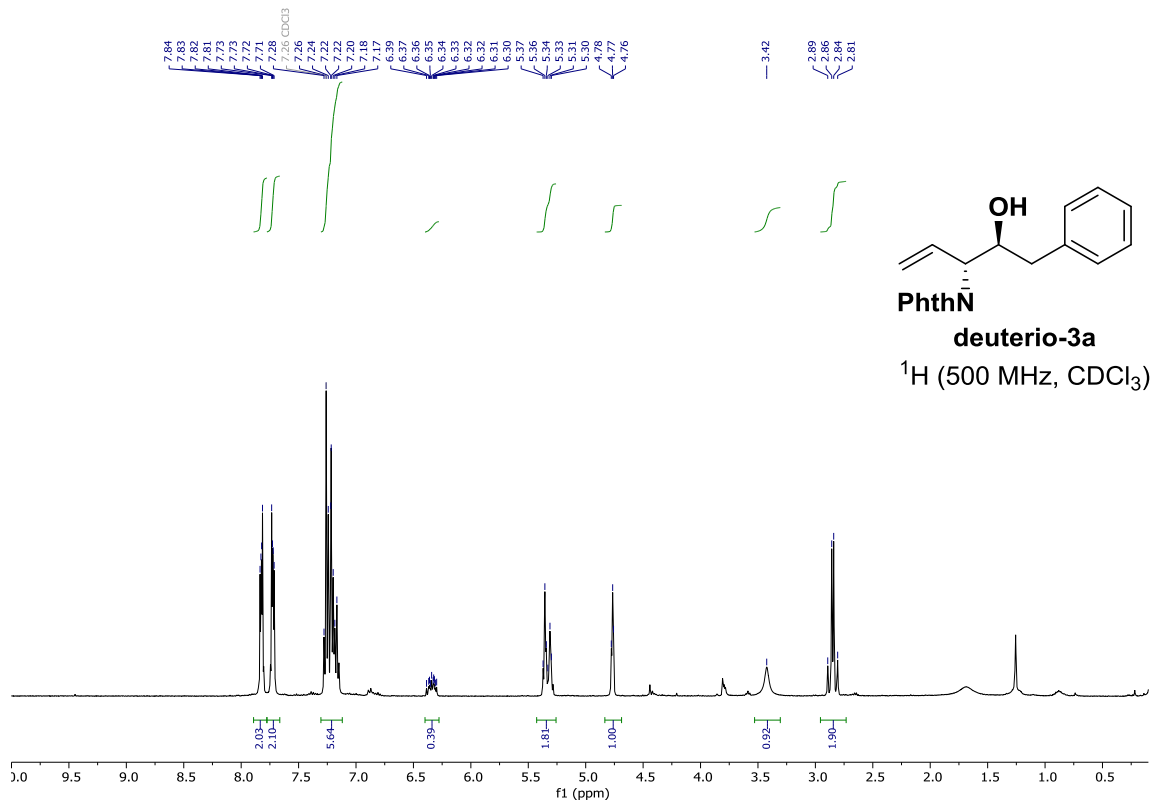



## Single Crystal Diffraction Data for Coupling Product 3a

|                                   |                                                                                                                                                                       |
|-----------------------------------|-----------------------------------------------------------------------------------------------------------------------------------------------------------------------|
| Empirical formula                 | C <sub>19</sub> H <sub>17</sub> N O <sub>3</sub>                                                                                                                      |
| Formula weight                    | 307.33                                                                                                                                                                |
| Temperature                       | 100(2) K                                                                                                                                                              |
| Wavelength                        | 1.54184 Å                                                                                                                                                             |
| Crystal system                    | triclinic                                                                                                                                                             |
| Space group                       | P 1                                                                                                                                                                   |
| Unit cell dimensions              | a = 7.6636(2) Å                      α = 86.249(2)°.<br>b = 9.5929(2) Å                      β = 76.166(2)°.<br>c = 10.8499(2) Å                      γ = 79.110(2)°. |
| Volume                            | 760.39(3) Å <sup>3</sup>                                                                                                                                              |
| Z                                 | 2                                                                                                                                                                     |
| Density (calculated)              | 1.342 Mg/m <sup>3</sup>                                                                                                                                               |
| Absorption coefficient            | 0.738 mm <sup>-1</sup>                                                                                                                                                |
| F(000)                            | 324                                                                                                                                                                   |
| Crystal size                      | 0.34 x 0.12 x 0.065 mm <sup>3</sup>                                                                                                                                   |
| Theta range for data collection   | 4.197 to 75.699°.                                                                                                                                                     |
| Index ranges                      | -9<=h<=9, -11<=k<=12, -13<=l<=13                                                                                                                                      |
| Reflections collected             | 26510                                                                                                                                                                 |
| Independent reflections           | 5735 [R(int) = 0.0395]                                                                                                                                                |
| Completeness to theta = 67.684°   | 99.7 %                                                                                                                                                                |
| Absorption correction             | Gaussian and multi-scan                                                                                                                                               |
| Max. and min. transmission        | 1.00 and 0.534                                                                                                                                                        |
| Refinement method                 | Full-matrix least-squares on F <sup>2</sup>                                                                                                                           |
| Data / restraints / parameters    | 5735 / 3 / 433                                                                                                                                                        |
| Goodness-of-fit on F <sup>2</sup> | 1.048                                                                                                                                                                 |
| Final R indices [I>2sigma(I)]     | R1 = 0.0357, wR2 = 0.0952                                                                                                                                             |
| R indices (all data)              | R1 = 0.0367, wR2 = 0.0961                                                                                                                                             |
| Absolute structure parameter      | 0.04(10)                                                                                                                                                              |
| Extinction coefficient            | n/a                                                                                                                                                                   |
| Largest diff. peak and hole       | 0.175 and -0.218 e.Å <sup>-3</sup>                                                                                                                                    |

**Figure 1.** View of H-bound dimer formed in **3a** showing the heteroatom labeling scheme. Displacement ellipsoids are scaled to the 50% probability level. Dashed lines are indicative of an H-bonding interaction.

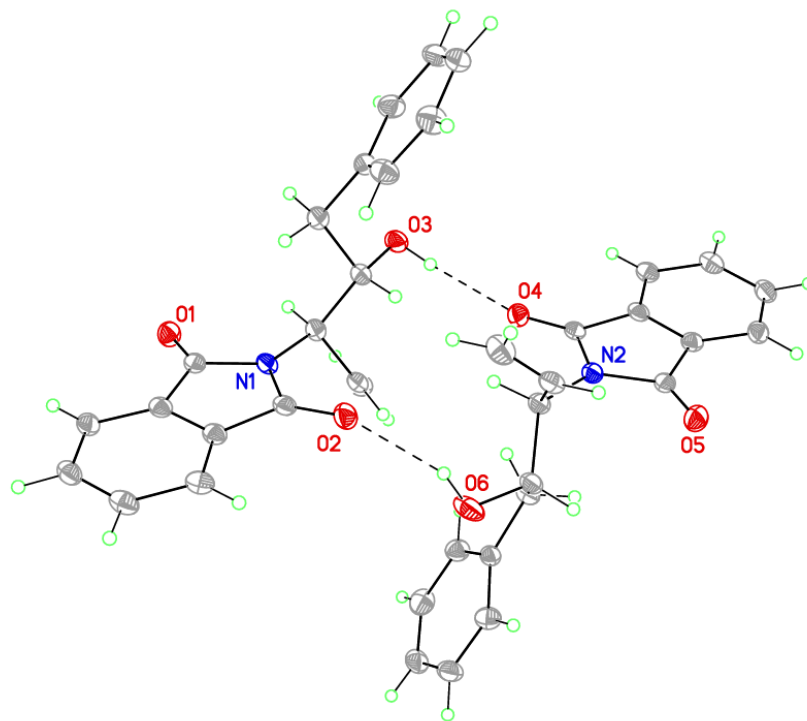

## Single Crystal Diffraction Data for Coupling Product 3v

|                                   |                                                                                                                                                          |
|-----------------------------------|----------------------------------------------------------------------------------------------------------------------------------------------------------|
| Empirical formula                 | C <sub>16</sub> H <sub>17</sub> N O <sub>3</sub>                                                                                                         |
| Formula weight                    | 271.30                                                                                                                                                   |
| Temperature                       | 100(2) K                                                                                                                                                 |
| Wavelength                        | 1.54184 Å                                                                                                                                                |
| Crystal system                    | monoclinic                                                                                                                                               |
| Space group                       | P 2 <sub>1</sub>                                                                                                                                         |
| Unit cell dimensions              | a = 8.3815(2) Å                      α = 90°.<br>b = 22.4250(2) Å                      β = 117.675(2)°.<br>c = 8.6781(2) Å                      γ = 90°. |
| Volume                            | 1444.49(5) Å <sup>3</sup>                                                                                                                                |
| Z                                 | 4                                                                                                                                                        |
| Density (calculated)              | 1.248 Mg/m <sup>3</sup>                                                                                                                                  |
| Absorption coefficient            | 0.702 mm <sup>-1</sup>                                                                                                                                   |
| F(000)                            | 576                                                                                                                                                      |
| Crystal size                      | 0.31 x 0.18 x 0.11 mm <sup>3</sup>                                                                                                                       |
| Theta range for data collection   | 3.943 to 76.170°.                                                                                                                                        |
| Index ranges                      | -10 ≤ h ≤ 10, -28 ≤ k ≤ 28, -10 ≤ l ≤ 10                                                                                                                 |
| Reflections collected             | 33708                                                                                                                                                    |
| Independent reflections           | 5984 [R(int) = 0.0393]                                                                                                                                   |
| Completeness to theta = 67.684°   | 100.0 %                                                                                                                                                  |
| Absorption correction             | Gaussian and multi-scan                                                                                                                                  |
| Max. and min. transmission        | 1.00 and 0.713                                                                                                                                           |
| Refinement method                 | Full-matrix least-squares on F <sup>2</sup>                                                                                                              |
| Data / restraints / parameters    | 5984 / 1 / 389                                                                                                                                           |
| Goodness-of-fit on F <sup>2</sup> | 1.020                                                                                                                                                    |
| Final R indices [I > 2σ(I)]       | R <sub>1</sub> = 0.0372, wR <sub>2</sub> = 0.1006                                                                                                        |
| R indices (all data)              | R <sub>1</sub> = 0.0378, wR <sub>2</sub> = 0.1026                                                                                                        |
| Absolute structure parameter      | -0.09(6)                                                                                                                                                 |
| Extinction coefficient            | n/a                                                                                                                                                      |
| Largest diff. peak and hole       | 0.385 and -0.211 e.Å <sup>-3</sup>                                                                                                                       |

**Figure 2.** View of **3v** showing the atom labeling scheme. Displacement ellipsoids are scaled to the 50% probability level.

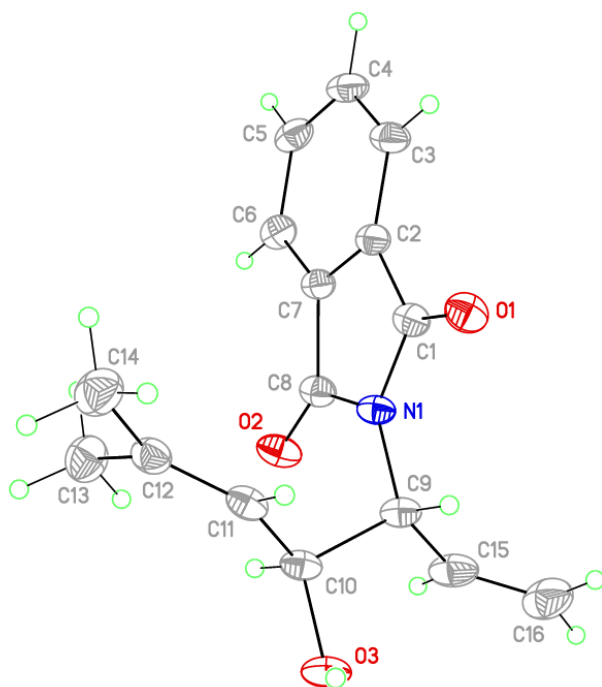

## Single Crystal Diffraction Data for Ir-VI

|                                   |                                                                                 |          |
|-----------------------------------|---------------------------------------------------------------------------------|----------|
| Empirical formula                 | C <sub>58</sub> H <sub>55</sub> Ir N <sub>2</sub> O <sub>7</sub> P <sub>2</sub> |          |
| Formula weight                    | 1146.18                                                                         |          |
| Temperature                       | 100(2) K                                                                        |          |
| Wavelength                        | 0.71073 Å                                                                       |          |
| Crystal system                    | orthorhombic                                                                    |          |
| Space group                       | P 21 21 21                                                                      |          |
| Unit cell dimensions              | a = 14.339(2) Å                                                                 | α = 90°. |
|                                   | b = 17.764(2) Å                                                                 | β = 90°. |
|                                   | c = 18.920(3) Å                                                                 | γ = 90°. |
| Volume                            | 4819.4(11) Å <sup>3</sup>                                                       |          |
| Z                                 | 4                                                                               |          |
| Density (calculated)              | 1.580 Mg/m <sup>3</sup>                                                         |          |
| Absorption coefficient            | 2.896 mm <sup>-1</sup>                                                          |          |
| F(000)                            | 2320                                                                            |          |
| Crystal size                      | 0.220 x 0.110 x 0.100 mm <sup>3</sup>                                           |          |
| Theta range for data collection   | 2.293 to 28.413°.                                                               |          |
| Index ranges                      | -19<=h<=19, -23<=k<=23, -25<=l<=25                                              |          |
| Reflections collected             | 67534                                                                           |          |
| Independent reflections           | 12021 [R(int) = 0.0906]                                                         |          |
| Completeness to theta = 25.242°   | 99.9 %                                                                          |          |
| Absorption correction             | Numerical                                                                       |          |
| Max. and min. transmission        | 1.00 and 0.759                                                                  |          |
| Refinement method                 | Full-matrix least-squares on F <sup>2</sup>                                     |          |
| Data / restraints / parameters    | 12021 / 420 / 631                                                               |          |
| Goodness-of-fit on F <sup>2</sup> | 1.024                                                                           |          |
| Final R indices [I>2sigma(I)]     | R1 = 0.0377, wR2 = 0.0773                                                       |          |
| R indices (all data)              | R1 = 0.0489, wR2 = 0.0806                                                       |          |
| Absolute structure parameter      | -0.007(4)                                                                       |          |
| Extinction coefficient            | n/a                                                                             |          |
| Largest diff. peak and hole       | 1.197 and -0.918 e.Å <sup>-3</sup>                                              |          |

**Figure 3.** View of the Ir complex showing the heteroatom labeling scheme. Displacement ellipsoids are scaled to the 50% probability level. Most hydrogen atoms have been omitted for clarity.

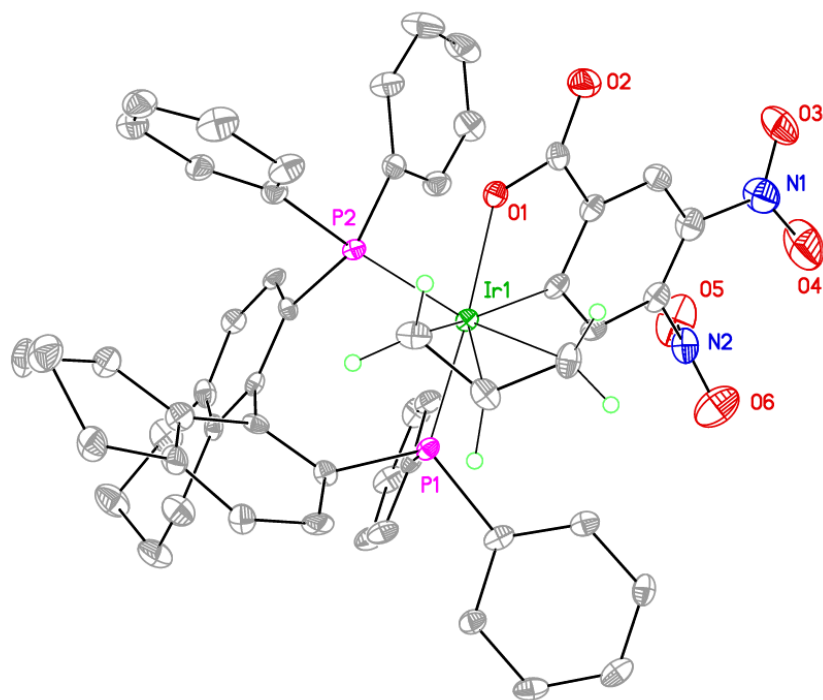

## Kinetic Studies

*Standard Conditions:* To a dried 5 mL volumetric flask under an argon atmosphere charged with with (R)-Ir-VI (53.7mg, 0.05 mmol, 5 mol%), phthalimido-allene (277.8 mg, 1.5 mmol, 150 mol%), KH<sub>2</sub>PO<sub>4</sub> (136.1 mg, 1 mmol, 100 mol%), and 1,3,5-trimethoxybenzene (internal standard, 168.2 mg, 1 mmol, 100 mol%) was added 2-phenylethanol (120  $\mu$ L, 1 mmol, 100 mol%). The flask was then filled to the mark with dioxane and sonicated until full dissolution. The reaction mixture was then transfer *via* syringe to a condenser-tube sealed with a rubber septa under an argon atmosphere. The reaction mixture was then heated to 100 °C.

Reaction progress was monitored by sampling followed by NMR analysis. The reaction was sampled by removable of approximately 100  $\mu$ L of the reaction mixture *via* syringe and dilution with CDCl<sub>3</sub>.

**Table S1.** Further reaction conditions for the kinetic experiments.

| Experiment                      | [Ir] (M) | [1] (M) | [2a] (M) | [excess]<br>[1]-[2a] (M) | Note                    |
|---------------------------------|----------|---------|----------|--------------------------|-------------------------|
| Standard                        | 0.01     | 0.3     | 0.2      | 0.1                      | -                       |
| Different excess 1              | 0.01     | 0.6     | 0.2      | 0.4                      | -                       |
| Different excess 2              | 0.01     | 0.3     | 0.4      | -0.1                     | -                       |
| Same excess                     | 0.01     | 0.2     | 0.1      | 0.1                      | -                       |
| Same excess<br>product addition | 0.01     | 0.2     | 0.1      | 0.1                      | <b>3a</b> 0.08M         |
| Increased catalyst              | 0.02     | 0.3     | 0.2      | 0.1                      | -                       |
| Added Aldehyde                  | 0.01     | 0.3     | 0.2      | 0.1                      | <i>dehydro-2a</i> 0.01M |

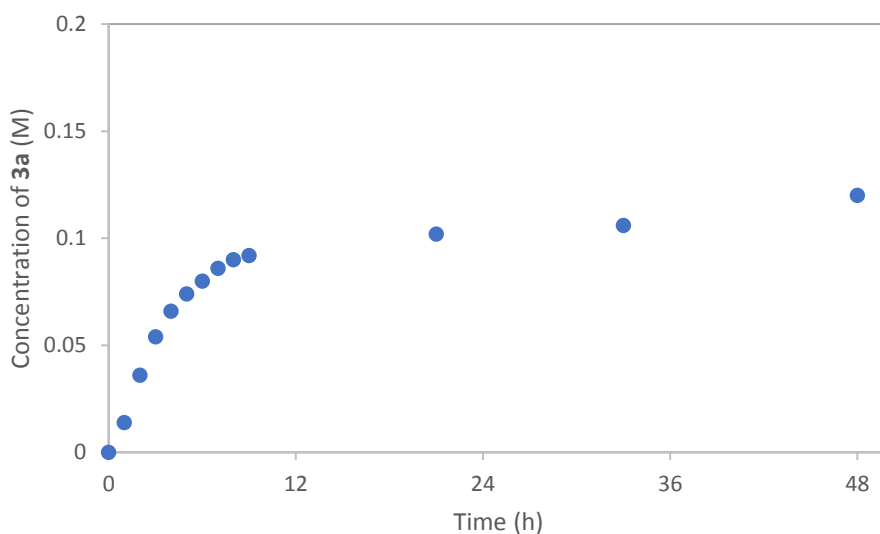

**Figure 4.** Product formation under standard conditions.

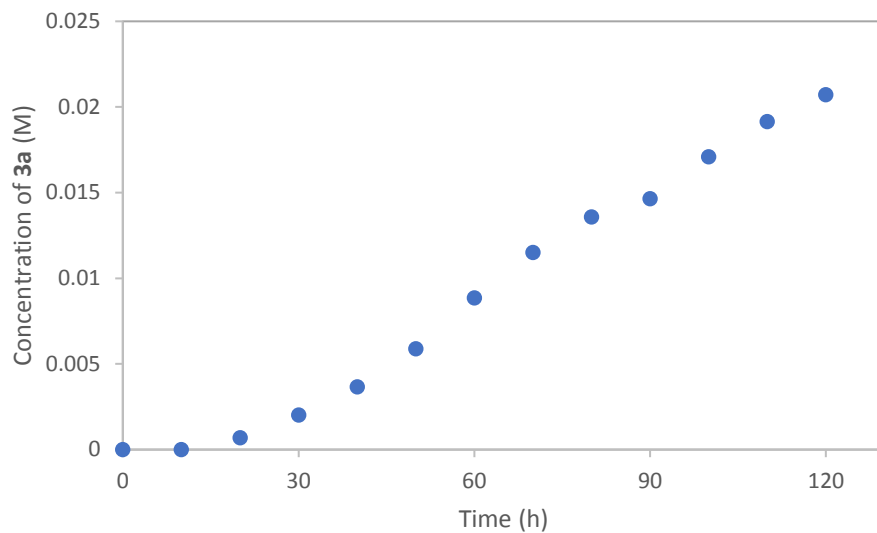

**Figure 5.** Product formation under standard conditions. Reaction monitored for first 2 hours to determine initial rate.

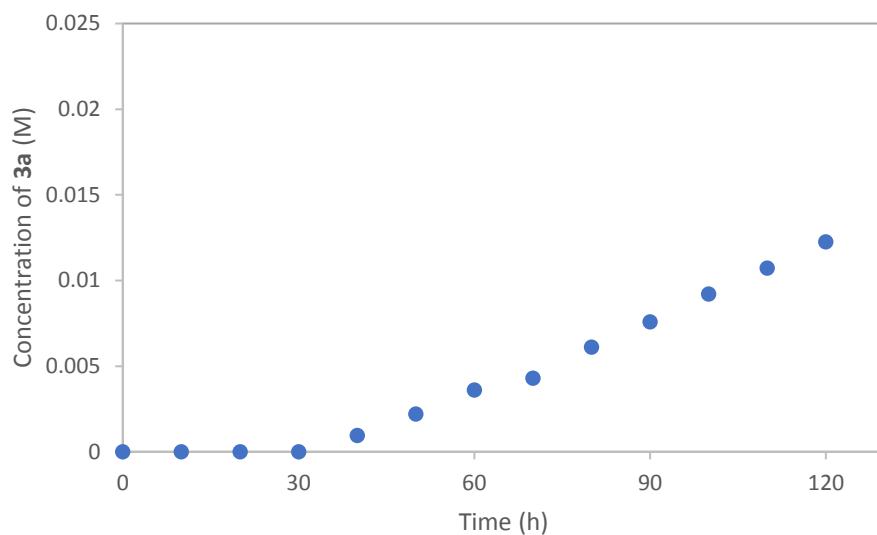

**Figure 6.** Product formation under standard conditions utilizing **deuterio-2a**. Reaction monitored for first 2 hours to determine initial rate.



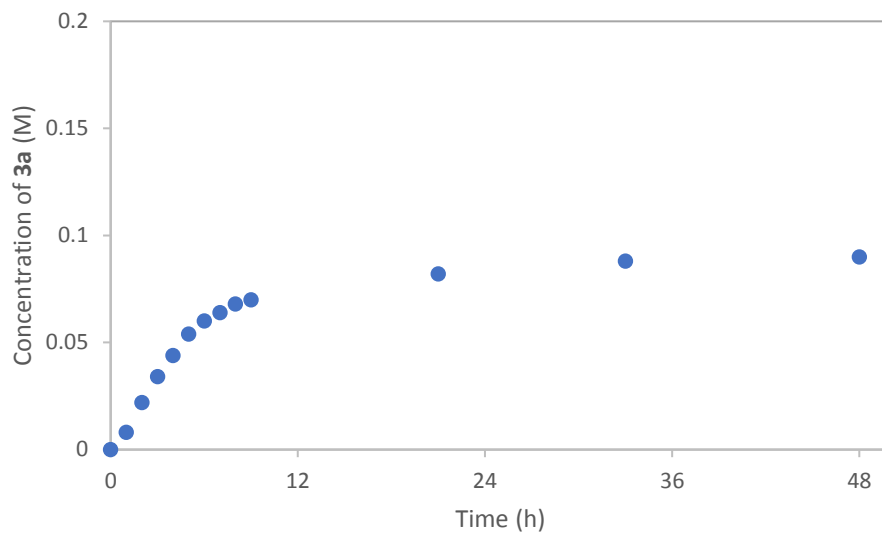

**Figure 7.** Product formation under different excess 1 conditions.

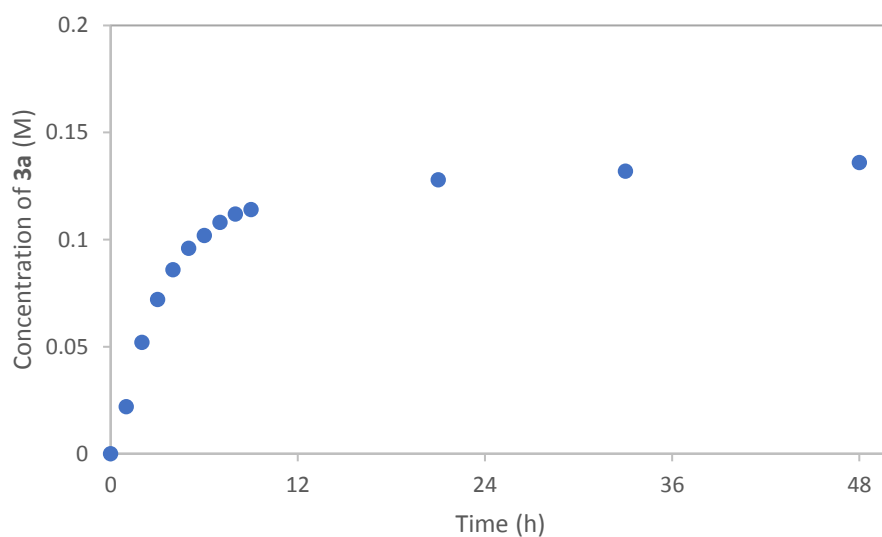

**Figure 8.** Product formation under different excess 2 conditions.

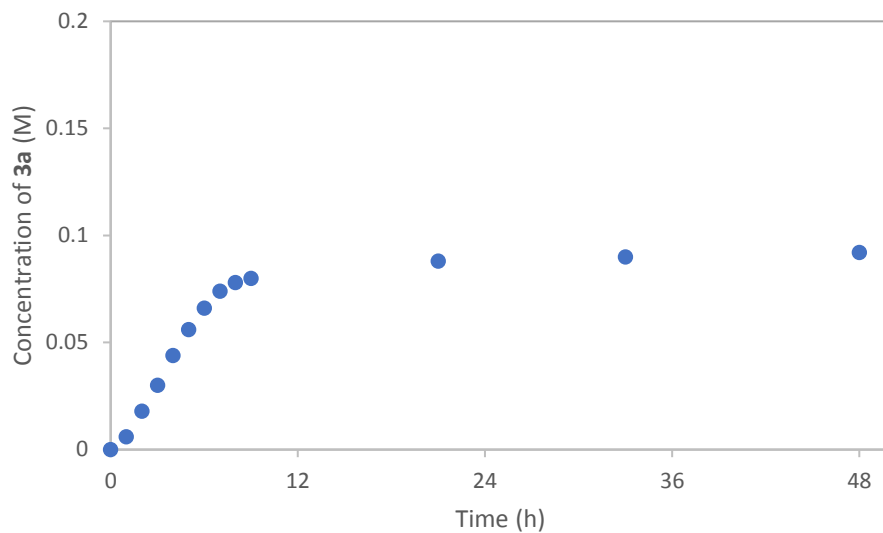

**Figure 9.** Product formation under same excess conditions.

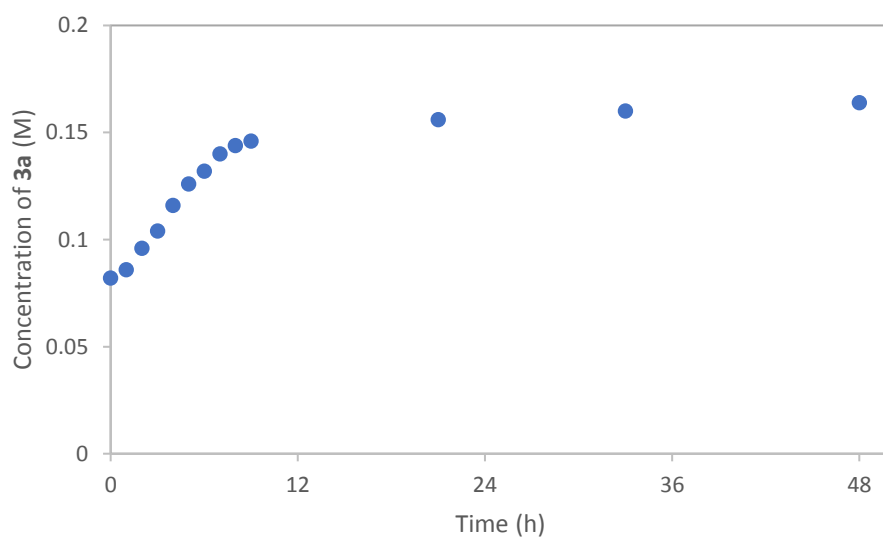

**Figure 10.** Product formation under same excess conditions with product addition.

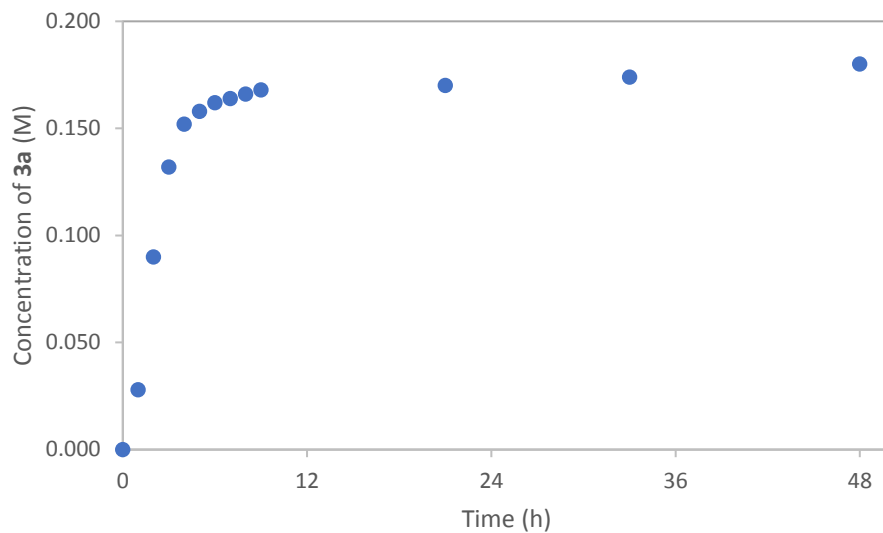

**Figure 11.** Product formation under increased catalyst conditions.

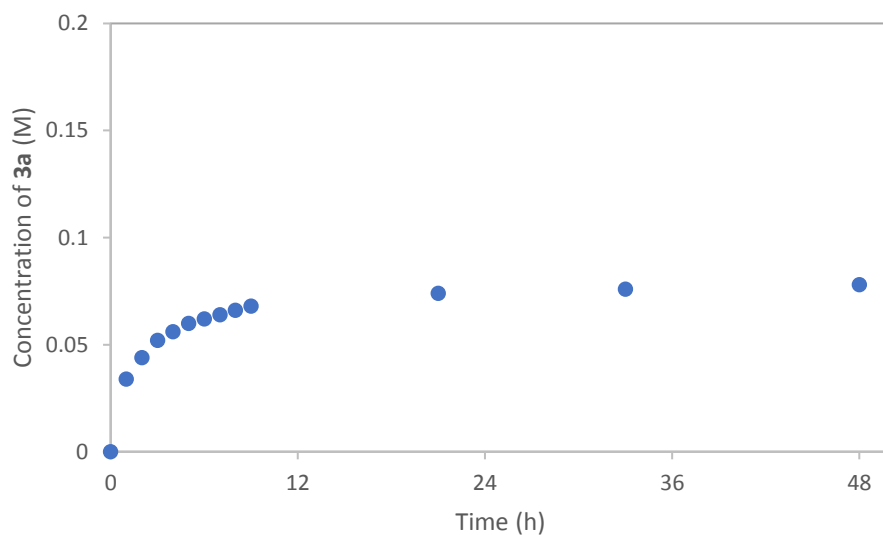

**Figure 12.** Product formation under standard conditions with 10 mol% aldehyde *dehydro-2a* added.

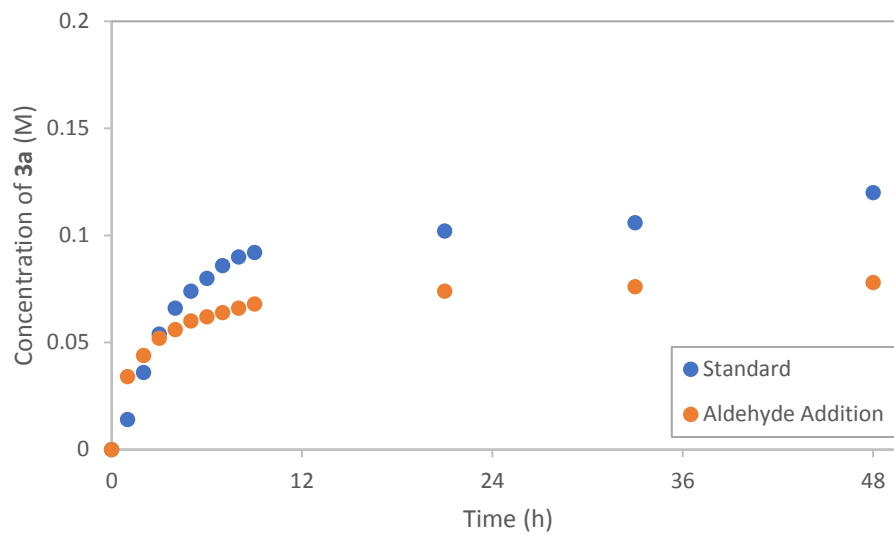

**Figure 13.** Product formation under standard conditions with 10 mol% aldehyde *dehydro-2a* added comparison to standard conditions – negative order.

In order to determine if any catalyst deactivation occurred during the reaction the same excess protocol was utilized. The collected product concentration data for both the standard and same excess data sets were converted to alcohol concentration data ( $[2a]_t = [2a]_0 - [3a]_t$ ). Since the starting concentration of the same excess experiments is different than that of the standard experiment, the same excess time data was adjusted accordingly. This method is representative of starting the reaction from two different starting points. At the point where the standard data set reaches the starting point of the same excess data set they then represent a reaction with the same conditions, with the exception of the first containing product already present and a catalyst that has completed more turnovers.<sup>5</sup> The failure of these two curves to overlap indicates that significant catalyst deactivation occurs. Additionally, in the case of the same excess conditions with product addition, a slight shift towards the standard conditions indicates that the product is contributing to the deactivation pathway. This is only a moderate contribution.

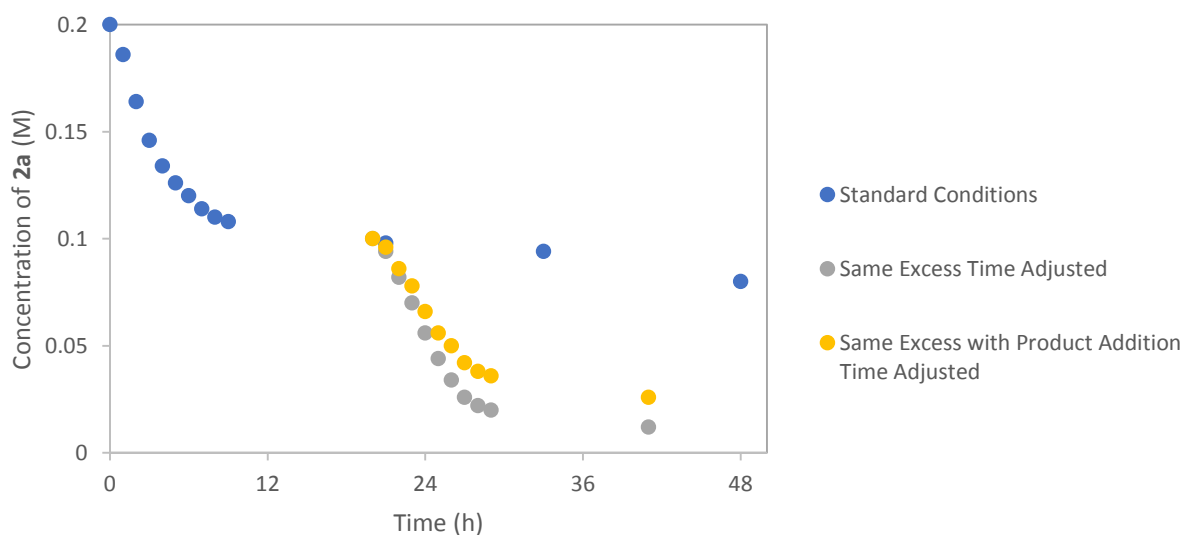

**Figure 14.** Evaluation of catalyst performance utilizing same excess protocol.

## References

- (1) Still, W. C.; Kahn, M.; Mitra, A. *J. Org. Chem.* **1978**, *43*, 2923.
- (2) Alonso, F.; Moglie, Y.; Radivoy, G.; Yus, M. *Org. Biomol. Chem.* **2011**, *9*, 6385.
- (3) Lindsay, V. N. G.; Fiset, D.; Gritsch, P. J.; Azzi, S.; Charette, A. B. *J. Am. Chem. Soc.* **2013**, *135*, 1463.
- (4) Werstiuk, N. H.; Timmins, G. *Can. J. Chem.* **1986**, *64*, 1072
- (5) For a review on reaction progress kinetic analysis, see: Blackmond, D. G. *Angew. Chem. Int. Ed.* **2005**, *44*, 4302.
